# Supplementary material for: Gas–particle partitioning of toluene oxidation products: an experimental and modeling study
Source: Copernicus journal article supplement (doi:10.5194/acp-23-15537-2023), 2023-12-20
Supplement: Supplementary file 1 [file acp-23-15537-2023-supplement.pdf]

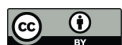

*Supplement of*

## **Gas–particle partitioning of toluene oxidation products: an experimental and modeling study**

**Victor Lannuque et al.**

*Correspondence to:* Victor Lannuque ([victor.lannuque@enpc.fr](mailto:victor.lannuque@enpc.fr)) and Barbara D’Anna ([barbara.danna@univ-amu.fr](mailto:barbara.danna@univ-amu.fr))

The copyright of individual parts of the supplement might differ from the article licence.

**Part 1: Instrumentation and experiments**

**Part 2: Modeling and chemical mechanisms**

**Part 3: Experimental and modeling speciation data**

## Part 1: Instrumentation and experiments

The PTR-ToF-MS drift tube was operated in the  $\text{H}_3\text{O}^+$  mode with the same parameters for the gas phase and particle phase (CHARON) measurements: 2.35 mbar absolute pressure, 120°C temperature, and a reduced electric field strength of 105 Td ( $1 \text{ Td} = 10^{-17} \text{ V cm}^2$ ). With the chosen instrumental parameters, ion hydration in the drift tube was still efficiently suppressed. Typical mass resolving power (FWHM) and mass accuracy values were 4000 and 13 ppm, respectively. A multicomponent calibration gas standard (Apel Riemer Environmental Inc., Miami, FL, USA) was used for characterizing the instrumental response to low molecular weight analytes ( $m/z < 200$ ). Typically, 99.5% of the signals in were below  $m/z$  200. The instrumental background was determined by periodically diverting the sampling flow through a High-Efficiency Particulate Air filter (HC01-5N-B miniature HEPA capsule filter) placed upstream of the CHARON inlet. The CHARON enrichment factor was 25 for particles above 250 nm, 20 for particles of 200 nm and 8 for particles around 150 nm (Fig S1). Enrichment factors were determined using size selected ammonium nitrate particles as described by Eichler et al (2015).

PTR-MS ionization of organic analytes (with the exception of a few small hydrocarbons) occurs at the collisional rate, which can be accurately predicted by ion–molecule collision theories. (Ellis et al. 2013) We used the Langevin–Gioumousis–Stevenson theory (Langevin, 1903; Gioumousis and Stevenson 1958) instrumental response factors to pure hydrocarbons. The Su and Chesnavich parametrized capture rate theory (Su and Chesnavich, 1982) was used for calculating instrumental sensitivities of heteroatom-containing hydrocarbons. This means that instrumental response factor can be calculated from the molecular weight, isotropic molecular polarizability, and dipole moment of an analyte molecule. We used the observed  $m/z$  ( $-1$  to account for the added proton) as a proxy for the molecular weight, assuming that analyte molecules do not fragment upon protonation. Isotropic molecular polarizabilities were determined from the analyte ions' elemental composition using the parametrization proposed by Bosque and Sales. (Bosque and Sales, 2002). Dipole moments cannot be predicted solely from the molecular sum formula, and a constant value of 2.75 D was used for all heteroatom-containing analyte ions. This value represents an average of typical dipole moments of oxygenated hydrocarbons (1–4.5 D). This introduces a maximum quantification uncertainty of  $\pm 40\%$ . The major primary reaction product, methylglyoxal, has a very low dipole moment ( $\mu\text{D} = 0.992 \text{ D}$ ) and does not react with protonated water clusters  $(\text{H}_2\text{O})_n\text{H}^+$  ( $n > 1$ ). Ion chemistry kinetics is thus similar to benzene and benzene sensitivities were used for methylglyoxal quantification. Expected uncertainties are  $\pm 20 \%$  for methylglyoxal. Signals with unknown elemental composition were quantified using the acetone sensitivity as a proxy, the maximum uncertainty in the response factor being  $-30/+60\%$ . The total mass concentration of SOA was calculated by summing the mass concentrations associated with all detected  $m/z$  peaks.

The HR-ToF-AMS data were analyzed using the standard software SQUIRREL v1.60E and PIKA v1.6C (Sueper, 2011) with Igor Pro 6.37 (Wavemetrics Inc.). A high efficiency particulate air (HEPA) filter installed in front of the instrument to sample ambient air for 15-30 minutes was used to evaluate the instruments detection limits calculated as three times the standard deviation of the measured chemical species. The ionization efficiency (IE) with respect to nitrate anions was calculated at the beginning and at the end of the campaign using nebulised 350 nm mobility diameter ammonium nitrate particles (BFSP software was used and values varied between  $2.2 \times 10^{-7}$  –  $2.5 \times 10^{-7}$ ). The relative IE (RIE) of ammonium was 3.7 based on the mass spectrum of ammonium nitrate data from IE calibrations. The RIE of sulfate was determined by comparing the theoretical and the measured concentration of a solution of ammonium nitrate and ammonium sulfate and was determined to be 1.3. For the organic fraction the default value of 1.4 was used. The AMS data were corrected by collection efficiency (CE) calculated by comparison to the SMPS volume using densities of  $1.7 \text{ g/cm}^3$  for ammonium sulphate and  $1.4 \text{ g/cm}^3$  for organics. The CE values varied from 0.35 for pure ammonium sulphate particles to 0.70 after SOA formation (above  $8 \mu\text{g/m}^3$ ). Size calibrations were conducted once using polystyrene latex spheres (PSL). The instrument resolution varied from 1200-1400.

#### **CHARON PTR-ToF-MS compound selection and interpretation**

Saturation mass concentration  $\log(C_i^*)$  values are here used to discriminate between parent and fragment ions (fig. S4). The procedure (Gkatzelis et al., 2018b) suggests that if the volatility of a specific ion  $(M+H)^+$  is similar to that of the ion  $(M+H-FG)^+$ , where FG is a functional group, then this latter is considered a possible ion fragment. If the volatility of the ion  $(M+H)^+$  is considerably lower than the one of  $(M+H-FG)^+$  then this latter is considered a possible parent ion. Figure S4 in the supplementary document shows some of the  $(M+H-H_2O)^+$  ions considered fragments (blue) close to the 1:1 line. While in red are shown  $(M+H-H_2O)^+$  ions having higher volatility therefore considered as possible parent ions. The gray lines indicate the  $\pm 0.3$  change in  $\log(C_i^*)$ . Error bars correspond to the error of the average ( $1\sigma$ ).

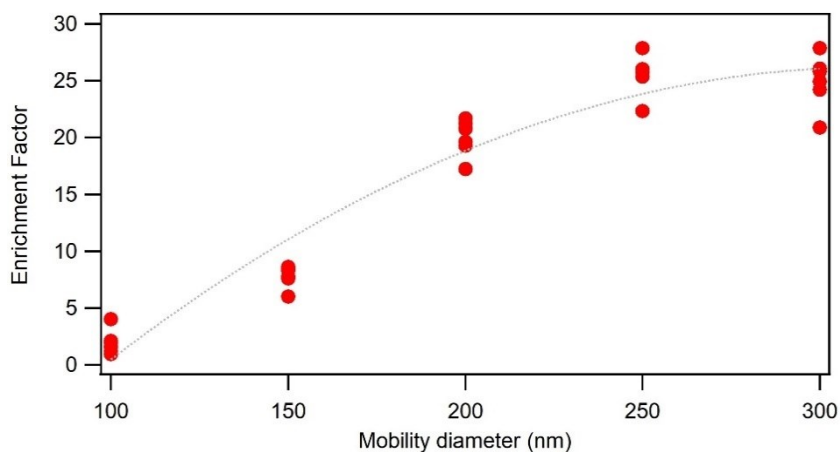

**Figure S1: Enrichment factor calibration carried out with monodisperse particles of ammonium nitrate.**

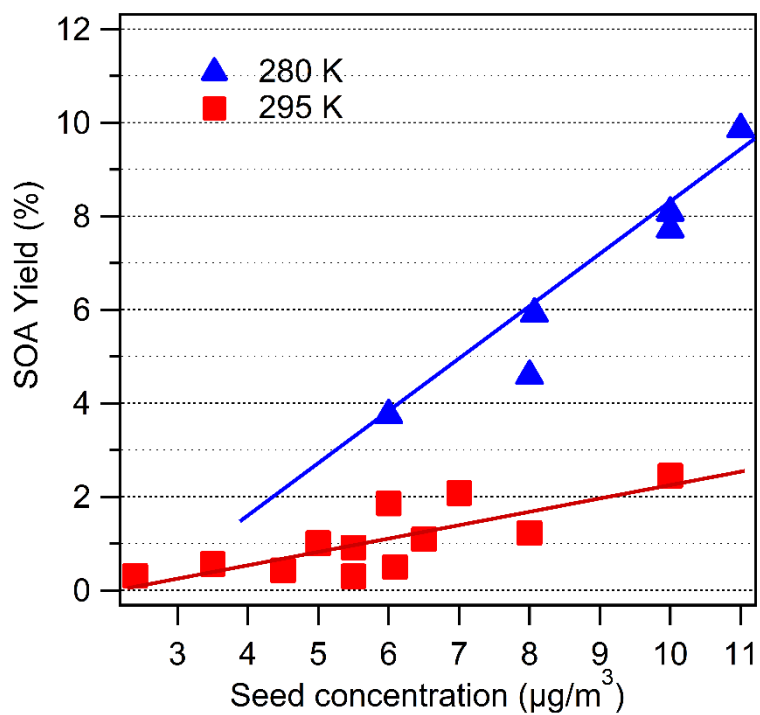

**Figure S2: SOA yield derived as a function of seed concentration at 280K and 295K, respectively.**

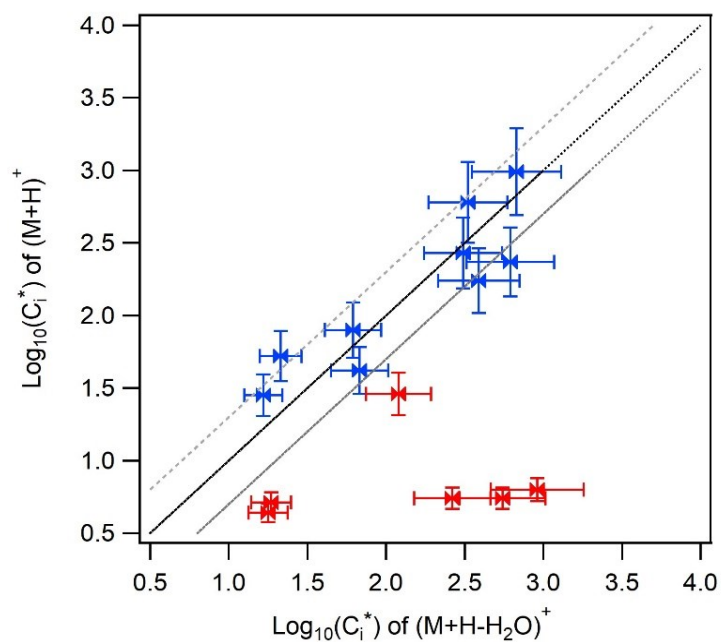

**Figure S3: Fragment identification method from the toluene photo-oxidation experiments: correlation of the saturation concentration of identified  $(M+H)^+$  ions to compounds with the same chemical formula subtracting water  $(M+H-H_2O)^+$ . For correlation close to the 1:1 line then the  $(M+H-H_2O)^+$  compound is considered a fragment (blue). If the  $(M+H-H_2O)^+$  ion shows a higher volatility, it is considered as a possible parent ion (red). The gray lines indicate the  $\pm 0.3$  change in  $\log(C_i^*)$ . Error bars correspond to the error of the average ( $1\sigma$ ).**

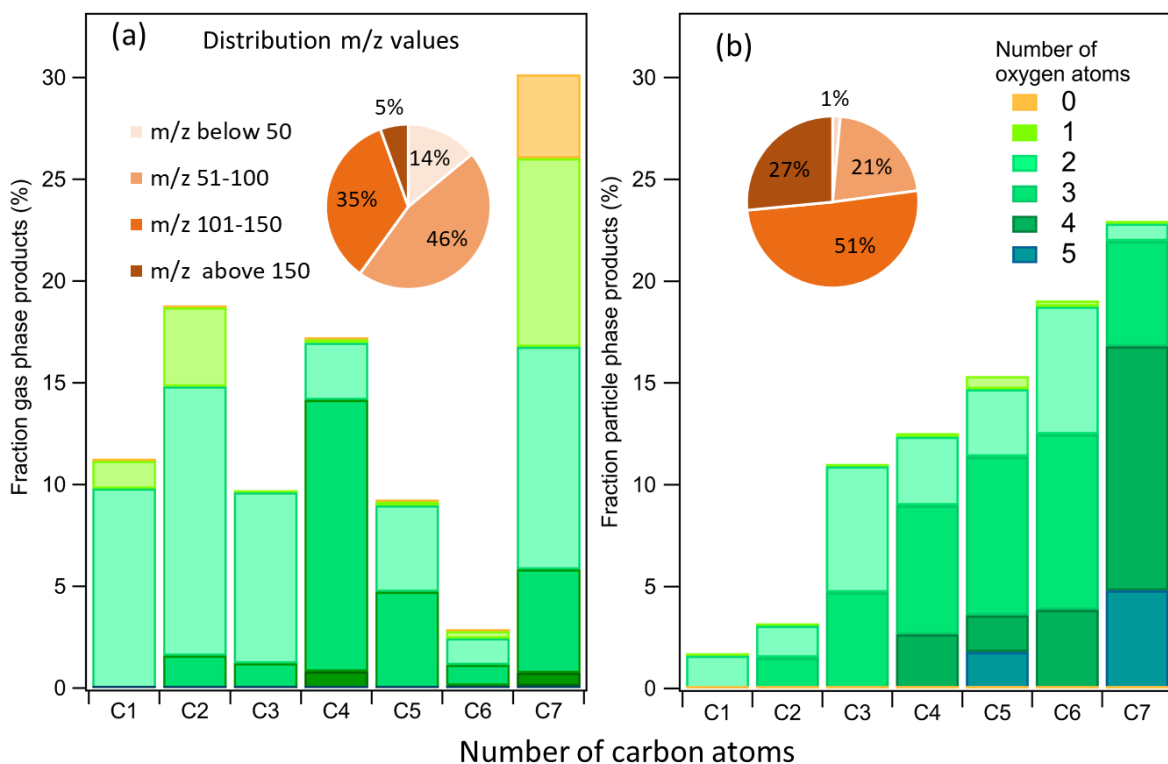

**Figure S4: Mass products fraction (y-axis) distribution based on the number of carbon atoms (x-axis) for an experiment with 112 ppbv toluene at 295 K. Detected ions in the (a) gas phase and (b) particle phase. Pie charts correspond to the molecular weight contribution to the overall mass.**

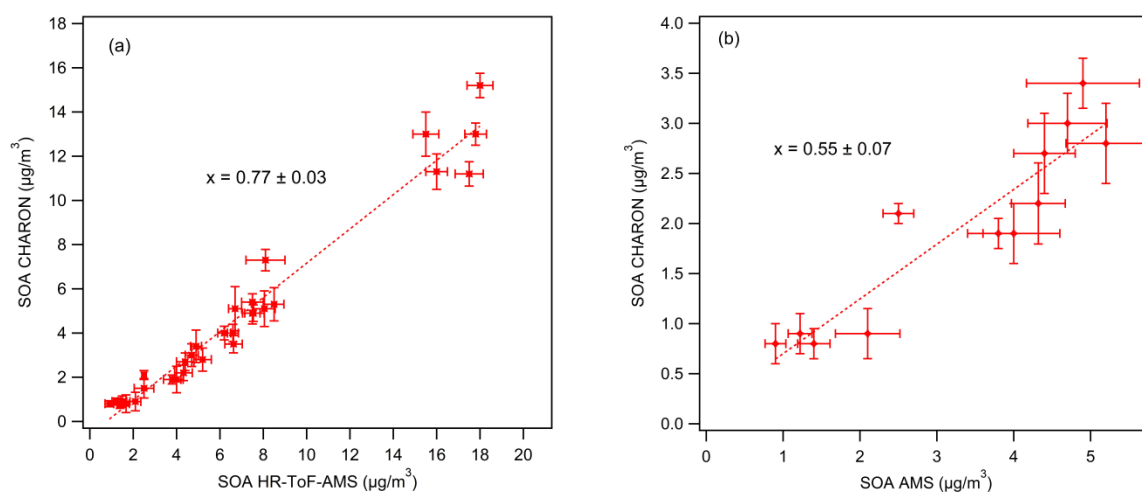

**Figure S5: Comparison of the organic particle mass concentrations measured with CHARON/PTR-ToF-MS and HR-ToF-AMS for all experiments (a), and for experiments where particle mobility diameter was below 150 nm (b). Markers correspond to the different experiments. HR-ToF-AMS data are here corrected by collection efficiency determined by comparison with SMPS volume data.**

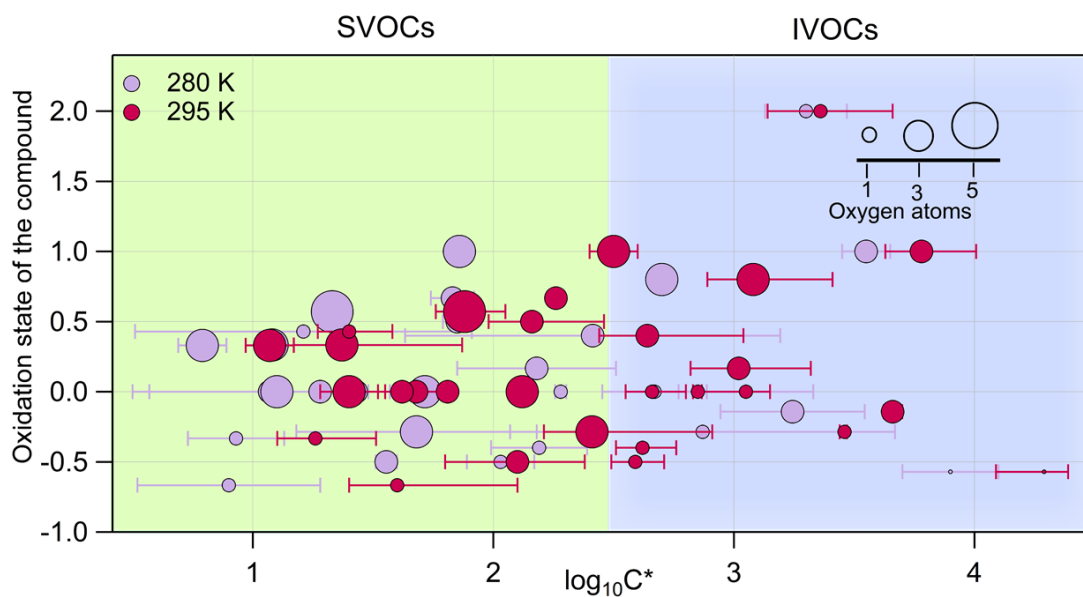

**Figure S6:** The oxidation state for the detected ions (OSc), versus the averaged saturation concentration in terms of  $\log_{10}C_i^*$ . The area of the dots denotes the oxygen atoms number. In light violet are represented the ions fragments identified for an experiment carried out at 280 K and in magenta those at 295 K. Errors bars correspond to  $\pm 1\sigma$  of the experimental average.



**Table S1: List of the experimental conditions, SOA concentrations and yields calculated for HR-ToF-AMS and CHARON/PTR-ToF-MS measurements.**

| No. | Temp. (K) | RH (%) | Initial Toluene (ppbv) | OH conc. ( $10^7 \text{ cm}^{-3}$ ) | Seed mass ( $\mu\text{g}/\text{m}^3$ ) | Seed Dp* (nm) | SOA <sup>1</sup> ( $\mu\text{g}/\text{m}^3$ ) | SOA Yield <sup>1</sup> (%) | SOA <sup>2</sup> ( $\mu\text{g}/\text{m}^3$ ) | SOA Yield <sup>2</sup> (%) |
|-----|-----------|--------|------------------------|-------------------------------------|----------------------------------------|---------------|-----------------------------------------------|----------------------------|-----------------------------------------------|----------------------------|
| 1   | 295       | 41     | 162                    | 9.2                                 | 2.5                                    | 113           | 3.3                                           | 0.93                       | 1.9                                           | 0.54                       |
| 2   | 295       | 41     | 162                    | 10.0                                | 4.8                                    | 117           | 4.6                                           | 1.28                       | 2.7                                           | 0.75                       |
| 3   | 295       | 38     | 131                    | 9.1                                 | 4.5                                    | 113           | 1.5                                           | 0.68                       | 0.6                                           | 0.36                       |
| 4   | 295       | 43     | 128                    | 10.0                                | 3.8                                    | 115           | 3.0                                           | 1.10                       | 2.1                                           | 0.75                       |
| 5   | 295       | 30     | 112                    | 12.0                                | 7.0                                    | 135           | 8.0                                           | 3.38                       | 5.3                                           | 2.50                       |
| 6   | 295       | 30     | 112                    | 9.0                                 | 9.0                                    | 163           | 6.7                                           | 3.57                       | 4.2                                           | 2.23                       |
| 7   | 295       | 24     | 112                    | 9.0                                 | 9.0                                    | 169           | 8.2                                           | 4.30                       | 4.9                                           | 2.56                       |
| 8   | 295       | 35     | 84                     | 12.0                                | 6.0                                    | 120           | 3.2                                           | 1.64                       | 2.4                                           | 1.52                       |
| 9   | 295       | 30     | 66                     | 10.8                                | 20.0                                   | 141           | 6.6                                           | 5.10                       | 4.0                                           | 3.09                       |
| 10  | 295       | 30     | 23                     | 8.4                                 | 7.1                                    | 163           | 1.7                                           | 4.34                       | 0.8                                           | 2.03                       |
| 11  | 289       | 37     | 128                    | 12.0                                | 5.0                                    | 115           | 4.6                                           | 1.60                       | 1.9                                           | 0.66                       |
| 12  | 285       | 36     | 130                    | 11.4                                | 7.5                                    | 116           | 18.0                                          | 6.37                       | 11.2                                          | 4.09                       |
| 13  | 285       | 23     | 112                    | 11.0                                | 8.0                                    | 169           | 7.8                                           | 3.51                       | 5.4                                           | 2.43                       |
| 14  | 285       | 24     | 112                    | 8.3                                 | 6.0                                    | 169           | 6.5                                           | 3.36                       | 4.7                                           | 2.43                       |
| 15  | 285       | 50     | 112                    | 9.0                                 | 11.5                                   | 163           | 17.0                                          | 8.98                       | 15.2                                          | 7.50                       |
| 16  | 285       | 28     | 80                     | 10.0                                | 8.5                                    | 116           | 4.5                                           | 2.51                       | 3.5                                           | 2.12                       |
| 17  | 285       | 50     | 66                     | 9.2                                 | 11.5                                   | 163           | 14.5                                          | 11.90                      | 12.0                                          | 10.10                      |
| 18  | 285       | 30     | 66                     | 11.0                                | 12.0                                   | 116           | 5.8                                           | 5.80                       | 3.5                                           | 2.67                       |
| 19  | 285       | 24     | 8                      | 12.0                                | 6.3                                    | 169           | 1.8                                           | 10.40                      | 0.9                                           | 5.26                       |
| 20  | 280       | 31     | 130                    | 7.4                                 | 7.0                                    | 116           | 14.0                                          | 5.14                       | 11.3                                          | 4.34                       |
| 21  | 280       | 24     | 112                    | 8.7                                 | 9.0                                    | 169           | 15.7                                          | 8.00                       | 12.4                                          | 6.32                       |
| 22  | 280       | 24     | 66                     | 8.1                                 | 9.0                                    | 169           | 10.0                                          | 9.10                       | 7.2                                           | 6.55                       |
| 23  | 280       | 32     | 62                     | 9.8                                 | 7.0                                    | 116           | 6.3                                           | 4.50                       | 4.9                                           | 3.51                       |
| 24  | 280       | 24     | 8                      | 10.0                                | 9.0                                    | 169           | 2.5                                           | 15.90                      | 1.5                                           | 9.36                       |

\*Mobility diameter (mode)

<sup>1</sup> Values calculated from HR-ToF-AMS data analysis

<sup>2</sup> Values calculated from CHARON/PTR-ToF-MS data analysis

**Table S2: Reference compounds ion distribution at 100 Td drift conditions, drift temperature 393 K and pressure 2.2 Torr. CHARON PTR-ToF-MS reference experiments were carried out by dissolving (when possible) the target reference compound in water then nebulized.**

| Compound                 | Molecular formula                             | MW (g/mol) | PTR-MS     |         | CHARON     |                |
|--------------------------|-----------------------------------------------|------------|------------|---------|------------|----------------|
|                          |                                               |            | <i>m/z</i> | % Yield | <i>m/z</i> | % Yield        |
| Formic acid              | HCOOH                                         | 46.03      | 47.01      | 100     | 47.01      | 100            |
| Methyl glyoxal           | C <sub>3</sub> H <sub>4</sub> O <sub>2</sub>  | 72.06      | n.d.       | n.d.    | 73.03      | 87             |
|                          |                                               |            |            |         | 45.03      | 13             |
| Butanal                  | C <sub>4</sub> H <sub>8</sub> O               | 72.11      | 73.06      | 16      | n.d.       | n.d.           |
|                          |                                               |            | 55.05      | 84      |            |                |
| Pentanal                 | C <sub>5</sub> H <sub>10</sub> O              | 86.13      | 87.08      | 14      | n.d.       | n.d.           |
|                          |                                               |            | 69.06      | 86      |            |                |
| Furaldehyde              | C <sub>5</sub> H <sub>4</sub> O <sub>2</sub>  | 96.08      | 97.03      | 100     | n.d.       | n.d.           |
| Maleic Anhydride         | C <sub>4</sub> H <sub>3</sub> O <sub>2</sub>  | 98.06      | 99.01      | 100     | 99.01      | 95             |
|                          |                                               |            |            |         | 117.02     | 5<br>(hydrate) |
| Benzaldehyde             | C <sub>7</sub> H <sub>6</sub> O               | 106.12     | 107.05     | 100     | n.d.       | n.d.           |
| Benzoquinone             | C <sub>6</sub> H <sub>4</sub> O <sub>2</sub>  | 108.09     | 109.03     | 100     | 109.03     | 100            |
| Cresol                   | C <sub>7</sub> H <sub>8</sub> O               | 108.14     | 109.06     | 100     | n.d.       | n.d.           |
| 5-Methylfurfural         | C <sub>6</sub> H <sub>6</sub> O <sub>2</sub>  | 110.11     | 111.04     | 100     | 111.04     | 100            |
| Succinic acid            | C <sub>4</sub> H <sub>6</sub> O <sub>4</sub>  | 118.09     | n.d.       | n.d.    | 119.03     | 2              |
|                          |                                               |            |            |         | 101.02     | 98             |
| 5-Hydroxymethyl furfural | C <sub>6</sub> H <sub>6</sub> O <sub>3</sub>  | 126.11     | 127.04     | 80      | n.d.       | n.d.           |
|                          |                                               |            | 109.03     | 20      |            |                |
| 4-Nitrotoluene           | C <sub>7</sub> H <sub>7</sub> NO <sub>2</sub> | 137.14     | 138.06     | 100     | n.d.       | n.d.           |
| 4-Nitrophenol            | C <sub>6</sub> H <sub>5</sub> NO <sub>3</sub> | 139.11     | 140.04     | 100     | 140.04     | 100            |
| 4-Nitrocatechol          | C <sub>6</sub> H <sub>5</sub> NO <sub>4</sub> | 155.11     | 156.03     | 100     | 156.03     | 91             |
|                          |                                               |            |            |         | 125.03     | 9              |

**Table S3.1: Derived logCi values and ion major identified parent and fragment ions.**

| Carbon number | Identified <i>m/z</i> and protonated molecular formula                    | Log Ci* at 295 K | Log Ci* at 280 K | ΔLog Ci* |
|---------------|---------------------------------------------------------------------------|------------------|------------------|----------|
| 7             | 107.049 (C <sub>7</sub> H <sub>6</sub> O)H <sup>+</sup>                   | 4.28±0.08        | 3.09±0.11        | 0.37     |
| 7             | 123.046 (C <sub>7</sub> H <sub>6</sub> O <sub>2</sub> )H <sup>+</sup>     | 3.46±0.11        | 2.88±0.14        | 0.59     |
| 7             | 139.040 (C <sub>7</sub> H <sub>6</sub> O <sub>3</sub> )H <sup>+</sup>     | 2.19±0.07        | 1.75±0.11        | 0.47     |
| 7             | 141.054 (C <sub>7</sub> H <sub>8</sub> O <sub>3</sub> )H <sup>+</sup>     | 1.88±0.14        | 1.33±0.10        | 0.55     |
| 7             | 155.034 (C <sub>7</sub> H <sub>6</sub> O <sub>4</sub> )H <sup>+</sup>     | 1.62±0.14        | 0.90±0.11        | 0.70     |
| 7             | 157.050 (C <sub>7</sub> H <sub>8</sub> O <sub>4</sub> )H                  | 1.37±0.50        | 1.08±0.17        | 0.29     |
| 7             | 171.029(C <sub>7</sub> H <sub>6</sub> O <sub>5</sub> )H <sup>+</sup>      | 1.45±0.60        | 0.70±0.10        | 0.75     |
| 6             | 127.041 (C <sub>6</sub> H <sub>6</sub> O <sub>3</sub> )H <sup>+</sup>     | 1.46±0.25        | 0.83±0.05        | 0.63     |
| 6             | 143.034 (C <sub>6</sub> H <sub>6</sub> O <sub>4</sub> ) H <sup>+</sup>    | 1.26±0.03        | 0.93±0.02        | 0.33     |
| 6             | 125.029 (C <sub>6</sub> H <sub>4</sub> O <sub>2</sub> ) H <sup>+</sup>    | 1.40±0.30        | 1.10±0.30        | 0.30     |
| 6             | 129.057 (C <sub>6</sub> H <sub>8</sub> O <sub>3</sub> )H <sup>+</sup>     | 1.62±0.13        | 1.07±0.02        | 0.55     |
| 6             | 111.045 (C <sub>6</sub> H <sub>6</sub> O <sub>2</sub> )H <sup>+</sup>     | 2.10±0.03        | 1.56±0.05        | 0.55     |
| 6             | 140.039<br>(C <sub>6</sub> H <sub>5</sub> NO <sub>3</sub> )H <sup>+</sup> | 3.10±0.24        | 2.70±0.15        | 0.40     |
| 6             | 113.057(C <sub>6</sub> H <sub>8</sub> O <sub>2</sub> )H <sup>+</sup>      | 2.71±0.35        | 1.64±0.25        | 1.07     |
| 6             | 141.019 (C <sub>6</sub> H <sub>4</sub> O <sub>4</sub> )H <sup>+</sup>     | 1.75±0.13        | 1.38±0.03        | 0.37     |
| 6             | 95.050 (C <sub>6</sub> H <sub>6</sub> O)H <sup>+</sup>                    | 2.60±0.20        | 2.08±0.05        | 0.52     |
| 6             | 109.030 (C <sub>6</sub> H <sub>4</sub> O <sub>2</sub> )H <sup>+</sup>     | 3.04±0.16        | 2.72±0.10        | 0.32     |
| 5             | 115.042 (C <sub>5</sub> H <sub>6</sub> O <sub>3</sub> )H <sup>+</sup>     | 1.81±0.34        | 1.43±0.02        | 0.39     |
| 5             | 101.060 (C <sub>5</sub> H <sub>8</sub> O <sub>2</sub> )H <sup>+</sup>     | 4.75±0.94        | 4.25±0.34        | 0.50     |
| 5             | 113.025 (C <sub>5</sub> H <sub>4</sub> O <sub>3</sub> )H <sup>+</sup>     | 2.69±0.36        | 2.41±0.14        | 0.28     |
| 5             | 99.046 (C <sub>5</sub> H <sub>6</sub> O <sub>2</sub> )H <sup>+</sup>      | 2.62±0.13        | 2.19±0.05        | 0.43     |
| 4             | 117.021 (C <sub>4</sub> H <sub>4</sub> O <sub>4</sub> )H <sup>+</sup>     | 2.50±0.60        | 1.89±0.05        | 0.65     |
| 4             | 103.042 (C <sub>4</sub> H <sub>6</sub> O <sub>3</sub> )H <sup>+</sup>     | 1.69±0.02        | 1.21±0.04        | 0.47     |
| 4             | 85.031 (C <sub>4</sub> H <sub>4</sub> O <sub>2</sub> )H <sup>+</sup>      | 2.66±0.12        | 2.29±0.05        | 0.38     |
| 4             | 87.046 (C <sub>4</sub> H <sub>6</sub> O <sub>2</sub> )H <sup>+</sup>      | 2.59±0.11        | 2.03±0.03        | 0.56     |
| 4             | 101.026 (C <sub>4</sub> H <sub>4</sub> O <sub>3</sub> )H <sup>+</sup>     | 2.35±0.24        | 1.87±0.04        | 0.48     |
| 4             | 83.014 (C <sub>4</sub> H <sub>2</sub> O <sub>2</sub> )H <sup>+</sup>      | 2.30±0.61        | 1.78±0.22        | 0.52     |
| 3             | 89.026 (C <sub>3</sub> H <sub>4</sub> O <sub>3</sub> )H <sup>+</sup>      | 2.24±0.11        | 1.83±0.02        | 0.42     |
| 3             | 71.015(C <sub>3</sub> H <sub>2</sub> O <sub>2</sub> )H <sup>+</sup>       | 1.99±0.27        | 1.83±0.02        | 0.16     |
| 3             | 75.043 (C <sub>3</sub> H <sub>6</sub> O <sub>2</sub> )H <sup>+</sup>      | 4.40±0.52        | 2.55±0.19        | 0.85     |
| 3             | 73.030 (C <sub>3</sub> H <sub>4</sub> O <sub>2</sub> )H <sup>+</sup>      | 2.85±0.02        | 2.55±0.08        | 0.30     |
| 2             | 77.025 (C <sub>2</sub> H <sub>4</sub> O <sub>3</sub> )H <sup>+</sup>      | 3.88±0.18        | 3.52±0.06        | 0.36     |
| 2             | 61.028 (C <sub>2</sub> H <sub>4</sub> O <sub>2</sub> )H <sup>+</sup>      | 3.76±0.49        | 3.04±0.06        | 0.72     |
| 1             | 47.013 (CH <sub>2</sub> O <sub>2</sub> )H <sup>+</sup>                    | 3.63±0.32        | 3.32±0.09        | 0.31     |

**Table S3.2: Derived K<sub>pi</sub> values and ion major identified parent and fragment ions.**

| Carbon number | Identified <i>m/z</i> and protonated molecular formula                    | K <sub>pi</sub> × 10 <sup>-3</sup> at 295 K | K <sub>pi</sub> × 10 <sup>-3</sup> at 280 K |
|---------------|---------------------------------------------------------------------------|---------------------------------------------|---------------------------------------------|
| 7             | 107.049 (C <sub>7</sub> H <sub>6</sub> O)H <sup>+</sup>                   | 0.05                                        | 0.12                                        |
| 7             | 123.046 (C <sub>7</sub> H <sub>6</sub> O <sub>2</sub> )H <sup>+</sup>     | 0.34                                        | 1.33                                        |
| 7             | 139.040 (C <sub>7</sub> H <sub>6</sub> O <sub>3</sub> )H <sup>+</sup>     | 6.5                                         | 19.3                                        |
| 7             | 141.054 (C <sub>7</sub> H <sub>8</sub> O <sub>3</sub> )H <sup>+</sup>     | 13.1                                        | 46.0                                        |
| 7             | 155.034 (C <sub>7</sub> H <sub>6</sub> O <sub>4</sub> )H <sup>+</sup>     | 24.2                                        | 120                                         |
| 7             | 157.050 (C <sub>7</sub> H <sub>8</sub> O <sub>4</sub> )H                  | 42.8                                        | 82.5                                        |
| 7             | 171.029(C <sub>7</sub> H <sub>6</sub> O <sub>5</sub> )H <sup>+</sup>      | 84.9                                        | 160.0                                       |
| 6             | 127.041 (C <sub>6</sub> H <sub>6</sub> O <sub>3</sub> )H <sup>+</sup>     | 55.9                                        | 128.0                                       |
| 6             | 143.034 (C <sub>6</sub> H <sub>6</sub> O <sub>4</sub> ) H <sup>+</sup>    | 54.5                                        | 116.0                                       |
| 6             | 125.029 (C <sub>6</sub> H <sub>4</sub> O <sub>2</sub> ) H <sup>+</sup>    | 39.8                                        | 61.7                                        |
| 6             | 129.057 (C <sub>6</sub> H <sub>8</sub> O <sub>3</sub> )H <sup>+</sup>     | 23.9                                        | 84.1                                        |
| 6             | 111.045 (C <sub>6</sub> H <sub>6</sub> O <sub>2</sub> )H <sup>+</sup>     | 7.9                                         | 28.1                                        |
| 6             | 140.039<br>(C <sub>6</sub> H <sub>5</sub> NO <sub>3</sub> )H <sup>+</sup> | 0.83                                        | 1.96                                        |
| 6             | 113.057(C <sub>6</sub> H <sub>8</sub> O <sub>2</sub> )H <sup>+</sup>      | 3.9                                         | 22.5                                        |
| 6             | 141.019 (C <sub>6</sub> H <sub>4</sub> O <sub>4</sub> )H <sup>+</sup>     | 17.6                                        | 40.3                                        |
| 6             | 95.050 (C <sub>6</sub> H <sub>6</sub> O)H <sup>+</sup>                    | 2.4                                         | 8.1                                         |
| 6             | 109.030 (C <sub>6</sub> H <sub>4</sub> O <sub>2</sub> )H <sup>+</sup>     | 0.9                                         | 1.8                                         |
| 5             | 115.042 (C <sub>5</sub> H <sub>6</sub> O <sub>3</sub> )H <sup>+</sup>     | 15.4                                        | 36.4                                        |
| 5             | 113.025 (C <sub>5</sub> H <sub>4</sub> O <sub>3</sub> )H <sup>+</sup>     | 2.3                                         | 3.8                                         |
| 5             | 99.046 (C <sub>5</sub> H <sub>6</sub> O <sub>2</sub> )H <sup>+</sup>      | 2.4                                         | 6.4                                         |
| 4             | 117.021 (C <sub>4</sub> H <sub>4</sub> O <sub>4</sub> )H <sup>+</sup>     | 3.1                                         | 13.8                                        |
| 4             | 103.042 (C <sub>4</sub> H <sub>6</sub> O <sub>3</sub> )H <sup>+</sup>     | 20.4                                        | 60.5                                        |
| 4             | 85.031 (C <sub>4</sub> H <sub>4</sub> O <sub>2</sub> )H <sup>+</sup>      | 2.2                                         | 5.2                                         |
| 4             | 87.046 (C <sub>4</sub> H <sub>6</sub> O <sub>2</sub> )H <sup>+</sup>      | 2.6                                         | 9.4                                         |
| 4             | 101.026 (C <sub>4</sub> H <sub>4</sub> O <sub>3</sub> )H <sup>+</sup>     | 6.9                                         | 13.3                                        |
| 4             | 83.014 (C <sub>4</sub> H <sub>2</sub> O <sub>2</sub> )H <sup>+</sup>      | 20.2                                        | 16.4                                        |
| 3             | 89.026 (C <sub>3</sub> H <sub>4</sub> O <sub>3</sub> )H <sup>+</sup>      | 5.5                                         | 14.7                                        |
| 3             | 71.015(C <sub>3</sub> H <sub>2</sub> O <sub>2</sub> )H <sup>+</sup>       | 5.6                                         | 24.5                                        |
| 3             | 75.043 (C <sub>3</sub> H <sub>6</sub> O <sub>2</sub> )H <sup>+</sup>      | 3.4                                         | 2.7                                         |
| 3             | 73.030 (C <sub>3</sub> H <sub>4</sub> O <sub>2</sub> )H <sup>+</sup>      | 1.4                                         | 2.1                                         |
| 2             | 77.025 (C <sub>2</sub> H <sub>4</sub> O <sub>3</sub> )H <sup>+</sup>      | 0.1                                         | 0.3                                         |
| 2             | 61.028 (C <sub>2</sub> H <sub>4</sub> O <sub>2</sub> )H <sup>+</sup>      | 0.8                                         | 0.9                                         |
| 1             | 47.013 (CH <sub>2</sub> O <sub>2</sub> )H <sup>+</sup>                    | 0.4                                         | 0.5                                         |

## Part 2: Modeling and chemical mechanisms

### Wall losses

A wall loss parameterization of gaseous organic compounds is implemented in SSH-aerosol for the modeling partitioning study of this work. In the absence of wall loss studies in Pyrex AFT, this parameterization follows the approach developed for Teflon chamber studies (Zhang et al., 2015; Huang et al., 2018; Krechmer et al., 2016). The parametrization represents an irreversible first-order process whose kinetics  $k_{wall,i}$  (in  $s^{-1}$ ) for the species  $i$  is calculated according to Eq. (S1):

$$k_{wall,i} = \left(\frac{A}{V}\right) \left(\frac{\pi}{2} \frac{1}{\sqrt{k_e D_g}} + \frac{4}{\alpha_{w,i} \bar{c}_i}\right)^{-1}, \quad (S1)$$

where  $A$  and  $V$  are the area (in  $m^2$ ) and volume (in  $m^3$ ) of the AFT,  $\alpha_{w,i}$  and  $\bar{c}_i$  are the wall accommodation coefficient and the mean molecular velocity (in  $m s^{-1}$ ) of the species  $i$  and  $k_e$  and  $D_g$  are the eddy diffusivity coefficient (in  $s^{-1}$ ) and the diffusivity in the gas phase (in  $m^2 s^{-1}$ ).  $D_g$  is taken equal to  $5 \times 10^{-6} s^{-1}$ ,  $k_e$  depends on the volume of the AFT and is calculated as:

$$k_e = 0.004 + 10^{-2.25} (V)^{0.74}, \quad (S2)$$

and  $\bar{c}_i$  depends on the molar mass  $M_i$  ( $kg mol^{-1}$ ) of species  $i$ :

$$\bar{c}_i = \sqrt{\frac{8RT}{\pi M_i}}, \quad (S3)$$

where  $R$  is the gas constant ( $R = 8,314 kg m^2 s^{-2} K^{-1} mol^{-1}$ ),  $T$  is the temperature (in  $K$ ).  $\alpha_{w,i}$  depends on the saturation concentration  $C_i^*$  (in  $\mu g m^{-3}$ ) of the species  $i$  according to the Eq. (S4) and Eq. (S5) do the link between  $C_i^*$  and  $P_i^{sat}$ :

$$\alpha_{w,i} = 10^a (C_i^*)^b, \quad (S4)$$

$$C_i^* = \frac{M_i \gamma_i P_i^{sat} \times 10^9}{RT}, \quad (S5)$$

with  $P_i^{sat}$  in Pa and where  $\gamma_i$  is the activity coefficient of the species  $i$  in the condensed phase (considered equal to 1 for this equation).  $a$  and  $b$  are tuning parameters.  $a$  is set to  $-2.744$  as in Huang et al. (2018) for teflon chambers.  $b$  is here set to  $-1.407$  so that the parameterization correctly reproduces the final SOA concentration of the studied case and allows the analysis of wall losses on the speciation and distribution of secondary organic compounds.

### Irreversible partitioning of methylglyoxal

The oxidation of methylglyoxal in or at the surface of the aqueous phase can be considered as an irreversible gas-particle partitioning pathway as opposed to the reversible processes that are self-oligomerization and hydration (Hu et al., 2022). A simplified parametrization to represent the irreversible gas-particle partitioning of methylglyoxal depending on RH is also tested in the modeling partitioning study of this work. This empiric parameterization is based on effective uptake rates ( $k_{eff,uptake}$ ) calculated with atmospheric observation values by Hu et al. (2022) for high RH cases ( $RH >$

40%) and with experimental values by De Haan et al. (2018) for low RH cases (RH < 5%). A third-degree polynomial is fitted on experimental  $k_{\text{eff,uptake}}$  to establish the RH dependency used in this study. The empiric fit is here used to roughly estimate the  $k_{\text{eff,uptake}}$  for the intermediate RH value of 24% of the simulated experiment. Polynomial and experimental  $k_{\text{eff,uptake}}$  are presented in Fig. S7.

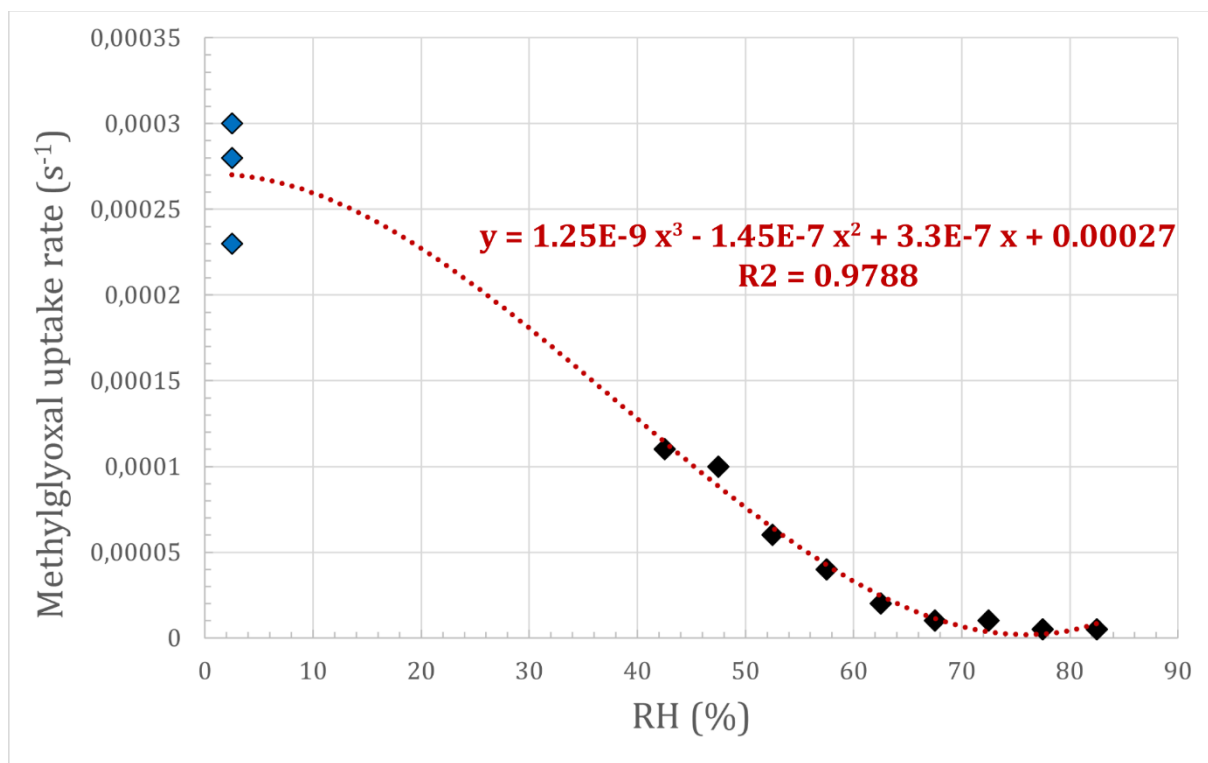

**Figure S7: Experimental RH dependence of irreversible uptake rate of methylglyoxal. Blue points are from De Haan et al. (2018) and black points are from Hu et al. (2022).**

## Results and figures

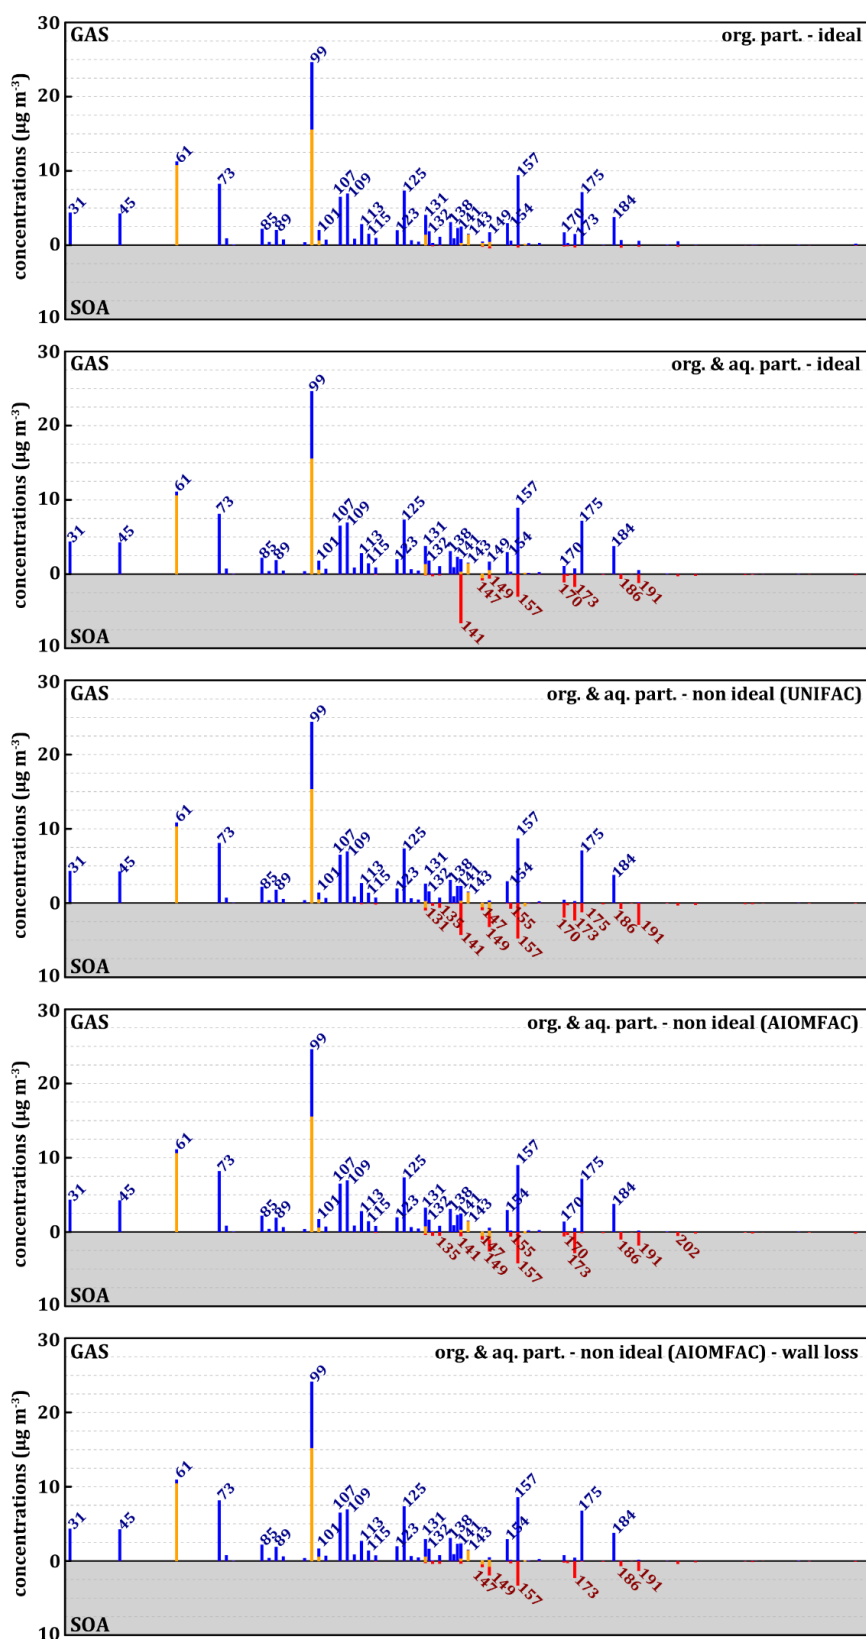

Figure S8: Mass spectra of gaseous (blue) and condensed (red) secondary compounds formed after 13 minutes of toluene oxidation under experimental conditions (see sect. 2.2.4) according to

MG-Cr-Al mechanism for the different partitioning tests. Yellow fraction of spectra represents recalculated mass after removing of functional groups with nitrogen for aliphatic compounds.

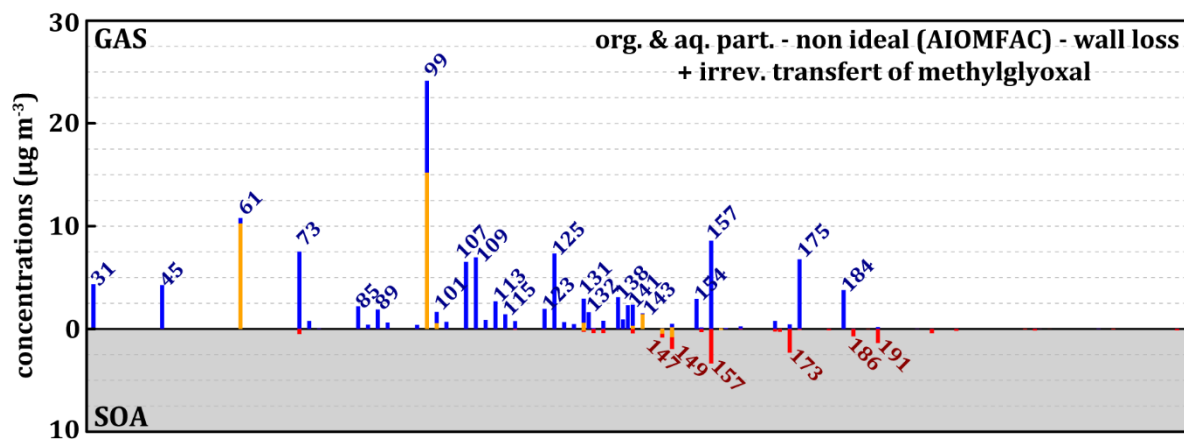

Figure S9: Mass spectra of gaseous (blue) and condensed (red) secondary compounds formed after 13 minutes of toluene oxidation under experimental conditions (see sect. 2.2.4) according to MG-Cr-Al mechanism considering partitioning both organic and aqueous phases with interactions between uncharged organic molecules in both condensed phases and interactions of organic molecules with inorganic ions in aqueous one only, wall losses of gaseous organic compounds and irreversible transfer to aqueous phase for methylglyoxal. Yellow fraction of spectra represents recalculated mass after removing of functional groups with nitrogen for aliphatic compounds.



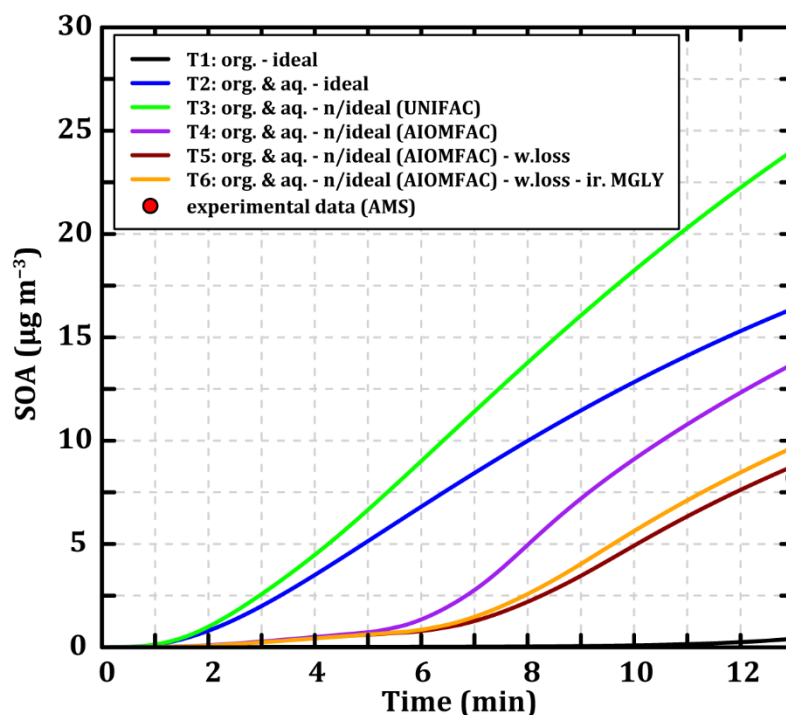

Figure S10: Temporal evolution of the SOA concentrations during toluene oxidation under experimental conditions (see sect. 2.2.3) simulated with MG-Cr-Al mechanism at 295 K considering mass transfer through an ideal organic phase (T1, black line), ideal organic and aqueous phases (T2, blue line), organic and aqueous phases with interactions between organic molecules (T3, green line), organic and aqueous phases with interactions between organic molecules and inorganic ions (T4, purple line), organic and aqueous phases with interactions between organic molecules and inorganic ions and wall losses (T5, dark red line) and organic and aqueous phases with interactions between organic molecules and inorganic ions, wall losses and irreversible pathway for methylglyoxal condensation (T6, orange line). The red point represents the experimental SOA concentration measured by AMS.

## Detailed Chemical mechanisms

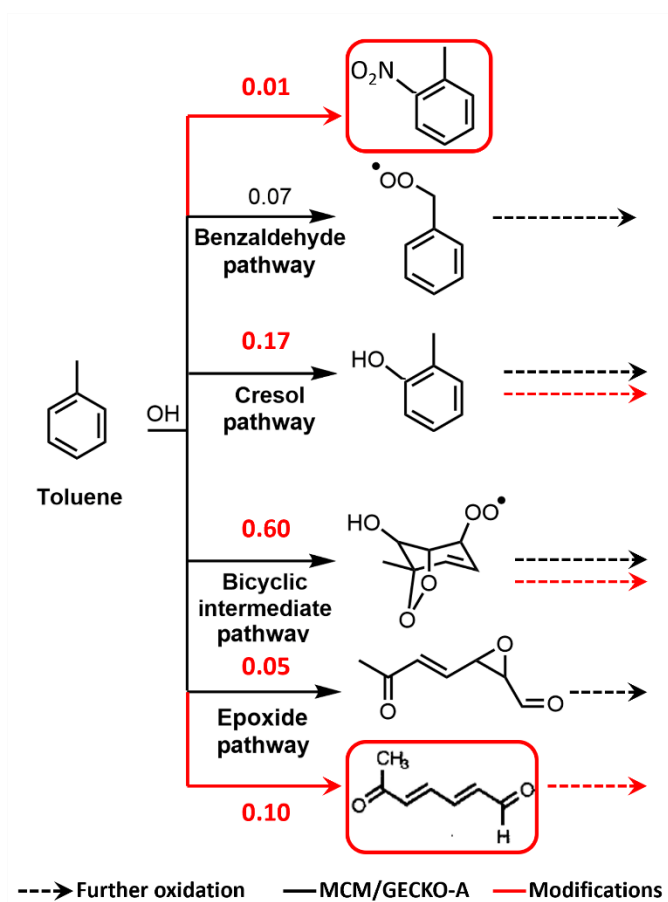

Figure S11: First oxidation step of MG-Cr-Al toluene + OH oxidation mechanism.

**Table S4: Species list of MG-Cr-Al chemical mechanism.**

| name   | molecule (or position isomer) | name   | molecule (or position isomer) |
|--------|-------------------------------|--------|-------------------------------|
| 1D4000 |                               | 2D5002 |                               |
| 1D4001 |                               | 2D5003 |                               |
| 1D5000 |                               | 2D6000 |                               |
| 1D5001 |                               | 2D6001 |                               |
| 1D5003 |                               | 2D7000 |                               |
| 1D6000 |                               | 2G5006 |                               |
| 1D6001 |                               | 2P5000 |                               |
| 1D7000 |                               | 2P5006 |                               |
| 1P5006 |                               | 2P500A |                               |
| 1P500A |                               | 2U6000 |                               |
| 1U6000 |                               | 2U7000 |                               |
| 1U7000 |                               | 3H5000 |                               |
| 2D4000 |                               | 3H5004 |                               |
| 2D5000 |                               | 3H5009 |                               |
| 2D5001 |                               | 3K2000 |                               |

| name   | molecule (or position isomer) | name   | molecule (or position isomer) |
|--------|-------------------------------|--------|-------------------------------|
| 3K5003 |                               | AK5000 |                               |
| 3P4000 |                               | AR0010 |                               |
| 3P400X |                               | AR0013 |                               |
| 3U5000 |                               | AR0020 |                               |
| 3U5001 |                               | AR0027 |                               |
| 3U5002 |                               | AR0028 |                               |
| 3U7000 |                               | AR0035 |                               |
| A02000 |                               | AR0038 |                               |
| AA2000 |                               | AR0039 |                               |
| AA4000 |                               | AR0040 |                               |
| AD2000 |                               | AR0042 |                               |
| AD4000 |                               | AR0043 |                               |
| AD4001 |                               | AR0048 |                               |
| AD5000 |                               | AR0080 |                               |
| AK3000 |                               | AR0085 |                               |

| name   | molecule (or position isomer) | name   | molecule (or position isomer) |
|--------|-------------------------------|--------|-------------------------------|
| AR0086 |                               | AR0101 |                               |
| AR0087 |                               | AR0102 |                               |
| AR0088 |                               | AR0104 |                               |
| AR0089 |                               | AR0105 |                               |
| AR0090 |                               | AR0106 |                               |
| AR0091 |                               | AR0107 |                               |
| AR0092 |                               | AR0108 |                               |
| AR0093 |                               | AR0109 |                               |
| AR0094 |                               | AR0110 |                               |
| AR0095 |                               | AR0111 |                               |
| AR0096 |                               | AR0112 |                               |
| AR0097 |                               | AR0113 |                               |
| AR0098 |                               | AR0114 |                               |
| AR0099 |                               | AR0115 |                               |
| AR0100 |                               | AR0116 |                               |

excited version of  
AR0111

| name   | molecule (or position isomer) | name      | molecule (or position isomer) |
|--------|-------------------------------|-----------|-------------------------------|
| AR0117 |                               | AR0134    |                               |
| AR0118 |                               | AR0138    |                               |
| AR0119 |                               | AR0140    |                               |
| AR0120 |                               | AR014010  |                               |
| AR0121 |                               | AR0140OOH |                               |
| AR0124 |                               | AR0141    |                               |
| AR0125 |                               | AR0142    |                               |
| AR0126 |                               | AR0144    |                               |
| AR0127 |                               | AR0152    |                               |
| AR0128 |                               | AR0153    |                               |
| AR0129 |                               | AU4000    |                               |
| AR0130 |                               | AU5000    |                               |
| AR0131 |                               | AU5002    |                               |
| AR0132 |                               | AU50DN    |                               |
| AR0133 |                               | AU6000    |                               |

| name       | molecule (or position isomer) | name      | molecule (or position isomer) |
|------------|-------------------------------|-----------|-------------------------------|
| AU7000     |                               | D02000    |                               |
| BTOL2OH1O  |                               | DD2000    |                               |
| BTOL3OH1O  |                               | DD3000    |                               |
| BTOL3OH2O  |                               | DD3001    |                               |
| BTOL3OHOOH |                               | DD5002    |                               |
| BTOL4OH1O  |                               | DK3000    |                               |
| BTOL4OH2O  |                               | DK4000    |                               |
| BTOL4OHOOH |                               | DK4001    |                               |
| BTOL5OH1O  |                               | DK5000    |                               |
| BTOL5OH2O  |                               | ED4001    |                               |
| BTOL5OHOOH |                               | ED5000    |                               |
| BZALDOH    |                               | ED5000OOH |                               |
| C73K1OH2O  |                               | ED5002OOH |                               |
| C73K1OHOOH |                               | FUROH     |                               |
| CH2O       |                               | FURON     |                               |

Same as AR0114  
(intermediate model  
species use to simplify  
the mechanism)

| name       | molecule (or position isomer)                                                       | name      | molecule (or position isomer)                                                        |
|------------|-------------------------------------------------------------------------------------|-----------|--------------------------------------------------------------------------------------|
| FURR3      | 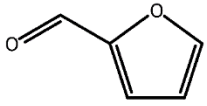   | MALAHY    |    |
| FURR5      |    | MBQN1K1OH |    |
| FURR6      |    | MBQN1OH   |    |
| FURR6OHOOH |    | MBQN2OH   |    |
| GH5002     |    | MBQN3OH   |    |
| GU5002     |   | Me6Cy1U3K |   |
| HD2000     |  | MFUR      |  |
| HD5000     |  | NTOL      |  |
| HD5001     |  | P02000    |  |
| HOM1O      |  | PD5002    |  |
| HOM1ONO2   |  | PH5000    |  |
| HOM1OOH    |  | PH5002    |  |
| HOM2O      |  | PH5004    |  |
| HOM2ONO2   |  | PK5001    |  |
| HOM2OOH    |  | PK5003    |  |



| name      | molecule (or position isomer) | name       | molecule (or position isomer) |
|-----------|-------------------------------|------------|-------------------------------|
| PP4000    |                               | TOL3OH     |                               |
| PP4004    |                               | TOL3OH1NO2 |                               |
| PU5000    |                               | TOL3OH1O   |                               |
| PU5001    |                               | TOL3OH2O   |                               |
| PU5002    |                               | TOL3OHOOH  |                               |
| radED4001 |                               | TOL4OH     |                               |
| radED5000 |                               | TOL4OH1NO2 |                               |
| radED5002 |                               | TOL5OH     |                               |
| radFURR6  |                               | UD4000     |                               |
| radHOM7O  |                               | UD5000     |                               |
| radHOM9O  |                               | UD5001     |                               |
| TOL       |                               | UD5002     |                               |
| TOL2OH1O  |                               | UD6000     |                               |
| TOL2OH2O  |                               | UD7000     |                               |
| TOL2OHOOH |                               | UU7000     |                               |

**Table S5: MG-Cr-Al chemical mechanism.**

| reaction ID                           | reaction                                                                                     | kinetic type | kinetic values                                |
|---------------------------------------|----------------------------------------------------------------------------------------------|--------------|-----------------------------------------------|
| <b>BLOC 0 : TOLUENE</b>               |                                                                                              |              |                                               |
| B0-001                                | TOL + HO → 0.60 AR0086 + 0.07 AR0085 + .1674 AR0088 + 0.05 AR0087 + 0.10 UU7000 + .0126 NTOL | ARR2         | 1.814E-12 -338.                               |
| <b>BLOC 1 : METHYL ATTACK PATHWAY</b> |                                                                                              |              |                                               |
| B1-001                                | AR0085 + NO → 0.89 AR0089 + 0.11 AR0090                                                      | ARR2         | 2.537E-12 -360.                               |
| B1-002                                | AR0085 + NO3 → AR0089                                                                        | ARR1         | 0.250E-11                                     |
| B1-003                                | AR0085 + HO2 → AR0091                                                                        | ARR2         | 0.239E-12 -1300.                              |
| B1-004                                | AR0089 → AR0102                                                                              | ARR2(O2)     | 0.370E-13 460.                                |
| B1-005                                | AR0090 → AR0089                                                                              | PHOTO        | 2.2176E-06                                    |
| B1-006                                | AR0090 + HO → AR0102                                                                         | ARR1         | 0.603E-11                                     |
| B1-007                                | AR0091 → AR0089                                                                              | PHOTO        | 6.3472E-06                                    |
| B1-008                                | AR0091 + HO → AR0102                                                                         | ARR1         | 0.205E-10                                     |
| B1-009                                | AR0102 + HO → AR0120                                                                         | ARR1         | 0.129E-10                                     |
| B1-010                                | AR0102 + NO3 → AR0120                                                                        | ARR1         | 0.240E-14                                     |
| B1-011                                | AR0102 → AR0028                                                                              | PHOTO        | 1.0557E-05                                    |
| B1-012                                | AR0102 → AR0120                                                                              | PHOTO        | 1.0556E-05                                    |
| B1-013                                | AR0120 + NO → AR0028                                                                         | ARR2         | 0.810E-11 -270.                               |
| B1-014                                | AR0120 + NO3 → AR0028                                                                        | ARR1         | 0.400E-11                                     |
| B1-015                                | AR0120 + NO2 → AR0130                                                                        | TROE5        | 0.270E-27 7.1 0.120E-10 0.9 0.3               |
| B1-016                                | AR0120 + HO2 → 0.71 AR0131 + 0.29 AR0132                                                     | ARR2         | 0.430E-12 -1040.                              |
| B1-017                                | AR0130 → AR0120                                                                              | TROE7        | 0.328E-02 12100. 0.0 0.268E+17 13600. 0.0 0.3 |
| B1-018                                | AR0130 + HO → AR0043                                                                         | ARR1         | 0.106E-11                                     |
| B1-019                                | AR0131 → AR0028                                                                              | PHOTO        | 6.3472E-06                                    |
| B1-020                                | AR0131 + HO → AR0120                                                                         | ARR1         | 0.466E-11                                     |
| B1-021                                | AR0028 + NO → AR0013                                                                         | ARR2         | 0.254E-11 -360.                               |
| B1-022                                | AR0028 + NO3 → AR0013                                                                        | ARR1         | 0.250E-11                                     |
| B1-023                                | AR0028 + HO2 → AR0043                                                                        | ARR1         | 0.224E-12 -1300.                              |
| B1-024                                | AR0043 → AR0013                                                                              | PHOTO        | 6.3472E-06                                    |
| B1-025                                | AR0043 + HO → AR0028                                                                         | ARR1         | 0.360E-11                                     |
| B1-026                                | AR0013 + NO2 → AR0027                                                                        | ARR1         | 0.208E-11                                     |
| B1-027                                | AR0013 + O3 → AR0028                                                                         | ARR1         | 0.286E-12                                     |
| B1-028                                | AR0027 + HO → AR0042                                                                         | ARR1         | 0.900E-12                                     |
| B1-029                                | AR0027 + NO3 → AR0042                                                                        | ARR1         | 0.900E-13                                     |
| B1-030                                | AR0132 + HO → AR0028                                                                         | ARR1         | 0.110E-11                                     |
| <b>BLOC 2 : CRESOL PATHWAY</b>        |                                                                                              |              |                                               |
| B2-001                                | AR0088 + HO → 0.068 AR0098 + 0.186 AR0099 + 0.676 AR0100 + 0.07 BZALDOH                      | ARR1         | 4.649E-11                                     |
| B2-002                                | AR0088 + NO3 → 0.39 AR0098 + 0.10 AR0099 + 0.51 AR0101                                       | ARR1         | 1.250E-11                                     |
| B2-003                                | AR0098 + O3 → AR0112                                                                         | ARR1         | 0.286E-12                                     |
| B2-004                                | AR0098 + NO2 → AR0113                                                                        | ARR1         | 0.208E-11                                     |
| B2-005                                | AR0099 + NO → AR0114                                                                         | ARR2         | 0.254E-11 -360.                               |
| B2-006                                | AR0099 + NO3 → AR0114                                                                        | ARR1         | 0.250E-11                                     |
| B2-007                                | AR0099 + HO2 → 0.35 AR0115 + 0.65 AR0114                                                     | ARR2         | 0.239E-12 -1300.                              |
| B2-008                                | AR0112 + NO → AR0098                                                                         | ARR2         | 0.254E-11 -360.                               |
| B2-009                                | AR0112 + NO3 → AR0098                                                                        | ARR1         | 0.250E-11                                     |
| B2-010                                | AR0112 + HO2 → AR0125                                                                        | ARR2         | 0.239E-12 -1300.                              |
| B2-011                                | AR0125 + HO → AR0112                                                                         | ARR1         | 0.465E-10                                     |

|        |                    |                                                                                                                                                                                                    |       |                  |
|--------|--------------------|----------------------------------------------------------------------------------------------------------------------------------------------------------------------------------------------------|-------|------------------|
| B2-012 | AR0125             | → AR0098                                                                                                                                                                                           | PHOTO | 6.3472E-06       |
| B2-013 | AR0113 + NO3       | → AR0126                                                                                                                                                                                           | ARR1  | 0.313E-12        |
| B2-014 | AR0113 + HO        | → AR0126                                                                                                                                                                                           | ARR1  | 0.153E-11        |
| B2-015 | AR0126 + NO2       | → AR0138                                                                                                                                                                                           | ARR1  | 0.208E-11        |
| B2-016 | AR0114             | → 0.32 AR0127 + 0.68 BTOL2OH10                                                                                                                                                                     | ARR1  | 1.0E+06          |
| B2-017 | BTOL2OH10          | → 0.350 AU5002 + 0.350 DD2000 +<br>0.140 UD5002 + 0.140 DD2000 +<br>0.250 UD5000 + 0.250 AD2000 +<br>0.095 UD4000 + 0.095 AK3000 +<br>0.090 AU5000 + 0.090 DD2000 +<br>0.075 AU4000 + 0.075 DK3000 | ARR1  | 1.0E+07          |
| B2-018 | AR0115 + HO        | → AR0099                                                                                                                                                                                           | ARR1  | 0.115E-09        |
| B2-019 | AR0115             | → AR0114                                                                                                                                                                                           | PHOTO | 6.3472E-06       |
| B2-020 | AR0101 + NO        | → AR0118                                                                                                                                                                                           | ARR2  | 0.254E-11 -360.  |
| B2-021 | AR0101 + NO3       | → AR0118                                                                                                                                                                                           | ARR1  | 0.250E-11        |
| B2-022 | AR0101 + HO2       | → AR01192                                                                                                                                                                                          | ARR2  | 0.239E-12 -1300. |
| B2-023 | AR0119             | → AR0118                                                                                                                                                                                           | PHOTO | 6.3472E-06       |
| B2-024 | AR0119 + HO        | → AR0101                                                                                                                                                                                           | ARR1  | 0.107E-09        |
| B2-025 | AR0119             | → AR0114                                                                                                                                                                                           | PHOTO | 1.0401E-06       |
| B2-026 | AR0118             | → DD2000 + AU5002                                                                                                                                                                                  | ARR1  | 0.100E+07        |
| B2-027 | AR0127 + HO        | → 0.93 AR0140 + 0.07 Me6Cy1U3K                                                                                                                                                                     | ARR1  | 0.235E-10        |
| B2-028 | AR0140 + HO2       | → AR01400OH                                                                                                                                                                                        | ARR2  | 0.239E-12 -1300. |
| B2-029 | AR0140 + NO        | → AR014010                                                                                                                                                                                         | ARR2  | 0.270E-11 -360.  |
| B2-030 | AR01400OH + HO     | → MBQN1K1OH                                                                                                                                                                                        | ARR1  | 1.42E-10         |
| B2-031 | AR014010           | → C73K1OH2O                                                                                                                                                                                        | ARR1  | 1.00E+6          |
| B2-032 | C73K1OH2O +<br>HO2 | → 0.44 DD5002 + 0.56 C73K1OH0OH                                                                                                                                                                    | ARR2  | 5.20E-13 -980.   |
| B2-033 | C73K1OH0OH +<br>HO | → C73K1OH2O                                                                                                                                                                                        | ARR1  | 9.29E-11         |
| B2-034 | C73K1OH2O + NO     | → DD5002                                                                                                                                                                                           | ARR2  | 7.50E-12 -290.   |
| B2-035 | AR0100 + HO        | → 0.07 AR0116 + 0.065 MBQN1OH +<br>0.73 TOL3OH + 0.135 BTOL3OH2O                                                                                                                                   | ARR1  | 0.205E-09        |
| B2-036 | AR0100 + NO3       | → AR0116                                                                                                                                                                                           | ARR1  | 0.201E-09        |
| B2-037 | AR0100 + O3        | → AR0117                                                                                                                                                                                           | ARR1  | 0.281E-16        |
| B2-038 | AR0116 + NO2       | → AR0128                                                                                                                                                                                           | ARR1  | 0.208E-11        |
| B2-039 | AR0116 + O3        | → AR0129                                                                                                                                                                                           | ARR1  | 0.286E-12        |
| B2-040 | AR0128 + HO        | → AR0142                                                                                                                                                                                           | ARR1  | 0.683E-11        |
| B2-041 | AR0128 + NO3       | → AR0142                                                                                                                                                                                           | ARR1  | 0.503E-11        |
| B2-042 | AR0129 + HO2       | → AR01442                                                                                                                                                                                          | ARR2  | 0.239E-12 -1300. |
| B2-043 | AR0129 + NO        | → AR0116                                                                                                                                                                                           | ARR2  | 0.254E-11 -360.  |
| B2-044 | AR0129 + NO3       | → AR0116                                                                                                                                                                                           | ARR1  | 0.250E-11        |
| B2-045 | AR0144             | → AR0116                                                                                                                                                                                           | PHOTO | 6.3472E-06       |
| B2-046 | AR0144 + HO        | → AR0129                                                                                                                                                                                           | ARR1  | 0.205E-09        |
| B2-047 | AR0142 + NO        | → AR0152                                                                                                                                                                                           | ARR2  | 0.254E-11 -360.  |
| B2-048 | AR0142 + NO3       | → AR0152                                                                                                                                                                                           | ARR1  | 0.250E-11        |
| B2-049 | AR0142 + HO2       | → AR01532                                                                                                                                                                                          | ARR2  | 0.239E-12 -1300. |
| B2-050 | AR0153             | → AR0152                                                                                                                                                                                           | PHOTO | 6.3472E-06       |
| B2-051 | AR0153 + HO        | → AR0142                                                                                                                                                                                           | ARR2  | 0.190E-11 -190.  |
| B2-052 | AR0152             | → AD2000 + AU50DN                                                                                                                                                                                  | ARR1  | 1.00E+6          |
| B2-053 | AU50DN + HO        | → FURR6                                                                                                                                                                                            | ARR2  | 0.190E-11 -190.  |
| B2-054 | FURR6 + HO         | → radFURR6                                                                                                                                                                                         | ARR1  | 0.150E-11        |
| B2-055 | radFURR6 + HO2     | → FURR6OHOH                                                                                                                                                                                        | ARR2  | 0.204E-12 -1300. |
| B2-056 | radFURR6 + NO      | → DK3000                                                                                                                                                                                           | ARR2  | 0.270E-11 -360.  |
| B2-057 | radFURR6 + NO3     | → DK3000                                                                                                                                                                                           | ARR1  | 0.230E-11        |
| B2-058 | FURR6OHOH +<br>HO  | → radFURR6                                                                                                                                                                                         | ARR1  | 1.700E-11        |

|        |                 |                                                                                                                                                                                     |       |                  |
|--------|-----------------|-------------------------------------------------------------------------------------------------------------------------------------------------------------------------------------|-------|------------------|
| B2-059 | TOL3OH + HO     | → 0.07 TOL2OH10 + 0.07 MBQN2OH + 0.73 TOL4OH + 0.13 BTOL4OH2O                                                                                                                       | ARR1  | 2.5E-10          |
| B2-060 | TOL4OH + HO     | → 0.07 TOL3OH10 + 0.07 MBQN3OH + 0.73 TOL5OH + 0.13 BTOL5OH2O                                                                                                                       | ARR1  | 2.5E-10          |
| B2-061 | TOL2OH10 + NO2  | → TOL3OH1NO2                                                                                                                                                                        | ARR1  | 0.208E-11        |
| B2-062 | TOL2OH10 + O3   | → TOL2OH2O                                                                                                                                                                          | ARR1  | 0.286E-12        |
| B2-063 | TOL2OH2O + HO2  | → TOL2OH0OH2                                                                                                                                                                        | ARR2  | 0.239E-12 -1300. |
| B2-064 | TOL2OH2O + NO   | → TOL2OH1O                                                                                                                                                                          | ARR2  | 0.254E-11 -360.  |
| B2-065 | TOL2OH2O + NO3  | → TOL2OH1O                                                                                                                                                                          | ARR1  | 0.250E-11        |
| B2-066 | TOL2OH0OH       | → TOL2OH1O                                                                                                                                                                          | PHOTO | 6.3472E-06       |
| B2-067 | TOL2OH0OH + HO  | → TOL2OH2O                                                                                                                                                                          | ARR1  | 0.205E-09        |
| B2-068 | TOL3OH10 + NO2  | → TOL4OH1NO2                                                                                                                                                                        | ARR1  | 0.208E-11        |
| B2-069 | TOL3OH10 + O3   | → TOL3OH2O                                                                                                                                                                          | ARR1  | 0.286E-12        |
| B2-070 | TOL3OH2O + HO2  | → TOL3OH0OH2                                                                                                                                                                        | ARR2  | 0.239E-12 -1300. |
| B2-071 | TOL3OH2O + NO   | → TOL3OH1O                                                                                                                                                                          | ARR2  | 0.254E-11 -360.  |
| B2-072 | TOL3OH2O + NO3  | → TOL3OH1O                                                                                                                                                                          | ARR1  | 0.250E-11        |
| B2-073 | TOL3OH0OH       | → TOL3OH1O                                                                                                                                                                          | PHOTO | 6.3472E-06       |
| B2-074 | TOL3OH0OH + HO  | → TOL3OH2O                                                                                                                                                                          | ARR1  | 0.205E-09        |
| B2-075 | BTOL3OH2O + HO2 | → 0.65 BTOL3OH10 + 0.35 BTOL3OH0OH                                                                                                                                                  | ARR2  | 0.239E-12 -1300. |
| B2-076 | BTOL3OH2O + NO3 | → BTOL3OH1O                                                                                                                                                                         | ARR1  | 0.250E-11        |
| B2-077 | BTOL3OH2O + NO  | → BTOL3OH1O                                                                                                                                                                         | ARR2  | 0.254E-11 -360.  |
| B2-078 | BTOL3OH1O       | → 0.165 AD5000 + 0.165 DD2000 + 0.165 UD5000 + 0.165 AA2000 + 0.165 AU5000 + 0.165 AD2000 + 0.165 DK5000 + 0.165 DD2000 + 0.165 AD4000 + 0.165 DK3000 + 0.165 AU4000 + 0.165 AK3000 | ARR1  | 1.0E+06          |
| B2-079 | BTOL3OH0OH      | → BTOL3OH1O                                                                                                                                                                         | PHOTO | 6.3472E-06       |
| B2-080 | BTOL3OH0OH + HO | → BTOL3OH2O                                                                                                                                                                         | ARR1  | 0.205E-09        |
| B2-081 | BTOL4OH2O + HO2 | → 0.65 BTOL4OH10 + 0.35 BTOL4OH0OH                                                                                                                                                  | ARR2  | 0.239E-12 -1300. |
| B2-082 | BTOL4OH2O + NO3 | → BTOL4OH1O                                                                                                                                                                         | ARR1  | 0.250E-11        |
| B2-083 | BTOL4OH2O + NO  | → BTOL4OH1O                                                                                                                                                                         | ARR2  | 0.254E-11 -360.  |
| B2-084 | BTOL4OH1O       | → 0.250 AD4001 + 0.250 DK3000 + 0.250 AD5000 + 0.250 AD2000 + 0.250 AU5000 + 0.250 AA2000 + 0.250 AK5000 + 0.250 DD2000                                                             | ARR1  | 1.0E+06          |
| B2-085 | BTOL4OH0OH      | → BTOL4OH1O                                                                                                                                                                         | PHOTO | 6.3472E-06       |
| B2-086 | BTOL4OH0OH + HO | → BTOL4OH2O                                                                                                                                                                         | ARR1  | 0.205E-09        |
| B2-087 | BTOL5OH2O + HO2 | → 0.65 BTOL5OH10 + 0.35 BTOL5OH0OH                                                                                                                                                  | ARR2  | 0.239E-12 -1300. |
| B2-088 | BTOL5OH2O + NO3 | → BTOL5OH1O                                                                                                                                                                         | ARR1  | 0.250E-11        |
| B2-089 | BTOL5OH2O + NO  | → BTOL5OH1O                                                                                                                                                                         | ARR2  | 0.254E-11 -360.  |
| B2-090 | BTOL5OH1O       | → 0.250 AD5000 + 0.250 AA2000 + 0.250 AA4000 + 0.250 DK3000 + 0.250 AD4001 + 0.250 AK3000 + 0.250 AK5000 + 0.250 AD2000                                                             | ARR1  | 1.0E+06          |
| B2-091 | BTOL5OH0OH      | → BTOL5OH1O                                                                                                                                                                         | PHOTO | 6.3472E-06       |
| B2-092 | BTOL5OH0OH + HO | → BTOL5OH2O                                                                                                                                                                         | ARR1  | 0.205E-09        |

---

**BLOC 3 : BICYCLIC COMPOUND PATHWAY**

|        |               |                              |      |                  |
|--------|---------------|------------------------------|------|------------------|
| B3-001 | AR0086 + NO   | → 0.89 AR0092 + 0.11 AR0093  | ARR2 | 2.542E-12 -360.  |
| B3-002 | AR0086 + NO3  | → AR0092                     | ARR1 | 0.250E-11        |
| B3-003 | AR0086 + HO2  | → AR00942                    | ARR2 | 0.239E-12 -1300. |
| B3-004 | AR0086        | → radHOM70                   | ARR2 | 1.297E+03 3920.  |
| B3-005 | radHOM70      | → radHOM90                   | ARR1 | 0.5              |
| B3-006 | radHOM70 + NO | → 0.80 HOM10 + 0.20 HOM10NO2 | ARR2 | 2.7E-12 360.     |

|        |                 |                                                                                                                                                                                  |       |                  |
|--------|-----------------|----------------------------------------------------------------------------------------------------------------------------------------------------------------------------------|-------|------------------|
| B3-007 | radHOM70 + HO2  | → HOM100H                                                                                                                                                                        | ARR2  | 2.6E-13 1300.    |
| B3-008 | radHOM90 + NO   | → 0.80 HOM20 + 0.20 HOM20NO2                                                                                                                                                     | ARR2  | 2.7E-12 360.     |
| B3-009 | radHOM90 + HO2  | → HOM200H                                                                                                                                                                        | ARR2  | 2.6E-13 1300.    |
| B3-010 | AR0092          | → 0.15 UD5001 + 0.15 DD2000 +<br>0.15 UD5000 + 0.15 DD2000 +<br>0.05 MFUR + 0.05 DD2000 +<br>0.20 UD4000 + 0.20 DK3000 +<br>0.30 FURR5 + 0.30 CH2O +<br>0.15 FURR3 + 0.15 D02000 | ARR1  | 1.00E+06         |
| B3-011 | FURR5 + HO      | → FUROH                                                                                                                                                                          | ARR1  | 1.570E-10        |
| B3-012 | AR0094          | → AR0092                                                                                                                                                                         | PHOTO | 6.3472E-06       |
| B3-013 | AR0094 + HO     | → AR0104                                                                                                                                                                         | ARR1  | 0.964E-10        |
| B3-014 | AR0093          | → AR0092                                                                                                                                                                         | PHOTO | 1.0401E-06       |
| B3-015 | AR0093 + HO     | → AR0104                                                                                                                                                                         | ARR1  | 0.716E-10        |
| B3-016 | AR0104          | → DD2000 + 3U5002                                                                                                                                                                | PHOTO | 1.0291E-06       |
| B3-017 | AR0104 + HO     | → DD2000 + 3U5002                                                                                                                                                                | ARR1  | 0.900E-10        |
| B3-018 | MFUR + HO       | → AR0121                                                                                                                                                                         | ARR1  | 0.690E-10        |
| B3-019 | MFUR + NO3      | → AR0121                                                                                                                                                                         | ARR1  | 0.100E-11        |
| B3-020 | MFUR + O3       | → AR0121                                                                                                                                                                         | ARR1  | 0.800E-18        |
| B3-021 | FURON + HO      | → AR0035                                                                                                                                                                         | ARR1  | 0.445E-10        |
| B3-022 | FURON + NO3     | → AR0035                                                                                                                                                                         | ARR1  | 0.300E-12        |
| B3-023 | FURON + O3      | → AR0035                                                                                                                                                                         | ARR1  | 0.220E-18        |
| B3-024 | AR0121 + NO     | → ED5000                                                                                                                                                                         | ARR2  | 0.254E-11 -360.  |
| B3-025 | AR0121 + NO3    | → ED5000                                                                                                                                                                         | ARR1  | 0.250E-11        |
| B3-026 | AR0121 + HO2    | → AR01342                                                                                                                                                                        | ARR2  | 0.205E-12 -1300. |
| B3-027 | AR0134          | → ED5000                                                                                                                                                                         | PHOTO | 6.3472E-06       |
| B3-028 | AR0134 + HO     | → AR0121                                                                                                                                                                         | ARR1  | 0.253E-10        |
| B3-029 | ED5000 + HO     | → radED5000                                                                                                                                                                      | ARR1  | 0.344E-10        |
| B3-030 | radED5000 + NO  | → radED5002                                                                                                                                                                      | ARR2  | 0.750E-11 -290.  |
| B3-031 | radED5000 + HO2 | → 0.56 ED5000OOH + 0.44 radED5002                                                                                                                                                | ARR2  | 5.2E-13 -980.    |
| B3-032 | ED5000OOH + HO  | → radED5000                                                                                                                                                                      | ARR1  | 3.59E-12         |
| B3-033 | radED5002 + NO  | → 3K2000 + CH2O                                                                                                                                                                  | ARR2  | 0.270E-11 -360.  |
| B3-034 | radED5002 + HO2 | → ED5002OOH2                                                                                                                                                                     | ARR2  | 0.182E-12 -1300. |
| B3-035 | ED5002OOH + HO  | → radED5002                                                                                                                                                                      | ARR1  | 3.59E-12         |
| B3-036 | AR0035 + NO     | → ED4001                                                                                                                                                                         | ARR2  | 0.254E-11 -360.  |
| B3-037 | AR0035 + NO3    | → ED4001                                                                                                                                                                         | ARR1  | 0.250E-11        |
| B3-038 | AR0035 + HO2    | → AR0048                                                                                                                                                                         | ARR2  | 0.205E-12 -1300. |
| B3-039 | AR0048          | → ED4001                                                                                                                                                                         | PHOTO | 6.3472E-06       |
| B3-040 | AR0048 + HO     | → AR0035                                                                                                                                                                         | ARR1  | 0.368E-10        |
| B3-041 | ED4001 + HO     | → radED4001                                                                                                                                                                      | ARR1  | 0.344E-10        |
| B3-042 | radED4001 + NO  | → CH2O                                                                                                                                                                           | ARR2  | 0.270E-11 -360.  |
| B3-043 | radED4001 + HO2 | → HD2000                                                                                                                                                                         | ARR2  | 1.126E-13 -1300. |
| B3-044 | HD2000 + HO     | → DD2000                                                                                                                                                                         | ARR1  | 2.91E-11         |

---

**BLOC 4 : RING OPENING PATHWAY (EPOX)**

|        |              |                              |       |                                 |
|--------|--------------|------------------------------|-------|---------------------------------|
| B4-001 | AR0087       | → AR0010 + 3K2000            | PHOTO | 7.565E-04                       |
| B4-002 | AR0087       | → 2U6000                     | PHOTO | 7.565E-04                       |
| B4-003 | AR0087 + NO3 | → AR0095                     | ARR2  | 0.396E-11 1862.                 |
| B4-004 | AR0087 + HO  | → 0.69 AR0096 + 0.31 AR0095  | ARR1  | 0.800E-10                       |
| B4-005 | AR0087 + O3  | → AR0010 + AR0097            | ARR1  | 0.500E-17                       |
| B4-006 | AR0095 + NO  | → 2U6000                     | ARR2  | 0.810E-11 -270.                 |
| B4-007 | AR0095 + NO2 | → AR0105                     | TROE5 | 0.270E-27 7.1 0.120E-10 0.9 0.3 |
| B4-008 | AR0095 + NO3 | → 2U6000                     | ARR1  | 0.400E-11                       |
| B4-009 | AR0095 + HO2 | → 0.71 AR0106 + 0.29 AR01072 | ARR2  | 0.430E-12 -1040.                |

|        |              |                                        |       |                                               |
|--------|--------------|----------------------------------------|-------|-----------------------------------------------|
| B4-010 | AR0105       | → AR0095                               | TROE7 | 0.490E-02 12100. 0.0 0.540E+17 13830. 0.0 0.3 |
| B4-011 | AR0105 + HO  | → UD5000                               | ARR1  | 0.596E-10                                     |
| B4-012 | AR0106       | → 2U6000                               | PHOTO | 6.3472E-06                                    |
| B4-013 | AR0106       | → 2U6000                               | PHOTO | 1.0557E-05                                    |
| B4-014 | AR0106       | → 2U6000                               | PHOTO | 1.0556E-05                                    |
| B4-015 | AR0106 + HO  | → AR0095                               | ARR1  | 0.629E-10                                     |
| B4-016 | AR0107       | → 2U6000                               | PHOTO | 1.0557E-05                                    |
| B4-017 | AR0107       | → 2U6000                               | PHOTO | 1.0556E-05                                    |
| B4-018 | AR0107 + HO  | → 2U6000                               | ARR1  | 0.598E-10                                     |
| B4-019 | AR0096 + NO  | → 0.89 AR0108 + 0.11 AR0109            | ARR2  | 2.537E-12 -360.                               |
| B4-020 | AR0096 + NO3 | → AR0108                               | ARR1  | 0.250E-11                                     |
| B4-021 | AR0096 + HO2 | → AR01102                              | ARR2  | 0.239E-12 -1300.                              |
| B4-022 | AR0108       | → 0.5 DK4000 + 0.5 DK3000 + 0.5 AR0010 | ARR1  | 1.000E+06                                     |
| B4-023 | AR0109 + HO  | → AR0124                               | ARR1  | 0.306E-10                                     |
| B4-024 | AR0109       | → AR0010 + 3K2000                      | PHOTO | 2.2690E-05                                    |
| B4-025 | AR0109       | → AR0010                               | PHOTO | 1.0291E-06                                    |
| B4-026 | AR0110       | → AR0108                               | PHOTO | 6.3472E-06                                    |
| B4-027 | AR0110       | → AR0108                               | PHOTO | 2.2690E-05                                    |
| B4-028 | AR0110       | → AR0108                               | PHOTO | 1.0291E-06                                    |
| B4-029 | AR0110 + HO  | → AR0124                               | ARR1  | 0.704E-10                                     |
| B4-030 | AR0010 + HO  | → AR0020                               | ARR1  | 0.432E-10                                     |
| B4-031 | AR0010 + NO3 | → AR0020                               | ARR2  | 0.115E-10 1862.                               |
| B4-032 | AR0124       | → AR0010 + 3K2000                      | PHOTO | 2.2690E-05                                    |
| B4-033 | AR0124       | → AR0010 + 3K2000                      | PHOTO | 3.3377E-04                                    |
| B4-034 | AR0124 + HO  | → AR0010 + 3K2000                      | ARR1  | 0.406E-10                                     |
| B4-035 | AR0020 + NO2 | → AR0038                               | TROE5 | 0.270E-27 7.1 0.120E-10 0.9 0.3               |
| B4-036 | AR0020 + HO2 | → 0.71 AR0039 + 0.29 AR00402           | ARR2  | 0.430E-12 -1040.                              |
| B4-037 | AR0038       | → AR0020                               | TROE7 | 0.490E-02 12100. 0.0 0.540E+17 13830. 0.0 0.3 |
| B4-038 | AR0038 + HO  | → DD3001                               | ARR1  | 0.229E-10                                     |
| B4-039 | AR0039 + HO  | → AR0020                               | ARR1  | 0.262E-10                                     |
| B4-040 | AR0097       | → 0.18 AR0111 + .125 D02000 + 3K2000   | ARR1  | 1.000E+06                                     |
| B4-041 | AR0111 + SO2 | → SULF + DK3000                        | ARR1  | 0.700E-13                                     |
| B4-042 | AR0111 + CO  | → DK3000                               | ARR1  | 0.120E-14                                     |
| B4-043 | AR0111 + NO  | → DK3000                               | ARR1  | 0.100E-13                                     |
| B4-044 | AR0111 + NO2 | → DK3000                               | ARR1  | 0.100E-14                                     |
| B4-045 | AR0111       | → .375 DK3000 + .625 AK3000            | ARR1  | 1.600E-17                                     |

---

**BLOC 5 : RING OPENING PATHWAY (ALCENE)**

|        |              |                                                                                                                         |       |                     |
|--------|--------------|-------------------------------------------------------------------------------------------------------------------------|-------|---------------------|
| B5-001 | UU7000 + HO  | → 0.32 3U7000 + 0.68 2U7000                                                                                             | ARR1  | 0.644E-10           |
| B5-002 | UU7000 + NO3 | → 0.08 3U7000 + 0.92 2U7000                                                                                             | ARR1  | 2.0E-13             |
| B5-003 | UU7000       | → 0.5 1U6000 + 0.5 3U7000                                                                                               | PHOTO | 5.1086E-05          |
| B5-004 | 2U7000 + NO  | → 1U7000                                                                                                                | ARR2  | 0.270E-11 -360.     |
| B5-005 | 2U7000 + NO3 | → 1U7000                                                                                                                | ARR1  | 0.230E-11           |
| B5-006 | 1U7000       | → 0.125 UD7000 + 0.500 UD6000 + 0.125 UD4000 + 0.125 DK3000 + 0.125 UD5000 + 0.125 DD2000 + 0.125 UD5001 + 0.125 A02000 | ARR3  | 0.112E+10 1.7 2851. |
| B5-007 | 3U7000 + NO  | → 1U6000                                                                                                                | ARR2  | 0.810E-11 -270.     |
| B5-008 | 3U7000 + NO3 | → 1U6000                                                                                                                | ARR1  | 0.500E-11           |
| B5-009 | UD7000 + HO  | → 2D7000                                                                                                                | ARR1  | 0.426E-10           |
| B5-010 | AU7000 + HO  | → 2D7000                                                                                                                | ARR1  | 8.73E-11            |
| B5-011 | 2D7000 + NO  | → 1D7000                                                                                                                | ARR2  | 0.270E-11 -360.     |
| B5-012 | 2D7000 + HO2 | → AU70002                                                                                                               | ARR2  | 0.281E-12 -1250.    |

|        |              |                                                                                                                          |      |                     |
|--------|--------------|--------------------------------------------------------------------------------------------------------------------------|------|---------------------|
| B5-013 | 2D7000 + NO3 | → 1D7000                                                                                                                 | ARR1 | 0.230E-11           |
| B5-014 | 1D7000       | → 0.05 AU5002 + 0.05 AD2000 +<br>0.35 AU4000 + 0.35 AK3000 +<br>0.35 DK4000 + 0.35 DK3000 +<br>0.25 DD3000 + 0.25 DK4001 | ARR3 | 0.112E+10 1.7 2851. |
| B5-015 | AU6000 + HO  | → 2D6000                                                                                                                 | ARR1 | 2.89E-11            |
| B5-016 | UD6000 + HO  | → 2D6001                                                                                                                 | ARR1 | 1.09E-10            |
| B5-017 | 2D6000 + NO  | → 1D6000                                                                                                                 | ARR2 | 2.703E-11 -360.     |
| B5-018 | 2D6000 + HO2 | → DK4000 + AD20002                                                                                                       | ARR2 | 0.264E-12 -1250.    |
| B5-019 | 2D6000 + NO3 | → 1D6000                                                                                                                 | ARR1 | 0.230E-11           |
| B5-020 | 2D6001 + NO  | → 1D6001                                                                                                                 | ARR2 | 2.703E-11 -360.     |
| B5-021 | 2D6001 + HO2 | → AU60002                                                                                                                | ARR2 | 0.264E-12 -1250.    |
| B5-022 | 2D6001 + NO3 | → 1D6001                                                                                                                 | ARR1 | 0.230E-11           |
| B5-023 | 1D6000       | → AD2000 + DK4000                                                                                                        | ARR3 | 0.112E+10 1.7 2451. |
| B5-024 | 1D6001       | → DK3000 + DD3000                                                                                                        | ARR3 | 0.112E+10 1.7 2451. |

---

**BLOC 6 : OTHER MAJOR GAS COMPOUND FORMATION PATHWAY**

|        |               |                                                            |       |                     |
|--------|---------------|------------------------------------------------------------|-------|---------------------|
| B6-001 | UD4000 + HO   | → .144 2D4000                                              | ARR1  | 5.207E-11           |
| B6-002 | UD4000 + O3   | → DD2000                                                   | ARR1  | 1.600E-18           |
| B6-003 | UD4000        | → FURON                                                    | PHOTO | 8.7754E-04          |
| B6-004 | UD4000        | → MALAHY                                                   | PHOTO | 8.7754E-04          |
| B6-005 | 2U6000 + NO   | → 0.90 1U6000                                              | ARR2  | 2.703E-11 -360.     |
| B6-006 | 2U6000 + NO3  | → 1U6000                                                   | ARR1  | 0.230E-11           |
| B6-007 | 2U6000 + MO2  | → 0.34 1U6000 + 0.33 UD6000                                | ARR2  | 0.565E-13 -845.     |
| B6-008 | 2U6000 + ACO3 | → 0.65 1U6000                                              | ARR1  | 0.100E-10           |
| B6-009 | 1U6000        | → UD5000                                                   | ARR3  | 0.112E+10 1.7 2451. |
| B6-010 | UD6000        | → UD5000                                                   | PHOTO | 2.7986E-06          |
| B6-011 | UD5000 + HO   | → 0.54 3U5002 + 0.23 FURR6 +<br>0.23 2D5003                | ARR1  | 0.558E-10           |
| B6-012 | UD5000 + O3   | → 0.50 DD2000 + 0.50 DK3000 +<br>3K2000                    | ARR1  | 0.480E-17           |
| B6-013 | UD5000 + NO3  | → 3U5002                                                   | ARR1  | 0.107E-13           |
| B6-014 | UD5000        | → MFUR                                                     | PHOTO | 1.1953E-03          |
| B6-015 | UD5000        | → MALAHY                                                   | PHOTO | 1.1953E-03          |
| B6-016 | UD5001 + HO   | → 0.40 3U5000 + 0.40 3U5001 +<br>0.10 2D5000 + 0.10 2D5001 | ARR1  | 5.168E-11           |
| B6-017 | UD5001 + O3   | → 0.30 DK3000 + 0.70 DD2000 +<br>3K2000                    | ARR1  | 1.600E-18           |
| B6-018 | UD5001 + NO3  | → 0.50 3U5000 + 0.50 3U5001                                | ARR1  | 0.222E-13           |
| B6-019 | UD5001        | → FURON                                                    | PHOTO | 8.7754E-04          |
| B6-020 | UD5001        | → MALAHY                                                   | PHOTO | 8.7754E-04          |
| B6-021 | MALAHY + HO   | → AR0080                                                   | ARR1  | 0.150E-11           |
| B6-022 | 3U5001 + NO   | → 1D4001                                                   | ARR2  | 0.810E-11 -270.     |
| B6-023 | 3U5001 + NO2  | → PU5001                                                   | ARR3  | 0.330E-08 -1.0 0.   |
| B6-024 | 3U5001 + NO3  | → 1D4001                                                   | ARR1  | 0.500E-11           |
| B6-025 | 3U5001 + MO2  | → 0.68 1D4001 + 0.31 AU5002                                | ARR1  | 0.100E-10           |
| B6-026 | 3U5001 + ACO3 | → 1D4001                                                   | ARR2  | 0.500E-11 -500.     |
| B6-027 | 1D4001        | → DK3000                                                   | ARR3  | 0.224E+10 1.7 2567. |
| B6-028 | 2D5001 + NO   | → .967 1D5001                                              | ARR2  | 0.270E-11 -360.     |
| B6-029 | 2D5001 + HO2  | → HD50012                                                  | ARR2  | 0.242E-12 -1250.    |
| B6-030 | 2D5001 + NO3  | → 1D5001                                                   | ARR1  | 0.230E-11           |
| B6-031 | 1D5001        | → DK3000 + DD2000                                          | ARR3  | 0.112E+10 1.7 1890. |
| B6-032 | 2D5000 + NO   | → .967 1D5000                                              | ARR2  | 0.270E-11 -360.     |
| B6-033 | 2D5000 + HO2  | → HD5000                                                   | ARR2  | 0.242E-12 -1250.    |
| B6-034 | 2D5000 + NO3  | → 1D5000                                                   | ARR1  | 0.230E-11           |
| B6-035 | 2D5000 + MO2  | → 0.69 1D5000                                              | ARR2  | 0.338E-12 415.      |

|        |               |                        |       |                                               |
|--------|---------------|------------------------|-------|-----------------------------------------------|
| B6-036 | 2D5000 + AC03 | → 1D5000               | ARR1  | 0.100E-10                                     |
| B6-037 | 1D5000        | → DK3000 + DD2000      | ARR3  | 0.112E+10 1.7 1734.                           |
| B6-038 | DK3000        | → 3K2000               | PHOTO | 9.5613E-05                                    |
| B6-039 | DK3000 + NO3  | → 3K2000               | ARR2  | 3.76E-12 1900.0                               |
| B6-040 | DK3000 + HO   | → 3K2000               | ARR2  | 9.26E-13 -830.                                |
| B6-041 | PU5001        | → 3U5001               | ARR2  | 0.200E+16 12800.                              |
| B6-042 | PU5001 + O3   | → 0.30 DK3000 + 3K2000 | ARR1  | 0.480E-17                                     |
| B6-043 | PU5001        | → 3U5001               | PHOTO | 5.9784E-07                                    |
| B6-044 | 3K2000 + NO2  | → P02000               | TROE5 | 0.850E-28 6.5 0.110E-10 1.0 0.6               |
| B6-045 | P02000        | → 3K2000               | TROE7 | 0.190E-02 12175. 0.0 0.280E+17 13580. 0.0 0.6 |
| B6-046 | P02000        | → 3K2000               | PHOTO | 5.9784E-07                                    |
| B6-047 | 1D4000        | → 3K2000 + DD2000      | ARR3  | 0.112E+10 1.7 2768.                           |
| B6-048 | 2D5003 + NO   | → 1D5003               | ARR2  | 0.261E-11 -360.                               |
| B6-049 | 2D5003 + NO3  | → 1D5003               | ARR1  | 0.230E-11                                     |
| B6-050 | 1D5003        | → 3K2000               | ARR3  | 0.112E+10 1.7 2158.                           |
| B6-051 | 1D5003        | → DK3000 + DD2000      | ARR3  | 0.112E+10 1.7 3197.                           |

---

**BLOC 7 : OTHER SOA MAJOR CONTRIBUTORS FORMATION PATHWAY**

|        |              |                              |              |                     |
|--------|--------------|------------------------------|--------------|---------------------|
| B7-001 | 3U5002 + NO2 | → PU5002                     | ARR3         | 0.330E-08 -1.0 0.   |
| B7-002 | 3U5002 + HO2 | → 0.80 GU5002 + 0.20 AU50022 | ARR2         | 0.640E-12 -925.     |
| B7-003 | 3U5002 + NO  | → 1D4000                     | ARR2         | 0.810E-11 -270.     |
| B7-004 | 3U5002 + NO3 | → 1D4000                     | ARR1         | 0.500E-11           |
| B7-005 | PU5002       | → 3U5002                     | ARR2         | 0.200E+16 12800.    |
| B7-006 | PU5002 + HO  | → 0.5 2P5006                 | ARR1         | 1.364E-11           |
| B7-007 | PU5002 + O3  | → 0.50 DK3000 + 0.50 3K2000  | ARR1         | 0.360E-17           |
| B7-008 | PU5002       | → 3K2000                     | PHOTO        | 1.0009E-06          |
| B7-009 | PU5002       | → 3U5002                     | PHOTO        | 5.9784E-07          |
| B7-010 | 2P5006 + HO2 | → PH50022                    | ARR2         | 0.242E-12 -1250.    |
| B7-011 | 2P5006 + NO  | → .967 1P5006                | ARR2         | 0.270E-11 -360.     |
| B7-012 | 2P5006 + NO3 | → 1P5006                     | ARR1         | 0.230E-11           |
| B7-013 | PH5002       | → 3H5004                     | ARR2         | 0.200E+16 12800.    |
| B7-014 | PH5002 + HO  | → .926 PK5001                | ARR1         | 7.439E-11           |
| B7-015 | PH5002       | → 3H5004                     | PHOTO        | 5.9784E-07          |
| B7-016 | PH5002       | → 3K2000                     | PHOTO        | 2.0118E-06          |
| B7-017 | PH5002       | → 1P5006                     | PHOTO        | 6.3472E-06          |
| B7-018 | 1P5006       | → 2P500A                     | ARR2         | 0.120E+12 3936.     |
| B7-019 | 1P5006       | → PK5001                     | ARR2(O2<br>) | 0.250E-13 300.      |
| B7-020 | 1P5006       | → DK3000                     | ARR3         | 0.112E+10 1.7 5234. |
| B7-021 | PK5001       | → 3K2000                     | PHOTO        | 2.0118E-06          |
| B7-022 | 2P500A + HO2 | → PH50042                    | ARR2         | 0.242E-12 -1250.    |
| B7-023 | 2P500A + NO  | → .967 1P500A                | ARR2         | 0.270E-11 -360.     |
| B7-024 | 2P500A + NO3 | → 1P500A                     | ARR1         | 0.230E-11           |
| B7-025 | 3H5004 + NO2 | → PH5002                     | ARR3         | 0.330E-08 -1.0 0.   |
| B7-026 | 3H5004 + HO2 | → 0.80 GH50022               | ARR2         | 0.640E-12 -925.     |
| B7-027 | 3H5004 + NO  | → DK4000                     | ARR2         | 0.810E-11 -270.     |
| B7-028 | 3H5004 + NO3 | → DK4000                     | ARR1         | 0.500E-11           |
| B7-029 | 3H5009 + NO2 | → PH5004                     | ARR3         | 0.330E-08 -1.0 0.   |
| B7-030 | PH5004       | → 3H5009                     | ARR2         | 0.200E+16 12800.    |
| B7-031 | PH5004 + HO  | → .266 PD5002                | ARR1         | 3.708E-11           |
| B7-032 | PH5004 + HO  | → 2P500A                     | ARR2         | 0.191E-11 -190.     |
| B7-033 | PH5004       | → 3H5009                     | PHOTO        | 5.9784E-07          |
| B7-034 | PH5004       | → 1P500A                     | PHOTO        | 6.3472E-06          |



|        |              |   |                         |       |                     |
|--------|--------------|---|-------------------------|-------|---------------------|
| B7-035 | 3U5000 + NO2 | → | PU5000                  | ARR3  | 0.330E-08 -1.0 0.   |
| B7-036 | 3U5000 + NO  | → | 1D4000                  | ARR2  | 0.810E-11 -270.     |
| B7-037 | 3U5000 + NO3 | → | 1D4000                  | ARR1  | 0.500E-11           |
| B7-038 | PU5000 + HO  | → | 0.13 2P5000             | ARR1  | 0.283E-11           |
| B7-039 | PU5000       | → | 3U5000                  | ARR2  | 0.200E+16 12800.    |
| B7-040 | PU5000 + O3  | → | 0.70 DD2000             | ARR1  | 0.480E-17           |
| B7-041 | PU5000       | → | 3U5000                  | PHOTO | 5.9784E-07          |
| B7-042 | 2P5000 + HO2 | → | PH50002                 | ARR2  | 0.242E-12 -1250.    |
| B7-043 | 3H5000 + NO2 | → | PH5000                  | ARR3  | 0.330E-08 -1.0 0.   |
| B7-044 | 3H5000 + NO  | → | DK4000                  | ARR2  | 0.810E-11 -270.     |
| B7-045 | 3H5000 + NO3 | → | DK4000                  | ARR1  | 0.500E-11           |
| B7-046 | PH5000       | → | 3H5000                  | ARR2  | 0.200E+16 12800.    |
| B7-047 | PH5000 + HO  | → | 2P5000                  | ARR2  | 0.192E-11 -190.     |
| B7-048 | PH5000       | → | 3H5000                  | PHOTO | 5.9784E-07          |
| B7-049 | GU5002 + HO  | → | 0.39 2G5006             | ARR1  | 1.744E-11           |
| B7-050 | GU5002 + O3  | → | 0.5 DK3000 + 0.5 3K2000 | ARR1  | 0.360E-17           |
| B7-051 | GU5002       | → | 3K2000                  | PHOTO | 1.0009E-06          |
| B7-052 | GU5002       | → | 1D4000                  | PHOTO | 6.3472E-06          |
| B7-053 | 2G5006 + HO2 | → | GH50022                 | ARR2  | 0.242E-12 -1250.    |
| B7-054 | GH5002       | → | 3K2000                  | PHOTO | 2.0118E-06          |
| B7-055 | GH5002       | → | DK4000                  | PHOTO | 6.3472E-06          |
| B7-056 | AU5002 + O3  | → | 0.5 DK3000 + 0.5 3K2000 | ARR1  | 0.360E-17           |
| B7-057 | 1P500A       | → | 3P4000 +CH2O            | ARR3  | 0.112E+10 1.7 3065. |
| B7-058 | 1P500A       | → | PK5003                  | ARR2  | 0.400E+11 1661.     |
| B7-059 | PK5003       | → | 3K5003                  | ARR2  | 0.200E+16 12800.    |
| B7-060 | 3K5003 + NO2 | → | PK5003                  | ARR3  | 0.330E-08 -1.00.    |
| B7-061 | PD5002 + HO  | → | 0.43 3P4000             | ARR1  | 0.481E-10           |
| B7-062 | PD5002 + NO3 | → | 0.64 3P4000             | ARR1  | 1.005E-14           |
| B7-063 | PD5002       | → | 3P4000                  | PHOTO | 8.1954E-05          |
| B7-064 | 3P4000 + NO2 | → | PP4000                  | ARR3  | 0.330E-08 -1.0 0.   |
| B7-065 | PP4000       | → | 3P4000                  | ARR2  | 0.400E+16 12800.    |
| B7-066 | PP4000 + HO  | → | PP4004                  | ARR1  | 0.273E-10           |
| B7-067 | PP4000       | → | 3P4000                  | PHOTO | 1.20E-06            |
| B7-068 | PP4004       | → | 3P400X                  | ARR2  | 0.400E+16 12800.    |
| B7-069 | 3P400X + NO2 | → | PP4004                  | ARR3  | 0.330E-08 -1.0 0.   |
| B7-070 | PP4004       | → | 3P400X                  | PHOTO | 5.9784E-07          |

---

**BLOC 8 : LOSS REACTIONS**

|        |                  |   |  |       |           |
|--------|------------------|---|--|-------|-----------|
| B8-001 | NTOL + HO        | → |  | ARR1  | 1.0E-12   |
| B8-002 | AR0027           | → |  | PHOTO | 1.23E-4   |
| B8-003 | BZALDOH + HO     | → |  | ARR1  | 2.03E-11  |
| B8-004 | AR0113           | → |  | PHOTO | 5.0E-04   |
| B8-005 | AR0126 + O3      | → |  | ARR1  | 0.286E-12 |
| B8-006 | AR0138 + HO      | → |  | ARR1  | 5.10E-14  |
| B8-007 | AR0138 + NO3     | → |  | ARR1  | 7.83E-15  |
| B8-008 | Me6Cy1U3K + HO   | → |  | ARR1  | 4.78E-11  |
| B8-009 | AR0128           | → |  | PHOTO | 5.0E-04   |
| B8-010 | TOL3OH1NO2 + HO  | → |  | ARR1  | 0.683E-11 |
| B8-011 | TOL3OH1NO2 + NO3 | → |  | ARR1  | 0.503E-11 |
| B8-012 | TOL4OH1NO2 + HO  | → |  | ARR1  | 0.683E-11 |
| B8-013 | TOL4OH1NO2 + NO3 | → |  | ARR1  | 0.503E-11 |

|        |                |   |       |                  |
|--------|----------------|---|-------|------------------|
| B8-014 | MBQN10H + HO   | → | ARR1  | 0.235E-10        |
| B8-015 | MBQN20H + HO   | → | ARR1  | 0.235E-10        |
| B8-016 | MBQN30H + HO   | → | ARR1  | 0.235E-10        |
| B8-017 | MBQN10H + NO3  | → | ARR1  | 0.100E-11        |
| B8-018 | MBQN20H + NO3  | → | ARR1  | 0.100E-11        |
| B8-019 | MBQN30H + NO3  | → | ARR1  | 0.100E-11        |
| B8-020 | TOL50H + HO    | → | ARR1  | 2.5E-10          |
| B8-021 | AU5000 + HO    | → | ARR1  | 4.51E-11         |
| B8-022 | AU5000 + O3    | → | ARR1  | 4.80E-18         |
| B8-023 | AU5000 + NO3   | → | ARR1  | 1.91E-14         |
| B8-024 | UD5002 + HO    | → | ARR1  | 4.51E-11         |
| B8-025 | UD5002 + O3    | → | ARR1  | 4.80E-18         |
| B8-026 | UD5002 + NO3   | → | ARR1  | 1.91E-14         |
| B8-027 | DD5002 + HO    | → | ARR1  | 1.84E-11         |
| B8-028 | AD5000 + HO    | → | ARR1  | 3.82E-11         |
| B8-029 | AD5000 + O3    | → | ARR1  | 3.60E-18         |
| B8-030 | AD5000 + NO3   | → | ARR1  | 8.35E-12         |
| B8-031 | DK5000 + HO    | → | ARR1  | 3.82E-11         |
| B8-032 | DK5000 + O3    | → | ARR1  | 3.60E-18         |
| B8-033 | DK5000 + NO3   | → | ARR1  | 8.35E-12         |
| B8-034 | MBQN1K10H + HO | → | ARR1  | 6.33E-11         |
| B8-035 | HOM10 + HO     | → | ARR1  | 1.68E-10         |
| B8-036 | HOM20 + HO     | → | ARR1  | 2.16E-10         |
| B8-037 | HOM100H + HO   | → | ARR1  | 2.50E-10         |
| B8-038 | HOM200H + HO   | → | ARR1  | 3.00E-10         |
| B8-039 | HOM10NO2 + HO  | → | ARR1  | 1.72E-10         |
| B8-040 | HOM20NO2 + HO  | → | ARR1  | 1.76E-10         |
| B8-041 | FURR5 + NO3    | → | ARR1  | 4.500E-12        |
| B8-042 | FURR5 + O3     | → | ARR1  | 7.000E-15        |
| B8-043 | FURR3 + HO     | → | ARR1  | 1.330E-10        |
| B8-044 | FURR3 + NO3    | → | ARR1  | 4.800E-12        |
| B8-045 | FURR3 + O3     | → | ARR1  | 7.000E-15        |
| B8-046 | FUROH + HO     | → | ARR1  | 1.570E-10        |
| B8-047 | FUROH + NO3    | → | ARR1  | 4.500E-12        |
| B8-048 | FUROH + O3     | → | ARR1  | 7.000E-15        |
| B8-049 | AR0104 + O3    | → | ARR1  | 3.23E-17         |
| B8-050 | AR0104 + NO3   | → | ARR1  | 4.27E-14         |
| B8-051 | AR0010         | → | PHOTO | 2.2690E-05       |
| B8-052 | AR0020 + NO    | → | ARR2  | 0.810E-11 -270.  |
| B8-053 | AR0020 + NO3   | → | ARR1  | 0.400E-11        |
| B8-054 | AR0039         | → | PHOTO | 6.3472E-06       |
| B8-055 | AR0039         | → | PHOTO | 2.2690E-05       |
| B8-056 | 2U7000 + HO2   | → | ARR2  | 0.281E-12 -1250. |
| B8-057 | 3U7000 + HO2   | → | ARR2  | 0.640E-12 -925.  |
| B8-058 | AU5002 + HO    | → | ARR1  | 2.19E-11         |
| B8-059 | AU4000 + HO    | → | ARR1  | 3.28E-11         |
| B8-060 | A02000 + HO    | → | ARR2  | 4.00E-14 -850.   |
| B8-061 | AK3000 + HO    | → | ARR2  | 4.90E-14 -276.   |
| B8-062 | DK4000 + HO    | → | ARR1  | 2.60E-11         |
| B8-063 | DD3000 + HO    | → | ARR1  | 3.10E-11         |
| B8-064 | DK4001 + HO    | → | ARR1  | 1.30E-11         |

|        |              |   |       |                  |
|--------|--------------|---|-------|------------------|
| B8-065 | AD2000 + HO  | → | ARR1  | 1.34E-11         |
| B8-066 | UD4000 + NO3 | → | ARR1  | 0.149E-13        |
| B8-067 | 2U6000 + HO2 | → | ARR2  | 0.264E-12 -1250. |
| B8-068 | HD5000 + HO  | → | ARR1  | 0.510E-10        |
| B8-069 | HD5000 + NO3 | → | ARR1  | 0.579E-12        |
| B8-070 | HD5001 + HO  | → | ARR1  | 1.111E-10        |
| B8-071 | HD5001 + NO3 | → | ARR1  | 0.683E-13        |
| B8-072 | CH2O         | → | PHOTO | 6.10E-05         |
| B8-073 | CH2O + HO    | → | ARR2  | 0.860E-11 -20.   |
| B8-074 | CH2O + NO3   | → | ARR1  | 0.580E-15        |
| B8-075 | PU5002 + NO3 | → | ARR1  | 0.680E-14        |
| B8-076 | PU5002       | → | PHOTO | 1.0009E-05       |
| B8-077 | PK5001       | → | ARR2  | 0.200E+16 12800. |
| B8-078 | PK5001 + HO  | → | ARR1  | 0.342E-11        |
| B8-079 | PK5001       | → | PHOTO | 8.1954E-05       |
| B8-080 | 3H5009 + HO2 | → | ARR2  | 0.640E-12 -925.  |
| B8-081 | 3H5009 + NO  | → | ARR2  | 0.810E-11 -270.  |
| B8-082 | 3H5009 + NO3 | → | ARR1  | 0.500E-11        |
| B8-083 | PH5004       | → | PHOTO | 2.0118E-06       |
| B8-084 | 3U5000 + HO2 | → | ARR2  | 0.640E-12 -925.  |
| B8-085 | PU5000 + NO3 | → | ARR1  | 0.941E-13        |
| B8-086 | PU5000       | → | PHOTO | 1.9E-05          |
| B8-087 | 2P5000 + NO  | → | ARR2  | 0.270E-11 -360.  |
| B8-088 | 2P5000 + NO3 | → | ARR1  | 0.230E-11        |
| B8-089 | 3H5000 + HO2 | → | ARR2  | 0.640E-12 -925.  |
| B8-090 | PH5000 + HO  | → | ARR1  | 2.626E-11        |
| B8-091 | PH5000 + NO3 | → | ARR1  | 0.558E-12        |
| B8-092 | PH5000       | → | PHOTO | 9.14E-06         |
| B8-093 | GU5002 + NO3 | → | ARR1  | 0.680E-14        |
| B8-094 | GU5002       | → | PHOTO | 1.0009E-05       |
| B8-095 | 2G5006 + NO  | → | ARR2  | 0.270E-11 -360.  |
| B8-096 | 2G5006 + NO3 | → | ARR1  | 0.230E-11        |
| B8-097 | GH5002 + HO  | → | ARR1  | 7.795E-11        |
| B8-098 | GH5002       | → | PHOTO | 6.3472E-06       |
| B8-099 | AU5002 + NO3 | → | ARR1  | 0.680E-14        |
| B8-100 | PK5003 + HO  | → | ARR1  | 0.550E-11        |
| B8-101 | PK5003       | → | PHOTO | 8.40E-05         |
| B8-102 | 3K5003 + HO2 | → | ARR2  | 0.640E-12 -925.  |
| B8-103 | 3K5003 + NO  | → | ARR2  | 0.810E-11 -270.  |
| B8-104 | 3K5003 + NO3 | → | ARR1  | 0.500E-11        |
| B8-105 | PD5002       | → | ARR2  | 0.200E+16 12800. |
| B8-106 | PD5002       | → | PHOTO | 9.70E-06         |
| B8-107 | 3P4000 + HO2 | → | ARR2  | 0.640E-12 -925.  |
| B8-108 | 3P4000 + NO  | → | ARR2  | 0.810E-11 -270.  |
| B8-109 | 3P4000 + NO3 | → | ARR1  | 0.500E-11        |
| B8-110 | PP4004 + HO  | → | ARR1  | 0.331E-11        |
| B8-111 | PP4004       | → | PHOTO | 8.1954E-05       |
| B8-112 | DD2000       | → | PHOTO | 8.0674E-05       |
| B8-113 | DD2000       | → | PHOTO | 4.1198E-06       |
| B8-114 | DD2000       | → | PHOTO | 7.6161E-06       |
| B8-115 | DD2000 + NO3 | → | ARR2  | 2.90E-12 1900.0  |

|        |              |   |       |                  |
|--------|--------------|---|-------|------------------|
| B8-116 | DD2000 + HO  | → | ARR1  | 1.10E-11         |
| B8-117 | PU5001 + HO  | → | ARR1  | 0.283E-10        |
| B8-118 | PU5001 + NO3 | → | ARR1  | 0.941E-13        |
| B8-119 | PU5001       | → | PHOTO | 6.4685E-06       |
| B8-120 | PU5001       | → | PHOTO | 6.2783E-06       |
| B8-121 | PU5001       | → | PHOTO | 6.2783E-06       |
| B8-122 | 3K2000 + HO2 | → | ARR2  | 0.640E-12 -925.  |
| B8-123 | 3K2000 + NO  | → | ARR2  | 0.810E-11 -270.  |
| B8-124 | 3K2000 + NO3 | → | ARR1  | 0.500E-11        |
| B8-125 | P02000 + HO  | → | ARR1  | 0.102E-12        |
| B8-126 | 2D5003 + HO2 | → | ARR2  | 0.242E-12 -1250. |
| B8-127 | AA2000 + HO  | → | ARR2  | 5.740E-14 -880.  |
| B8-128 | AD4000 + HO  | → | ARR1  | 2.58E-11         |
| B8-129 | AD4000 + NO3 | → | ARR1  | 3.40E-13         |
| B8-130 | AD4001 + HO  | → | ARR1  | 2.58E-11         |
| B8-131 | AD4001 + NO3 | → | ARR1  | 3.40E-13         |
| B8-132 | AK5000 + HO  | → | ARR1  | 4.69E-11         |
| B8-133 | AK5000 + NO3 | → | ARR1  | 8.03E-15         |
| B8-134 | AA4000 + HO  | → | ARR1  | 2.58E-11         |
| B8-135 | AA4000 + NO3 | → | ARR1  | 3.40E-13         |

---

**Table S6 : kinetics.**

| kinetic type | formula                                                                                                                                                                                     |
|--------------|---------------------------------------------------------------------------------------------------------------------------------------------------------------------------------------------|
| ARR1         | $k = x_1$                                                                                                                                                                                   |
| ARR2         | $k = x_1 e^{\frac{-x_2}{T}}$                                                                                                                                                                |
| ARR2(O2)     | $k = x_1 e^{\frac{-x_2}{T}} [O_2]$                                                                                                                                                          |
| ARR3         | $k = x_1 T^{x_2} e^{\frac{-x_3}{T}}$                                                                                                                                                        |
| TROE5        | $k = \frac{k_0 [M]}{1+r} \times x_5 \left( \frac{1}{1+(\log(r))^2} \right)$ $r = \frac{k_0 [M]}{k_{inf}}$ $k_0 = x_1 e^{\frac{-x_2}{T}}$ $k_{inf} = x_3 e^{\frac{-x_4}{T}}$                 |
| TROE7        | $k = \frac{k_0 [M]}{1+r} \times x_7 \left( \frac{1}{1+(\log(r))^2} \right)$ $r = \frac{k_0 [M]}{k_{inf}}$ $k_0 = x_1 T^{x_2} e^{\frac{-x_3}{T}}$ $k_{inf} = x_4 T^{x_5} e^{\frac{-x_6}{T}}$ |
| PHOTO        | $k = x_1$ (value associated to experimental UV lamps see table S7 for atmospheric values depending on zenithal angles)                                                                      |

**Table S7: atmospheric photolysis rates of MG-Cr-Al mechanism.**

| reaction ID | reaction   |   |                 | atmospheric photolysis rates at sea level for the following zenithal angles: 0, 10, 20, 30, 40, 50, 60, 70, 78, 86, 90. |            |            |            |            |            |            |            |            |            |            |
|-------------|------------|---|-----------------|-------------------------------------------------------------------------------------------------------------------------|------------|------------|------------|------------|------------|------------|------------|------------|------------|------------|
| B1-005      | AR0090     | → | AR0089          | 2.3428E-06                                                                                                              | 2.2921E-06 | 2.1428E-06 | 1.9015E-06 | 1.5810E-06 | 1.2023E-06 | 7.9880E-07 | 4.2341E-07 | 1.9324E-07 | 5.2977E-08 | 0.0000E+00 |
| B1-007      | AR0091     | → | AR0089          | 5.0785E-06                                                                                                              | 4.9861E-06 | 4.7112E-06 | 4.2564E-06 | 3.6304E-06 | 2.8533E-06 | 1.9717E-06 | 1.0900E-06 | 5.1457E-07 | 1.4442E-07 | 0.0000E+00 |
| B1-011      | AR0102     | → | AR0028          | 4.9477E-06                                                                                                              | 4.8766E-06 | 4.6626E-06 | 4.2997E-06 | 3.7803E-06 | 3.0985E-06 | 2.2631E-06 | 1.3382E-06 | 6.6756E-07 | 2.0257E-07 | 0.0000E+00 |
| B1-012      | AR0102     | → | AR0120          | 4.9470E-06                                                                                                              | 4.8759E-06 | 4.6620E-06 | 4.2992E-06 | 3.7800E-06 | 3.0984E-06 | 2.2630E-06 | 1.3382E-06 | 6.6755E-07 | 2.0257E-07 | 0.0000E+00 |
| B1-019      | AR0131     | → | AR0028          | 5.0785E-06                                                                                                              | 4.9861E-06 | 4.7112E-06 | 4.2564E-06 | 3.6304E-06 | 2.8533E-06 | 1.9717E-06 | 1.0900E-06 | 5.1457E-07 | 1.4442E-07 | 0.0000E+00 |
| B1-024      | AR0043     | → | AR0013          | 5.0785E-06                                                                                                              | 4.9861E-06 | 4.7112E-06 | 4.2564E-06 | 3.6304E-06 | 2.8533E-06 | 1.9717E-06 | 1.0900E-06 | 5.1457E-07 | 1.4442E-07 | 0.0000E+00 |
| B2-012      | AR0125     | → | AR0098          | 5.0785E-06                                                                                                              | 4.9861E-06 | 4.7112E-06 | 4.2564E-06 | 3.6304E-06 | 2.8533E-06 | 1.9717E-06 | 1.0900E-06 | 5.1457E-07 | 1.4442E-07 | 0.0000E+00 |
| B2-019      | AR0115     | → | AR0114          | 5.0785E-06                                                                                                              | 4.9861E-06 | 4.7112E-06 | 4.2564E-06 | 3.6304E-06 | 2.8533E-06 | 1.9717E-06 | 1.0900E-06 | 5.1457E-07 | 1.4442E-07 | 0.0000E+00 |
| B2-023      | AR0119     | → | AR0118          | 5.0785E-06                                                                                                              | 4.9861E-06 | 4.7112E-06 | 4.2564E-06 | 3.6304E-06 | 2.8533E-06 | 1.9717E-06 | 1.0900E-06 | 5.1457E-07 | 1.4442E-07 | 0.0000E+00 |
| B2-025      | AR0119     | → | AR0114          | 2.6247E-06                                                                                                              | 2.5603E-06 | 2.3712E-06 | 2.0683E-06 | 1.6725E-06 | 1.2176E-06 | 7.5613E-07 | 3.6238E-07 | 1.4906E-07 | 3.4614E-08 | 0.0000E+00 |
| B2-045      | AR0144     | → | AR0116          | 5.0785E-06                                                                                                              | 4.9861E-06 | 4.7112E-06 | 4.2564E-06 | 3.6304E-06 | 2.8533E-06 | 1.9717E-06 | 1.0900E-06 | 5.1457E-07 | 1.4442E-07 | 0.0000E+00 |
| B2-050      | AR0153     | → | AR0152          | 5.0785E-06                                                                                                              | 4.9861E-06 | 4.7112E-06 | 4.2564E-06 | 3.6304E-06 | 2.8533E-06 | 1.9717E-06 | 1.0900E-06 | 5.1457E-07 | 1.4442E-07 | 0.0000E+00 |
| B2-066      | TOL2OHOOH  | → | TOL2OH10        | 5.0785E-06                                                                                                              | 4.9861E-06 | 4.7112E-06 | 4.2564E-06 | 3.6304E-06 | 2.8533E-06 | 1.9717E-06 | 1.0900E-06 | 5.1457E-07 | 1.4442E-07 | 0.0000E+00 |
| B2-073      | TOL3OHOOH  | → | TOL3OH10        | 5.0785E-06                                                                                                              | 4.9861E-06 | 4.7112E-06 | 4.2564E-06 | 3.6304E-06 | 2.8533E-06 | 1.9717E-06 | 1.0900E-06 | 5.1457E-07 | 1.4442E-07 | 0.0000E+00 |
| B2-079      | BTOL3OHOOH | → | BTOL3OH10       | 5.0785E-06                                                                                                              | 4.9861E-06 | 4.7112E-06 | 4.2564E-06 | 3.6304E-06 | 2.8533E-06 | 1.9717E-06 | 1.0900E-06 | 5.1457E-07 | 1.4442E-07 | 0.0000E+00 |
| B2-085      | BTOL4OHOOH | → | BTOL4OH10       | 5.0785E-06                                                                                                              | 4.9861E-06 | 4.7112E-06 | 4.2564E-06 | 3.6304E-06 | 2.8533E-06 | 1.9717E-06 | 1.0900E-06 | 5.1457E-07 | 1.4442E-07 | 0.0000E+00 |
| B2-091      | BTOL5OHOOH | → | BTOL5OH10       | 5.0785E-06                                                                                                              | 4.9861E-06 | 4.7112E-06 | 4.2564E-06 | 3.6304E-06 | 2.8533E-06 | 1.9717E-06 | 1.0900E-06 | 5.1457E-07 | 1.4442E-07 | 0.0000E+00 |
| B3-012      | AR0094     | → | AR0092          | 5.0785E-06                                                                                                              | 4.9861E-06 | 4.7112E-06 | 4.2564E-06 | 3.6304E-06 | 2.8533E-06 | 1.9717E-06 | 1.0900E-06 | 5.1457E-07 | 1.4442E-07 | 0.0000E+00 |
| B3-014      | AR0093     | → | AR0092          | 2.6247E-06                                                                                                              | 2.5603E-06 | 2.3712E-06 | 2.0683E-06 | 1.6725E-06 | 1.2176E-06 | 7.5613E-07 | 3.6238E-07 | 1.4906E-07 | 3.4614E-08 | 0.0000E+00 |
| B3-016      | AR0104     | → | DD2000 + 3U5002 | 3.5040E-06                                                                                                              | 3.4163E-06 | 3.1587E-06 | 2.7458E-06 | 2.2064E-06 | 1.5881E-06 | 9.6628E-07 | 4.4655E-07 | 1.7521E-07 | 3.7601E-08 | 0.0000E+00 |
| B3-027      | AR0134     | → | ED5000          | 5.0785E-06                                                                                                              | 4.9861E-06 | 4.7112E-06 | 4.2564E-06 | 3.6304E-06 | 2.8533E-06 | 1.9717E-06 | 1.0900E-06 | 5.1457E-07 | 1.4442E-07 | 0.0000E+00 |
| B3-039      | AR0048     | → | ED4001          | 5.0785E-06                                                                                                              | 4.9861E-06 | 4.7112E-06 | 4.2564E-06 | 3.6304E-06 | 2.8533E-06 | 1.9717E-06 | 1.0900E-06 | 5.1457E-07 | 1.4442E-07 | 0.0000E+00 |
| B4-001      | AR0087     | → | AR0010 + 3K2000 | 4.2133E-03                                                                                                              | 4.1616E-03 | 4.0054E-03 | 3.7377E-03 | 3.3478E-03 | 2.8206E-03 | 2.1419E-03 | 1.3273E-03 | 6.7405E-04 | 2.0948E-04 | 0.0000E+00 |
| B4-002      | AR0087     | → | 2U6000          | 4.2133E-03                                                                                                              | 4.1616E-03 | 4.0054E-03 | 3.7377E-03 | 3.3478E-03 | 2.8206E-03 | 2.1419E-03 | 1.3273E-03 | 6.7405E-04 | 2.0948E-04 | 0.0000E+00 |
| B4-012      | AR0106     | → | 2U6000          | 5.0785E-06                                                                                                              | 4.9861E-06 | 4.7112E-06 | 4.2564E-06 | 3.6304E-06 | 2.8533E-06 | 1.9717E-06 | 1.0900E-06 | 5.1457E-07 | 1.4442E-07 | 0.0000E+00 |
| B4-013      | AR0106     | → | 2U6000          | 4.9477E-06                                                                                                              | 4.8766E-06 | 4.6626E-06 | 4.2997E-06 | 3.7803E-06 | 3.0985E-06 | 2.2631E-06 | 1.3382E-06 | 6.6756E-07 | 2.0257E-07 | 0.0000E+00 |

|        |        |   |                            |            |            |            |            |            |            |            |            |            |            |            |
|--------|--------|---|----------------------------|------------|------------|------------|------------|------------|------------|------------|------------|------------|------------|------------|
| B4-014 | AR0106 | → | 2U6000                     | 4.9470E-06 | 4.8759E-06 | 4.6620E-06 | 4.2992E-06 | 3.7800E-06 | 3.0984E-06 | 2.2630E-06 | 1.3382E-06 | 6.6755E-07 | 2.0257E-07 | 0.0000E+00 |
| B4-016 | AR0107 | → | 2U6000                     | 4.9477E-06 | 4.8766E-06 | 4.6626E-06 | 4.2997E-06 | 3.7803E-06 | 3.0985E-06 | 2.2631E-06 | 1.3382E-06 | 6.6756E-07 | 2.0257E-07 | 0.0000E+00 |
| B4-017 | AR0107 | → | 2U6000                     | 4.9470E-06 | 4.8759E-06 | 4.6620E-06 | 4.2992E-06 | 3.7800E-06 | 3.0984E-06 | 2.2630E-06 | 1.3382E-06 | 6.6755E-07 | 2.0257E-07 | 0.0000E+00 |
| B4-024 | AR0109 | → | AR0010 + 3K2000            | 4.7518E-05 | 4.6558E-05 | 4.3706E-05 | 3.9012E-05 | 3.2618E-05 | 2.4837E-05 | 1.6330E-05 | 8.3723E-06 | 3.6409E-06 | 8.8371E-07 | 0.0000E+00 |
| B4-025 | AR0109 | → | AR0010                     | 3.5040E-06 | 3.4163E-06 | 3.1587E-06 | 2.7458E-06 | 2.2064E-06 | 1.5881E-06 | 9.6628E-07 | 4.4655E-07 | 1.7521E-07 | 3.7601E-08 | 0.0000E+00 |
| B4-026 | AR0110 | → | AR0108                     | 5.0785E-06 | 4.9861E-06 | 4.7112E-06 | 4.2564E-06 | 3.6304E-06 | 2.8533E-06 | 1.9717E-06 | 1.0900E-06 | 5.1457E-07 | 1.4442E-07 | 0.0000E+00 |
| B4-027 | AR0110 | → | AR0108                     | 4.7518E-05 | 4.6558E-05 | 4.3706E-05 | 3.9012E-05 | 3.2618E-05 | 2.4837E-05 | 1.6330E-05 | 8.3723E-06 | 3.6409E-06 | 8.8371E-07 | 0.0000E+00 |
| B4-028 | AR0110 | → | AR0108                     | 3.5040E-06 | 3.4163E-06 | 3.1587E-06 | 2.7458E-06 | 2.2064E-06 | 1.5881E-06 | 9.6628E-07 | 4.4655E-07 | 1.7521E-07 | 3.7601E-08 | 0.0000E+00 |
| B4-032 | AR0124 | → | AR0010 + 3K2000            | 4.7518E-05 | 4.6558E-05 | 4.3706E-05 | 3.9012E-05 | 3.2618E-05 | 2.4837E-05 | 1.6330E-05 | 8.3723E-06 | 3.6409E-06 | 8.8371E-07 | 0.0000E+00 |
| B4-033 | AR0124 | → | AR0010 + 3K2000            | 2.3733E-04 | 2.3449E-04 | 2.2592E-04 | 2.1124E-04 | 1.8985E-04 | 1.6085E-04 | 1.2324E-04 | 7.7278E-05 | 3.9313E-05 | 1.2097E-05 | 0.0000E+00 |
| B5-003 | UU7000 | → | 0.5 1U6000 + 0.5<br>3U7000 | 6.1120E-05 | 5.9787E-05 | 5.5856E-05 | 4.9496E-05 | 4.1040E-05 | 3.1045E-05 | 2.0431E-05 | 1.0667E-05 | 4.8105E-06 | 1.2849E-06 | 0.0000E+00 |
| B6-003 | UD4000 | → | FURON                      | 4.8875E-04 | 4.8275E-04 | 4.6463E-04 | 4.3358E-04 | 3.8835E-04 | 3.2719E-04 | 2.4847E-04 | 1.5397E-04 | 7.8188E-05 | 2.4300E-05 | 0.0000E+00 |
| B6-004 | UD4000 | → | MALAHY                     | 4.8875E-04 | 4.8275E-04 | 4.6463E-04 | 4.3358E-04 | 3.8835E-04 | 3.2719E-04 | 2.4847E-04 | 1.5397E-04 | 7.8188E-05 | 2.4300E-05 | 0.0000E+00 |
| B6-010 | UD6000 | → | UD5000                     | 9.4770E-06 | 9.2366E-06 | 8.5314E-06 | 7.4036E-06 | 5.9347E-06 | 4.2580E-06 | 2.5810E-06 | 1.1880E-06 | 4.6507E-07 | 9.9632E-08 | 0.0000E+00 |
| B6-014 | UD5000 | → | MFUR                       | 6.6571E-04 | 6.5754E-04 | 6.3285E-04 | 5.9056E-04 | 5.2896E-04 | 4.4566E-04 | 3.3843E-04 | 2.0971E-04 | 1.0650E-04 | 3.3098E-05 | 0.0000E+00 |
| B6-015 | UD5000 | → | MALAHY                     | 6.6571E-04 | 6.5754E-04 | 6.3285E-04 | 5.9056E-04 | 5.2896E-04 | 4.4566E-04 | 3.3843E-04 | 2.0971E-04 | 1.0650E-04 | 3.3098E-05 | 0.0000E+00 |
| B6-019 | UD5001 | → | FURON                      | 4.8875E-04 | 4.8275E-04 | 4.6463E-04 | 4.3358E-04 | 3.8835E-04 | 3.2719E-04 | 2.4847E-04 | 1.5397E-04 | 7.8188E-05 | 2.4300E-05 | 0.0000E+00 |
| B6-020 | UD5001 | → | MALAHY                     | 4.8875E-04 | 4.8275E-04 | 4.6463E-04 | 4.3358E-04 | 3.8835E-04 | 3.2719E-04 | 2.4847E-04 | 1.5397E-04 | 7.8188E-05 | 2.4300E-05 | 0.0000E+00 |
| B6-038 | DK3000 | → | 3K2000                     | 7.6968E-05 | 7.5838E-05 | 7.2455E-05 | 6.6780E-05 | 5.8776E-05 | 4.8426E-05 | 3.5847E-05 | 2.1662E-05 | 1.0736E-05 | 3.1607E-06 | 0.0000E+00 |
| B6-043 | PU5001 | → | 3U5001                     | 8.0298E-07 | 7.8532E-07 | 7.3328E-07 | 6.4911E-07 | 5.3727E-07 | 4.0517E-07 | 2.6517E-07 | 1.3707E-07 | 6.0989E-08 | 1.5874E-08 | 0.0000E+00 |
| B6-046 | P02000 | → | 3K2000                     | 8.0298E-07 | 7.8532E-07 | 7.3328E-07 | 6.4911E-07 | 5.3727E-07 | 4.0517E-07 | 2.6517E-07 | 1.3707E-07 | 6.0989E-08 | 1.5874E-08 | 0.0000E+00 |
| B7-008 | PU5002 | → | 3K2000                     | 4.7467E-07 | 4.6782E-07 | 4.4722E-07 | 4.1230E-07 | 3.6239E-07 | 2.9696E-07 | 2.1687E-07 | 1.2826E-07 | 6.3971E-08 | 1.9414E-08 | 0.0000E+00 |
| B7-009 | PU5002 | → | 3U5002                     | 8.0298E-07 | 7.8532E-07 | 7.3328E-07 | 6.4911E-07 | 5.3727E-07 | 4.0517E-07 | 2.6517E-07 | 1.3707E-07 | 6.0989E-08 | 1.5874E-08 | 0.0000E+00 |
| B7-015 | PH5002 | → | 3H5004                     | 8.0298E-07 | 7.8532E-07 | 7.3328E-07 | 6.4911E-07 | 5.3727E-07 | 4.0517E-07 | 2.6517E-07 | 1.3707E-07 | 6.0989E-08 | 1.5874E-08 | 0.0000E+00 |
| B7-016 | PH5002 | → | 3K2000                     | 3.2931E-06 | 3.2172E-06 | 2.9944E-06 | 2.6364E-06 | 2.1655E-06 | 1.6171E-06 | 1.0461E-06 | 5.3456E-07 | 2.3663E-07 | 6.1208E-08 | 0.0000E+00 |
| B7-017 | PH5002 | → | 1P5006                     | 5.0785E-06 | 4.9861E-06 | 4.7112E-06 | 4.2564E-06 | 3.6304E-06 | 2.8533E-06 | 1.9717E-06 | 1.0900E-06 | 5.1457E-07 | 1.4442E-07 | 0.0000E+00 |
| B7-021 | PK5001 | → | 3K2000                     | 3.2931E-06 | 3.2172E-06 | 2.9944E-06 | 2.6364E-06 | 2.1655E-06 | 1.6171E-06 | 1.0461E-06 | 5.3456E-07 | 2.3663E-07 | 6.1208E-08 | 0.0000E+00 |
| B7-033 | PH5004 | → | 3H5009                     | 8.0298E-07 | 7.8532E-07 | 7.3328E-07 | 6.4911E-07 | 5.3727E-07 | 4.0517E-07 | 2.6517E-07 | 1.3707E-07 | 6.0989E-08 | 1.5874E-08 | 0.0000E+00 |
| B7-034 | PH5004 | → | 1P500A                     | 5.0785E-06 | 4.9861E-06 | 4.7112E-06 | 4.2564E-06 | 3.6304E-06 | 2.8533E-06 | 1.9717E-06 | 1.0900E-06 | 5.1457E-07 | 1.4442E-07 | 0.0000E+00 |
| B7-041 | PU5000 | → | 3U5000                     | 8.0298E-07 | 7.8532E-07 | 7.3328E-07 | 6.4911E-07 | 5.3727E-07 | 4.0517E-07 | 2.6517E-07 | 1.3707E-07 | 6.0989E-08 | 1.5874E-08 | 0.0000E+00 |
| B7-048 | PH5000 | → | 3H5000                     | 8.0298E-07 | 7.8532E-07 | 7.3328E-07 | 6.4911E-07 | 5.3727E-07 | 4.0517E-07 | 2.6517E-07 | 1.3707E-07 | 6.0989E-08 | 1.5874E-08 | 0.0000E+00 |

|        |        |   |        |            |            |            |            |            |            |            |            |            |            |            |
|--------|--------|---|--------|------------|------------|------------|------------|------------|------------|------------|------------|------------|------------|------------|
| B7-051 | GU5002 | → | 3K2000 | 4.7467E-07 | 4.6782E-07 | 4.4722E-07 | 4.1230E-07 | 3.6239E-07 | 2.9696E-07 | 2.1687E-07 | 1.2826E-07 | 6.3971E-08 | 1.9414E-08 | 0.0000E+00 |
| B7-052 | GU5002 | → | 1D4000 | 5.0785E-06 | 4.9861E-06 | 4.7112E-06 | 4.2564E-06 | 3.6304E-06 | 2.8533E-06 | 1.9717E-06 | 1.0900E-06 | 5.1457E-07 | 1.4442E-07 | 0.0000E+00 |
| B7-054 | GH5002 | → | 3K2000 | 3.2931E-06 | 3.2172E-06 | 2.9944E-06 | 2.6364E-06 | 2.1655E-06 | 1.6171E-06 | 1.0461E-06 | 5.3456E-07 | 2.3663E-07 | 6.1208E-08 | 0.0000E+00 |
| B7-055 | GH5002 | → | DK4000 | 5.0785E-06 | 4.9861E-06 | 4.7112E-06 | 4.2564E-06 | 3.6304E-06 | 2.8533E-06 | 1.9717E-06 | 1.0900E-06 | 5.1457E-07 | 1.4442E-07 | 0.0000E+00 |
| B7-063 | PD5002 | → | 3P4000 | 7.6968E-05 | 7.5838E-05 | 7.2455E-05 | 6.6780E-05 | 5.8776E-05 | 4.8426E-05 | 3.5847E-05 | 2.1662E-05 | 1.0736E-05 | 3.1607E-06 | 0.0000E+00 |
| B7-067 | PP4000 | → | 3P4000 | 1.6060E-06 | 1.5710E-06 | 1.4670E-06 | 1.3000E-06 | 1.0740E-06 | 8.1000E-07 | 5.3030E-07 | 2.7400E-07 | 1.2200E-07 | 3.1750E-08 | 0.0000E+00 |
| B7-070 | PP4004 | → | 3P400X | 8.0298E-07 | 7.8532E-07 | 7.3328E-07 | 6.4911E-07 | 5.3727E-07 | 4.0517E-07 | 2.6517E-07 | 1.3707E-07 | 6.0989E-08 | 1.5874E-08 | 0.0000E+00 |
| B8-002 | AR0027 | → |        | 7.6968E-05 | 7.5838E-05 | 7.2455E-05 | 6.6780E-05 | 5.8776E-05 | 4.8426E-05 | 3.5847E-05 | 2.1662E-05 | 1.0736E-05 | 3.1607E-06 | 0.0000E+00 |
| B8-004 | AR0113 | → |        | 2.3733E-04 | 2.3449E-04 | 2.2592E-04 | 2.1124E-04 | 1.8985E-04 | 1.6085E-04 | 1.2324E-04 | 7.7278E-05 | 3.9313E-05 | 1.2097E-05 | 0.0000E+00 |
| B8-009 | AR0128 | → |        | 2.3733E-04 | 2.3449E-04 | 2.2592E-04 | 2.1124E-04 | 1.8985E-04 | 1.6085E-04 | 1.2324E-04 | 7.7278E-05 | 3.9313E-05 | 1.2097E-05 | 0.0000E+00 |
| B8-051 | AR0010 | → |        | 4.7518E-05 | 4.6558E-05 | 4.3706E-05 | 3.9012E-05 | 3.2618E-05 | 2.4837E-05 | 1.6330E-05 | 8.3723E-06 | 3.6409E-06 | 8.8371E-07 | 0.0000E+00 |
| B8-054 | AR0039 | → |        | 5.0785E-06 | 4.9861E-06 | 4.7112E-06 | 4.2564E-06 | 3.6304E-06 | 2.8533E-06 | 1.9717E-06 | 1.0900E-06 | 5.1457E-07 | 1.4442E-07 | 0.0000E+00 |
| B8-055 | AR0039 | → |        | 4.7518E-05 | 4.6558E-05 | 4.3706E-05 | 3.9012E-05 | 3.2618E-05 | 2.4837E-05 | 1.6330E-05 | 8.3723E-06 | 3.6409E-06 | 8.8371E-07 | 0.0000E+00 |
| B8-072 | CH20   | → |        | 6.8710E-05 | 6.7475E-05 | 6.3788E-05 | 5.766E-05  | 4.9187E-05 | 3.8601E-05 | 2.6545E-05 | 1.4525E-05 | 6.7686E-06 | 1.8278E-06 | 0.0000E+00 |
| B8-076 | PU5002 | → |        | 4.7467E-06 | 4.6782E-06 | 4.4722E-06 | 4.1230E-06 | 3.6239E-06 | 2.9696E-06 | 2.1687E-06 | 1.2826E-06 | 6.3971E-07 | 1.9414E-07 | 0.0000E+00 |
| B8-079 | PK5001 | → |        | 7.6968E-05 | 7.5838E-05 | 7.2455E-05 | 6.6780E-05 | 5.8776E-05 | 4.8426E-05 | 3.5847E-05 | 2.1662E-05 | 1.0736E-05 | 3.1607E-06 | 0.0000E+00 |
| B8-083 | PH5004 | → |        | 3.2931E-06 | 3.2172E-06 | 2.9944E-06 | 2.6364E-06 | 2.1655E-06 | 1.6171E-06 | 1.0461E-06 | 5.3456E-07 | 2.3663E-07 | 6.1208E-08 | 0.0000E+00 |
| B8-086 | PU5000 | → |        | 8.6282E-06 | 8.5040E-06 | 8.1303E-06 | 7.4964E-06 | 6.5900E-06 | 5.4009E-06 | 3.9442E-06 | 2.3329E-06 | 1.1651E-06 | 3.5431E-07 | 0.0000E+00 |
| B8-092 | PH5000 | → |        | 2.3927E-05 | 1.4130E-05 | 1.3153E-05 | 1.1576E-05 | 9.4902E-06 | 7.0482E-06 | 4.5048E-06 | 2.2484E-06 | 9.6452E-07 | 2.3922E-07 | 0.0000E+00 |
| B8-094 | GU5002 | → |        | 4.7467E-06 | 4.6782E-06 | 4.4722E-06 | 4.1230E-06 | 3.6239E-06 | 2.9696E-06 | 2.1687E-06 | 1.2826E-06 | 6.3971E-07 | 1.9414E-07 | 0.0000E+00 |
| B8-098 | GH5002 | → |        | 5.0785E-06 | 4.9861E-06 | 4.7112E-06 | 4.2564E-06 | 3.6304E-06 | 2.8533E-06 | 1.9717E-06 | 1.0900E-06 | 5.1457E-07 | 1.4442E-07 | 0.0000E+00 |
| B8-101 | PK5003 | → |        | 8.0261E-05 | 7.9055E-05 | 7.5449E-05 | 6.9416E-05 | 6.0941E-05 | 5.0043E-05 | 3.6893E-05 | 2.2197E-05 | 1.0973E-05 | 3.2219E-06 | 0.0000E+00 |
| B8-106 | PD5002 | → |        | 8.5400E-06 | 8.4200E-06 | 8.0500E-06 | 7.4200E-06 | 6.5300E-06 | 5.4000E-06 | 4.0000E-06 | 2.4000E-06 | 1.1900E-06 | 3.5000E-07 | 0.0000E+00 |
| B8-111 | PP4004 | → |        | 7.6968E-05 | 7.5838E-05 | 7.2455E-05 | 6.6780E-05 | 5.8776E-05 | 4.8426E-05 | 3.5847E-05 | 2.1662E-05 | 1.0736E-05 | 3.1607E-06 | 0.0000E+00 |
| B8-112 | DD2000 | → |        | 4.4037E-06 | 4.3088E-06 | 4.0280E-06 | 3.5702E-06 | 2.9552E-06 | 2.2207E-06 | 1.4365E-06 | 7.2308E-07 | 3.1019E-07 | 7.4586E-08 | 0.0000E+00 |
| B8-113 | DD2000 | → |        | 3.2716E-05 | 3.2197E-05 | 3.0644E-05 | 2.8043E-05 | 2.4392E-05 | 1.9722E-05 | 1.4180E-05 | 8.2364E-06 | 3.9854E-06 | 1.1449E-06 | 0.0000E+00 |
| B8-114 | DD2000 | → |        | 1.8343E-05 | 1.7972E-05 | 1.6870E-05 | 1.5061E-05 | 1.2604E-05 | 9.6214E-06 | 6.3626E-06 | 3.2994E-06 | 1.4538E-06 | 3.6451E-07 | 0.0000E+00 |
| B8-119 | PU5001 | → |        | 2.9336E-06 | 2.8914E-06 | 2.7643E-06 | 2.5488E-06 | 2.2406E-06 | 1.8363E-06 | 1.3410E-06 | 7.9317E-07 | 3.9615E-07 | 1.2047E-07 | 0.0000E+00 |
| B8-120 | PU5001 | → |        | 2.8473E-06 | 2.8063E-06 | 2.6830E-06 | 2.4738E-06 | 2.1747E-06 | 1.7823E-06 | 1.3016E-06 | 7.6984E-07 | 3.8450E-07 | 1.1692E-07 | 0.0000E+00 |
| B8-121 | PU5001 | → |        | 2.8473E-06 | 2.8063E-06 | 2.6830E-06 | 2.4738E-06 | 2.1747E-06 | 1.7823E-06 | 1.3016E-06 | 7.6984E-07 | 3.8450E-07 | 1.1692E-07 | 0.0000E+00 |



**Table S8: list of changes between MG, MG-Cr and MG-Cr-Al mechanism (not including loss reactions).**

| reaction ID | MG                                                               | MG-Cr                                                                                                                                                                                         | MG-Cr-Al                                                                                                                                                                                      |
|-------------|------------------------------------------------------------------|-----------------------------------------------------------------------------------------------------------------------------------------------------------------------------------------------|-----------------------------------------------------------------------------------------------------------------------------------------------------------------------------------------------|
| B0-001      | TOL + HO → 0.65 AR0086 + 0.07 AR0085 + 0.18 AR0088 + 0.10 AR0087 | TOL + HO → 0.65 AR0086 + 0.07 AR0085 + 0.18 AR0088 + 0.10 AR0087                                                                                                                              | TOL + HO → 0.60 AR0086 + 0.07 AR0085 + .1674 AR0088 + 0.05 AR0087 + 0.10 UU7000 + .0126 NTOL                                                                                                  |
| B2-001      | AR0088 + HO → 0.073 AR0098 + 0.20 AR0099 + 0.727 AR0100          | AR0088 + HO → 0.073 AR0098 + 0.20 AR0099 + 0.727 AR0100                                                                                                                                       | AR0088 + HO → 0.068 AR0098 + 0.186 AR0099 + 0.676 AR0100 + 0.07 BZALDOH                                                                                                                       |
| B2-007      | AR0099 + HO2 → AR0115                                            | AR0099 + HO2 → 0.35 AR0115 + 0.65 AR0114                                                                                                                                                      | AR0099 + HO2 → 0.35 AR0115 + 0.65 AR0114                                                                                                                                                      |
| B2-016      | AR0114 → 0.32 AR0127 + 0.68 AU5002 + 0.68 DD2000                 | AR0114 → 0.32 AR0127 + 0.68 BTOL2OH10                                                                                                                                                         | AR0114 → 0.32 AR0127 + 0.68 BTOL2OH10                                                                                                                                                         |
| B2-017      |                                                                  | BTOL2OH10 → 0.350 AU5002 + 0.350 DD2000 + 0.140 UD5002 + 0.140 DD2000 + 0.250 UD5000 + 0.250 AD2000 + 0.095 UD4000 + 0.095 AK3000 + 0.090 AU5000 + 0.090 DD2000 + 0.075 AU4000 + 0.075 DK3000 | BTOL2OH10 → 0.350 AU5002 + 0.350 DD2000 + 0.140 UD5002 + 0.140 DD2000 + 0.250 UD5000 + 0.250 AD2000 + 0.095 UD4000 + 0.095 AK3000 + 0.090 AU5000 + 0.090 DD2000 + 0.075 AU4000 + 0.075 DK3000 |
| B2-027      | AR0127 + HO → AR0140                                             | AR0127 + HO → AR0140                                                                                                                                                                          | AR0127 + HO → 0.93 AR0140 + 0.07 Me6Cy1U3K                                                                                                                                                    |
| B2-035      | AR0100 + HO → AR0116                                             | AR0100 + HO → 0.07 AR0116 + 0.065 MBQN10H + 0.73 TOL3OH + 0.135 BTOL3OH2O                                                                                                                     | AR0100 + HO → 0.07 AR0116 + 0.065 MBQN10H + 0.73 TOL3OH + 0.135 BTOL3OH2O                                                                                                                     |
| B2-052      | AR0152 → AD2000                                                  | AR0152 → AD2000                                                                                                                                                                               | AR0152 → AD2000 + AU50DN                                                                                                                                                                      |
| B2-053      |                                                                  |                                                                                                                                                                                               | AU50DN + HO → FURR6                                                                                                                                                                           |
| B2-054      |                                                                  |                                                                                                                                                                                               | FURR6 + HO → radFURR6                                                                                                                                                                         |
| B2-055      |                                                                  |                                                                                                                                                                                               | radFURR6 + HO2 → FURR6OHOH                                                                                                                                                                    |
| B2-056      |                                                                  |                                                                                                                                                                                               | radFURR6 + NO → DK3000                                                                                                                                                                        |
| B2-057      |                                                                  |                                                                                                                                                                                               | radFURR6 + NO3 → DK3000                                                                                                                                                                       |
| B2-058      |                                                                  |                                                                                                                                                                                               | FURR6OHOH + HO → radFURR6                                                                                                                                                                     |
| B2-059      |                                                                  | TOL3OH + HO → 0.07 TOL2OH10 + 0.07 MBQN2OH + 0.73 TOL4OH + 0.13 BTOL4OH2O                                                                                                                     | TOL3OH + HO → 0.07 TOL2OH10 + 0.07 MBQN2OH + 0.73 TOL4OH + 0.13 BTOL4OH2O                                                                                                                     |
| B2-060      |                                                                  | TOL4OH + HO → 0.07 TOL3OH10 + 0.07 MBQN3OH + 0.73 TOL5OH + 0.13 BTOL5OH2O                                                                                                                     | TOL4OH + HO → 0.07 TOL3OH10 + 0.07 MBQN3OH + 0.73 TOL5OH + 0.13 BTOL5OH2O                                                                                                                     |
| B2-061      |                                                                  | TOL2OH10 + NO2 → TOL3OH1NO2                                                                                                                                                                   | TOL2OH10 + NO2 → TOL3OH1NO2                                                                                                                                                                   |
| B2-062      |                                                                  | TOL2OH10 + O3 → TOL2OH2O                                                                                                                                                                      | TOL2OH10 + O3 → TOL2OH2O                                                                                                                                                                      |
| B2-063      |                                                                  | TOL2OH2O + HO2 → TOL2OHOOH                                                                                                                                                                    | TOL2OH2O + HO2 → TOL2OHOOH2                                                                                                                                                                   |
| B2-064      |                                                                  | TOL2OH2O + NO → TOL2OH1O                                                                                                                                                                      | TOL2OH2O + NO → TOL2OH1O                                                                                                                                                                      |
| B2-065      |                                                                  | TOL2OH2O + NO3 → TOL2OH1O                                                                                                                                                                     | TOL2OH2O + NO3 → TOL2OH1O                                                                                                                                                                     |

| reaction ID | MG | MG-Cr                                                                                                                                                                                         | MG-Cr-Al                                                                                                                                                                                      |
|-------------|----|-----------------------------------------------------------------------------------------------------------------------------------------------------------------------------------------------|-----------------------------------------------------------------------------------------------------------------------------------------------------------------------------------------------|
| B2-066      |    | TOL2OHOOH → TOL2OH10                                                                                                                                                                          | TOL2OHOOH → TOL2OH10                                                                                                                                                                          |
| B2-067      |    | TOL2OHOOH + HO → TOL2OH20                                                                                                                                                                     | TOL2OHOOH + HO → TOL2OH20                                                                                                                                                                     |
| B2-068      |    | TOL3OH10 + NO2 → TOL4OH1NO2                                                                                                                                                                   | TOL3OH10 + NO2 → TOL4OH1NO2                                                                                                                                                                   |
| B2-069      |    | TOL3OH10 + O3 → TOL3OH20                                                                                                                                                                      | TOL3OH10 + O3 → TOL3OH20                                                                                                                                                                      |
| B2-070      |    | TOL3OH20 + HO2 → TOL3OHOOH                                                                                                                                                                    | TOL3OH20 + HO2 → TOL3OHOOH2                                                                                                                                                                   |
| B2-071      |    | TOL3OH20 + NO → TOL3OH10                                                                                                                                                                      | TOL3OH20 + NO → TOL3OH10                                                                                                                                                                      |
| B2-072      |    | TOL3OH20 + NO3 → TOL3OH10                                                                                                                                                                     | TOL3OH20 + NO3 → TOL3OH10                                                                                                                                                                     |
| B2-073      |    | TOL3OHOOH → TOL3OH10                                                                                                                                                                          | TOL3OHOOH → TOL3OH10                                                                                                                                                                          |
| B2-074      |    | TOL3OHOOH + HO → TOL3OH20                                                                                                                                                                     | TOL3OHOOH + HO → TOL3OH20                                                                                                                                                                     |
| B2-075      |    | BTOL3OH20 + HO2 → 0.65 BTOL3OH10 + 0.35 BTOL3OHOOH                                                                                                                                            | BTOL3OH20 + HO2 → 0.65 BTOL3OH10 + 0.35 BTOL3OHOOH                                                                                                                                            |
| B2-076      |    | BTOL3OH20 + NO3 → BTOL3OH10                                                                                                                                                                   | BTOL3OH20 + NO3 → BTOL3OH10                                                                                                                                                                   |
| B2-077      |    | BTOL3OH20 + NO → BTOL3OH10                                                                                                                                                                    | BTOL3OH20 + NO → BTOL3OH10                                                                                                                                                                    |
| B2-078      |    | BTOL3OH10 → 0.165 AD5000 + 0.165 DD2000 + 0.165 UD5000 + 0.165 AA2000 + 0.165 AU5000 + 0.165 AD2000 + 0.165 DK5000 + 0.165 DD2000 + 0.165 AD4000 + 0.165 DK3000 + 0.165 AU4000 + 0.165 AK3000 | BTOL3OH10 → 0.165 AD5000 + 0.165 DD2000 + 0.165 UD5000 + 0.165 AA2000 + 0.165 AU5000 + 0.165 AD2000 + 0.165 DK5000 + 0.165 DD2000 + 0.165 AD4000 + 0.165 DK3000 + 0.165 AU4000 + 0.165 AK3000 |
| B2-079      |    | BTOL3OHOOH → BTOL3OH10                                                                                                                                                                        | BTOL3OHOOH → BTOL3OH10                                                                                                                                                                        |
| B2-080      |    | BTOL3OHOOH + HO → BTOL3OH20                                                                                                                                                                   | BTOL3OHOOH + HO → BTOL3OH20                                                                                                                                                                   |
| B2-081      |    | BTOL4OH20 + HO2 → 0.65 BTOL4OH10 + 0.35 BTOL4OHOOH                                                                                                                                            | BTOL4OH20 + HO2 → 0.65 BTOL4OH10 + 0.35 BTOL4OHOOH                                                                                                                                            |
| B2-082      |    | BTOL4OH20 + NO3 → BTOL4OH10                                                                                                                                                                   | BTOL4OH20 + NO3 → BTOL4OH10                                                                                                                                                                   |
| B2-083      |    | BTOL4OH20 + NO → BTOL4OH10                                                                                                                                                                    | BTOL4OH20 + NO → BTOL4OH10                                                                                                                                                                    |
| B2-084      |    | BTOL4OH10 → 0.250 AD4001 + 0.250 DK3000 + 0.250 AD5000 + 0.250 AD2000 + 0.250 AU5000 + 0.250 AA2000 + 0.250 AK5000 + 0.250 DD2000                                                             | BTOL4OH10 → 0.250 AD4001 + 0.250 DK3000 + 0.250 AD5000 + 0.250 AD2000 + 0.250 AU5000 + 0.250 AA2000 + 0.250 AK5000 + 0.250 DD2000                                                             |
| B2-085      |    | BTOL4OHOOH → BTOL4OH10                                                                                                                                                                        | BTOL4OHOOH → BTOL4OH10                                                                                                                                                                        |
| B2-086      |    | BTOL4OHOOH + HO → BTOL4OH20                                                                                                                                                                   | BTOL4OHOOH + HO → BTOL4OH20                                                                                                                                                                   |
| B2-087      |    | BTOL5OH20 + HO2 → 0.65 BTOL5OH10 + 0.35 BTOL5OHOOH                                                                                                                                            | BTOL5OH20 + HO2 → 0.65 BTOL5OH10 + 0.35 BTOL5OHOOH                                                                                                                                            |
| B2-088      |    | BTOL5OH20 + NO3 → BTOL5OH10                                                                                                                                                                   | BTOL5OH20 + NO3 → BTOL5OH10                                                                                                                                                                   |
| B2-089      |    | BTOL5OH20 + NO → BTOL5OH10                                                                                                                                                                    | BTOL5OH20 + NO → BTOL5OH10                                                                                                                                                                    |

| reaction ID | MG                                                                                                    | MG-Cr                                                                                                                             | MG-Cr-Al                                                                                                                                                                 |
|-------------|-------------------------------------------------------------------------------------------------------|-----------------------------------------------------------------------------------------------------------------------------------|--------------------------------------------------------------------------------------------------------------------------------------------------------------------------|
| B2-090      |                                                                                                       | BTOL5OH10 → 0.250 AD5000 + 0.250 AA2000 + 0.250 AA4000 + 0.250 DK3000 + 0.250 AD4001 + 0.250 AK3000 + 0.250 AK5000 + 0.250 AD2000 | BTOL5OH10 → 0.250 AD5000 + 0.250 AA2000 + 0.250 AA4000 + 0.250 DK3000 + 0.250 AD4001 + 0.250 AK3000 + 0.250 AK5000 + 0.250 AD2000                                        |
| B2-091      |                                                                                                       | BTOL5OHOOH → BTOL5OH10                                                                                                            | BTOL5OHOOH → BTOL5OH10                                                                                                                                                   |
| B2-092      |                                                                                                       | BTOL5OHOOH + HO → BTOL5OH20                                                                                                       | BTOL5OHOOH + HO → BTOL5OH20                                                                                                                                              |
| B3-004      |                                                                                                       |                                                                                                                                   | AR0086 → radHOM70                                                                                                                                                        |
| B3-005      |                                                                                                       |                                                                                                                                   | radHOM70 → radHOM90                                                                                                                                                      |
| B3-006      |                                                                                                       |                                                                                                                                   | radHOM70 + NO → 0.80 HOM10 + 0.20 HOM10NO2                                                                                                                               |
| B3-007      |                                                                                                       |                                                                                                                                   | radHOM70 + HO2 → HOM10OH                                                                                                                                                 |
| B3-008      |                                                                                                       |                                                                                                                                   | radHOM90 + NO → 0.80 HOM20 + 0.20 HOM20NO2                                                                                                                               |
| B3-009      |                                                                                                       |                                                                                                                                   | radHOM90 + HO2 → HOM20OH                                                                                                                                                 |
| B3-010      | AR0092 → 0.60 DD2000 + 0.40 DK3000 + 0.20 UD5000 + 0.20 UD5001 + 0.20 FURON + 0.20 MFUR + 0.20 UD4000 | AR0092 → 0.60 DD2000 + 0.40 DK3000 + 0.20 UD5000 + 0.20 UD5001 + 0.20 FURON + 0.20 MFUR + 0.20 UD4000                             | AR0092 → 0.15 UD5001 + 0.15 DD2000 + 0.15 UD5000 + 0.15 DD2000 + 0.05 MFUR + 0.05 DD2000 + 0.20 UD4000 + 0.20 DK3000 + 0.30 FURR5 + 0.30 CH2O + 0.15 FURR3 + 0.15 D02000 |
| B3-011      | FURR5 + HO → FUROH                                                                                    | FURR5 + HO → FUROH                                                                                                                | FURR5 + HO → FUROH                                                                                                                                                       |
| B3-019      | MFUR + NO3 → AR0121                                                                                   | MFUR + NO3 → AR0121                                                                                                               | MFUR + NO3 → AR0121                                                                                                                                                      |
| B3-020      | MFUR + O3 → AR0121                                                                                    | MFUR + O3 → AR0121                                                                                                                | MFUR + O3 → AR0121                                                                                                                                                       |
| B3-029      | ED5000 + HO →                                                                                         | ED5000 + HO →                                                                                                                     | ED5000 + HO → radED5000                                                                                                                                                  |
| B3-030      |                                                                                                       |                                                                                                                                   | radED5000 + NO → radED5002                                                                                                                                               |
| B3-031      |                                                                                                       |                                                                                                                                   | radED5000 + HO2 → 0.56 ED5000OOH + 0.44 radED5002                                                                                                                        |
| B3-032      |                                                                                                       |                                                                                                                                   | ED5000OOH + HO → radED5000                                                                                                                                               |
| B3-033      |                                                                                                       |                                                                                                                                   | radED5002 + NO → 3K2000 + CH2O                                                                                                                                           |
| B3-034      |                                                                                                       |                                                                                                                                   | radED5002 + HO2 → ED5002OOH2                                                                                                                                             |
| B3-035      |                                                                                                       |                                                                                                                                   | ED5002OOH + HO → radED5002                                                                                                                                               |
| B3-041      | ED4001 + HO →                                                                                         | ED4001 + HO →                                                                                                                     | ED4001 + HO → radED4001                                                                                                                                                  |
| B3-042      |                                                                                                       |                                                                                                                                   | radED4001 + NO → CH2O                                                                                                                                                    |
| B3-043      |                                                                                                       |                                                                                                                                   | radED4001 + HO2 → HD2000                                                                                                                                                 |
| B3-044      |                                                                                                       |                                                                                                                                   | HD2000 + HO → DD2000                                                                                                                                                     |

| reaction ID | MG                                      | MG-Cr                                   | MG-Cr-Al                                                                                                                       |
|-------------|-----------------------------------------|-----------------------------------------|--------------------------------------------------------------------------------------------------------------------------------|
| B5-001      |                                         |                                         | UU7000 + HO → 0.32 3U7000 + 0.68 2U7000                                                                                        |
| B5-002      |                                         |                                         | UU7000 + NO3 → 0.08 3U7000 + 0.92 2U7000                                                                                       |
| B5-003      |                                         |                                         | UU7000 → 0.5 1U6000 + 0.5 3U7000                                                                                               |
| B5-004      |                                         |                                         | 2U7000 + NO → 1U7000                                                                                                           |
| B5-005      |                                         |                                         | 2U7000 + NO3 → 1U7000                                                                                                          |
| B5-006      |                                         |                                         | 1U7000 → 0.125 UD7000 + 0.500 UD6000 + 0.125 UD4000 + 0.125 DK3000 + 0.125 UD5000 + 0.125 DD2000 + 0.125 UD5001 + 0.125 A02000 |
| B5-007      |                                         |                                         | 3U7000 + NO → 1U6000                                                                                                           |
| B5-008      |                                         |                                         | 3U7000 + NO3 → 1U6000                                                                                                          |
| B5-009      |                                         |                                         | UD7000 + HO → 2D7000                                                                                                           |
| B5-010      |                                         |                                         | AU7000 + HO → 2D7000                                                                                                           |
| B5-011      |                                         |                                         | 2D7000 + NO → 1D7000                                                                                                           |
| B5-012      |                                         |                                         | 2D7000 + HO2 → AU70002                                                                                                         |
| B5-013      |                                         |                                         | 2D7000 + NO3 → 1D7000                                                                                                          |
| B5-014      |                                         |                                         | 1D7000 → 0.05 AU5002 + 0.05 AD2000 + 0.35 AU4000 + 0.35 AK3000 + 0.35 DK4000 + 0.35 DK3000 + 0.25 DD3000 + 0.25 DK4001         |
| B5-015      |                                         |                                         | AU6000 + HO → 2D6000                                                                                                           |
| B5-016      |                                         |                                         | UD6000 + HO → 2D6001                                                                                                           |
| B5-017      |                                         |                                         | 2D6000 + NO → 1D6000                                                                                                           |
| B5-018      |                                         |                                         | 2D6000 + HO2 → DK4000 + AD20002                                                                                                |
| B5-019      |                                         |                                         | 2D6000 + NO3 → 1D6000                                                                                                          |
| B5-020      |                                         |                                         | 2D6001 + NO → 1D6001                                                                                                           |
| B5-021      |                                         |                                         | 2D6001 + HO2 → AU60002                                                                                                         |
| B5-022      |                                         |                                         | 2D6001 + NO3 → 1D6001                                                                                                          |
| B5-023      |                                         |                                         | 1D6000 → AD2000 + DK4000                                                                                                       |
| B5-024      |                                         |                                         | 1D6001 → DK3000 + DD3000                                                                                                       |
| B6-011      | UD5000 + HO → 0.54 3U5002 + 0.23 2D5003 | UD5000 + HO → 0.54 3U5002 + 0.23 2D5003 | UD5000 + HO → 0.54 3U5002 + 0.23 FURR6 + 0.23 2D5003                                                                           |

### Part 3: Experimental and modeling speciation data

Table S9: Gas and particle chemical composition measured by CHARON/PTR-ToF-MS for a subset of six experiments.

| N° exp                                      | 6   | 7   | 13  | 14  | 21   | 22   |
|---------------------------------------------|-----|-----|-----|-----|------|------|
| Toluene init. (ppbv)                        | 112 | 112 | 112 | 112 | 112  | 66   |
| Toluene fin. (ppbv)                         | 61  | 59  | 59  | 60  | 63   | 38   |
| Temperature (K)                             | 295 | 295 | 285 | 285 | 280  | 280  |
| Ammonium sulf. ( $\mu\text{g}/\text{m}^3$ ) | 9.0 | 9.0 | 8.0 | 6.0 | 9.0  | 9.0  |
| RH (%)                                      | 30  | 24  | 23  | 24  | 24   | 24   |
| SOA AMS ( $\mu\text{g}/\text{m}^3$ )        | 6.7 | 8.2 | 7.8 | 6.5 | 15.7 | 10.0 |

#### CHARON/PTR-ToF-MS data ( $\mu\text{g}/\text{m}^3$ )

| SOA CHARON ( $\mu\text{g}/\text{m}^3$ ) | 4.2    | 4.9   | 5.4    | 4.7   | 12.4   | 7.2   |        |       |        |       |        |       |
|-----------------------------------------|--------|-------|--------|-------|--------|-------|--------|-------|--------|-------|--------|-------|
| SOA CHARON/SOA AMS                      | 0.63   | 0.59  | 0.70   | 0.73  | 0.79   | 0.72  |        |       |        |       |        |       |
| m/z                                     | gas    | part. |        |       |
| <b>31.019</b>                           | 1.770  |       | 2.472  |       | 2.634  |       | 1.935  |       | 2.858  | 2.784 |        |       |
| <b>44.019</b>                           | 0.303  | 0.005 | 0.248  | 0.002 | 0.170  | 0.004 | 0.203  | 0.002 | 0.250  | 0.010 | 0.236  | 0.005 |
| <b>44.024</b>                           | 0.296  |       | 0.446  |       | 0.366  |       | 0.289  |       | 0.393  |       | 0.395  |       |
| <b>45.034</b>                           | 4.769  | 0.108 | 7.737  |       | 6.715  |       | 4.047  |       | 5.862  |       | 5.632  |       |
| <b>47.010</b>                           | 14.417 | 0.152 | 16.111 | 0.070 | 9.429  | 0.115 | 11.836 | 0.102 | 12.671 | 0.205 | 11.673 | 0.108 |
| <b>57.05</b>                            | 1.685  |       | 1.508  |       | 1.112  |       | 1.431  |       | 1.224  |       | 0.970  |       |
| <b>61.030</b>                           | 14.709 | 0.391 | 19.382 | 0.062 | 13.230 | 0.183 | 10.236 | 0.094 | 15.114 | 0.440 | 14.574 | 0.281 |
| <b>62.031</b>                           | 0.373  | 0.086 | 0.644  | 0.002 | 0.353  | 0.004 | 0.233  | 0.005 | 0.367  | 0.010 | 0.396  | 0.005 |
| <b>63.044</b>                           | 0.393  | 0.000 | 0.451  | 0.001 | 0.350  | 0.001 | 0.258  | 0.001 | 0.305  | 0.000 | 0.328  | 0.003 |
| <b>63.045</b>                           | 0.060  | 0.001 | 0.520  | 0.000 | 0.420  | 0.003 | 0.318  | 0.001 | 0.373  | 0.001 | 0.379  | 0.000 |
| <b>64.010</b>                           | 0.176  | 0.001 | 0.409  | 0.000 | 0.329  | 0.003 | 0.058  | 0.000 | 0.372  | 0.001 | 0.259  | 0.001 |
| <b>65.041</b>                           | 2.276  | 0.014 | 0.322  | 0.013 | 0.051  | 0.023 | 0.200  | 0.024 | 0.078  | 0.028 | 0.133  | 0.018 |
| <b>69.035</b>                           |        | 0.005 |        | 0.009 |        | 0.015 |        | 0.019 |        | 0.040 |        | 0.018 |

|               |        |       |        |       |        |       |        |       |        |       |        |       |
|---------------|--------|-------|--------|-------|--------|-------|--------|-------|--------|-------|--------|-------|
| <b>71.015</b> | 0.185  | 0.002 | 0.258  | 0.050 | 0.130  | 0.059 | 0.155  | 0.041 | 0.146  | 0.106 | 0.121  | 0.070 |
| <b>71.050</b> | 0.355  | 0.026 | 0.428  | 0.009 | 0.233  | 0.017 | 0.330  | 0.015 | 0.264  | 0.041 | 0.149  | 0.021 |
| <b>73.030</b> | 11.316 | 0.273 | 11.133 | 0.284 | 9.000  | 0.391 | 10.363 | 0.323 | 10.411 | 0.563 | 6.863  | 0.389 |
| <b>74.028</b> | 0.796  | 0.008 | 1.024  | 0.014 | 0.462  | 0.017 | 0.713  | 0.014 | 0.628  | 0.033 | 0.444  | 0.022 |
| <b>75.008</b> | 0.163  | 0.022 |        | 0.040 |        | 0.035 |        | 0.032 |        | 0.065 |        | 0.054 |
| <b>75.043</b> | 0.606  | 0.064 | 1.058  | 0.008 | 0.662  | 0.018 | 0.616  | 0.008 | 0.710  | 0.069 | 0.645  | 0.033 |
| <b>77.025</b> | 2.450  | 0.004 | 3.467  | 0.011 | 2.378  | 0.010 | 2.244  | 0.010 | 2.580  | 0.023 | 2.335  | 0.014 |
| <b>77.058</b> | 1.065  | 0.004 | 2.643  |       | 2.770  |       | 1.184  |       | 2.725  |       | 2.919  |       |
| <b>79.040</b> | 0.694  | 0.003 | 0.753  | 0.010 | 0.416  | 0.015 | 0.310  | 0.012 | 0.409  | 0.016 | 0.456  | 0.015 |
| <b>79.071</b> | 0.529  | 0.023 | 0.539  |       | 0.287  |       | 0.446  |       | 0.414  |       | 0.235  |       |
| <b>81.035</b> | 0.079  | 0.003 | 0.189  | 0.001 | 0.112  | 0.002 | 0.167  | 0.003 | 0.143  | 0.012 | 0.134  | 0.005 |
| <b>83.014</b> | 0.021  | 0.012 | 0.324  | 0.030 | 0.101  | 0.045 | 0.045  | 0.031 | 0.131  | 0.070 | 0.133  | 0.046 |
| <b>83.050</b> | 0.136  | 0.023 | 0.225  | 0.033 | 0.094  | 0.048 | 0.133  | 0.039 | 0.157  | 0.111 | 0.087  | 0.058 |
| <b>85.032</b> | 2.697  | 0.116 | 3.580  | 0.116 | 1.754  | 0.135 | 3.021  | 0.151 | 2.024  | 0.309 | 1.453  | 0.177 |
| <b>85.065</b> | 0.146  | 0.017 | 0.144  |       | 0.022  |       | 0.087  |       | 0.034  |       | 0.030  |       |
| <b>87.013</b> | 0.415  | 0.014 | 0.552  | 0.011 | 0.311  | 0.010 | 0.405  | 0.009 | 0.431  | 0.020 | 0.332  | 0.015 |
| <b>87.045</b> | 1.352  | 0.068 | 1.471  | 0.057 | 0.480  | 0.085 | 0.692  | 0.077 | 0.592  | 0.172 | 0.493  | 0.103 |
| <b>89.025</b> | 1.614  | 0.151 | 1.927  | 0.193 | 0.746  | 0.217 | 1.015  | 0.202 | 0.843  | 0.379 | 0.761  | 0.253 |
| <b>89.060</b> | 0.129  | 0.034 | 0.362  |       | 0.358  |       | 0.525  |       | 0.317  |       | 0.333  |       |
| <b>90.021</b> | 0.149  | 0.005 | 0.247  | 0.015 | 0.090  | 0.013 | 0.082  | 0.013 | 0.105  | 0.022 | 0.080  | 0.015 |
| <b>91.040</b> | 1.062  | 0.025 | 1.316  | 0.024 | 0.906  | 0.042 | 0.907  | 0.039 | 0.901  | 0.058 | 0.583  | 0.041 |
| <b>91.057</b> | 1.600  |       | 3.134  |       | 2.757  |       | 3.343  |       | 3.432  |       | 2.133  |       |
| <b>93.028</b> |        | 0.051 |        | 0.019 |        | 0.026 |        | 0.018 |        | 0.028 |        | 0.020 |
| <b>95.050</b> | 0.206  | 0.010 | 0.427  | 0.014 | 0.275  | 0.020 | 0.376  | 0.010 | 0.348  | 0.092 | 0.235  | 0.040 |
| <b>95.081</b> |        |       | 0.285  | 0.000 | 0.259  | 0.006 | 0.324  | 0.007 | 0.310  | 0.001 | 0.142  | 0.000 |
| <b>97.029</b> | 0.091  | 0.067 | 1.282  | 0.090 | 0.174  | 0.103 | 0.361  | 0.094 | 0.283  | 0.207 | 0.270  | 0.122 |
| <b>97.064</b> | 0.241  | 0.026 | 0.290  | 0.021 | 0.071  | 0.000 | 0.095  | 0.000 | 0.115  | 0.151 | 0.094  | 0.056 |
| <b>98.027</b> |        | 0.014 |        | 0.024 |        | 0.022 |        | 0.015 |        | 0.049 |        | 0.030 |
| <b>99.009</b> | 20.597 | 0.090 | 20.724 |       | 11.176 |       | 17.307 |       | 14.180 | 0.055 | 12.553 | 0.021 |

|                |       |       |       |       |       |       |       |       |       |       |       |       |
|----------------|-------|-------|-------|-------|-------|-------|-------|-------|-------|-------|-------|-------|
| <b>99.045</b>  | 2.540 | 0.122 | 5.022 | 0.177 | 2.489 | 0.235 | 3.106 | 0.192 | 2.803 | 0.493 | 1.811 | 0.293 |
| <b>100.014</b> | 0.899 | 0.000 | 0.897 | 0.001 | 0.528 | 0.004 | 0.792 | 0.002 | 0.632 | 0.006 | 0.557 | 0.001 |
| <b>100.047</b> | 0.195 | 0.009 | 0.355 | 0.022 | 0.150 | 0.026 | 0.189 | 0.024 | 0.167 | 0.049 | 0.111 | 0.030 |
| <b>101.026</b> | 1.291 | 0.199 | 1.982 | 0.161 | 0.571 | 0.181 | 0.725 | 0.163 | 0.804 | 0.312 | 0.675 | 0.214 |
| <b>101.060</b> | 0.417 | 0.020 | 2.219 | 0.001 | 1.961 | 0.000 | 1.156 | 0.003 | 2.114 | 0.003 | 1.991 | 0.000 |
| <b>102.024</b> |       | 0.008 |       | 0.018 |       | 0.018 |       | 0.017 |       | 0.032 |       | 0.022 |
| <b>103.039</b> | 0.361 | 0.118 | 0.423 | 0.163 | 0.178 | 0.214 | 0.210 | 0.178 | 0.204 | 0.337 | 0.149 | 0.228 |
| <b>104.039</b> |       | 0.003 |       | 0.010 |       | 0.010 |       | 0.010 |       | 0.022 |       | 0.013 |
| <b>105.036</b> | 2.216 | 0.003 | 2.217 | 0.019 | 1.335 | 0.013 | 1.160 | 0.016 | 1.500 | 0.024 | 1.377 | 0.016 |
| <b>107.048</b> | 7.169 | 0.006 | 7.154 | 0.007 | 6.001 | 0.003 | 6.531 | 0.004 | 6.523 | 0.028 | 4.022 | 0.010 |
| <b>108.059</b> | 0.839 |       | 0.881 |       | 0.713 |       | 0.794 |       | 0.814 |       | 0.494 |       |
| <b>109.030</b> | 1.054 | 0.014 | 0.926 |       | 0.382 |       | 0.546 |       | 0.551 |       | 0.520 |       |
| <b>109.064</b> | 5.562 |       | 5.238 |       | 3.210 |       | 4.164 |       | 3.484 |       | 2.171 |       |
| <b>110.071</b> | 0.454 |       | 0.450 |       | 0.257 |       | 0.363 |       | 0.303 |       | 0.189 |       |
| <b>111.016</b> |       | 0.009 |       | 0.010 |       | 0.010 |       | 0.010 |       | 0.027 |       | 0.017 |
| <b>111.046</b> | 0.410 | 0.051 | 0.767 | 0.115 | 0.203 | 0.141 | 0.385 | 0.125 | 0.390 | 0.349 | 0.297 | 0.181 |
| <b>111.057</b> |       |       | 0.168 |       | 0.057 |       | 0.102 |       | 0.046 |       | 0.036 |       |
| <b>112.045</b> |       | 0.002 |       | 0.011 |       | 0.015 |       | 0.008 |       | 0.040 |       | 0.020 |
| <b>113.025</b> | 3.200 | 0.178 | 5.239 | 0.121 | 1.480 | 0.145 | 2.408 | 0.127 | 2.108 | 0.294 | 2.582 | 0.183 |
| <b>113.057</b> | 0.328 | 0.031 | 0.481 | 0.018 | 0.056 | 0.023 | 0.156 | 0.024 | 0.095 | 0.086 | 0.125 | 0.043 |
| <b>114.023</b> | 0.273 | 0.003 | 0.455 | 0.027 | 0.146 | 0.015 | 0.237 | 0.013 | 0.195 | 0.044 | 0.221 | 0.030 |
| <b>115.017</b> | 0.172 | 0.001 | 0.207 | 0.003 | 0.102 | 0.021 | 0.134 | 0.009 | 0.092 | 0.028 | 0.091 | 0.016 |
| <b>115.041</b> | 0.338 | 0.127 | 1.139 | 0.163 | 0.250 | 0.185 | 0.356 | 0.175 | 0.316 | 0.345 | 0.266 | 0.224 |
| <b>115.074</b> |       |       | 0.289 |       | 0.112 |       | 0.130 |       | 0.085 |       | 0.089 |       |
| <b>116.039</b> |       | 0.006 |       | 0.013 |       | 0.013 |       | 0.013 |       | 0.029 |       | 0.018 |
| <b>117.020</b> | 1.517 | 0.030 | 1.461 | 0.136 | 0.528 | 0.151 | 0.906 | 0.111 | 0.675 | 0.277 | 0.605 | 0.196 |
| <b>117.053</b> | 0.674 | 0.018 | 0.699 | 0.007 | 0.450 | 0.009 | 0.455 | 0.011 | 0.451 | 0.023 | 0.463 | 0.011 |
| <b>119.036</b> |       | 0.007 |       | 0.016 |       | 0.019 |       | 0.020 |       | 0.037 |       | 0.025 |
| <b>122.014</b> |       |       | 0.392 |       | 0.347 |       | 0.359 |       | 0.407 |       | 0.327 |       |

|                |       |       |       |       |       |       |       |       |       |       |       |       |
|----------------|-------|-------|-------|-------|-------|-------|-------|-------|-------|-------|-------|-------|
| <b>122.035</b> | 0.670 |       | 0.733 |       | 0.519 |       | 0.652 |       | 0.687 |       | 0.591 |       |
| <b>123.046</b> | 5.600 | 0.027 | 5.433 | 0.040 | 2.446 | 0.064 | 2.994 | 0.050 | 3.048 | 0.147 | 2.885 | 0.069 |
| <b>124.048</b> | 0.669 | 0.011 | 0.659 | 0.019 | 0.315 | 0.018 | 0.440 | 0.011 | 0.423 | 0.052 | 0.319 | 0.025 |
| <b>125.028</b> | 0.126 |       | 0.186 |       | 0.079 |       | 0.112 |       | 0.115 |       | 0.092 |       |
| <b>127.042</b> | 0.202 | 0.257 | 0.503 | 0.320 | 0.108 | 0.380 | 0.166 | 0.320 | 0.204 | 0.780 | 0.165 | 0.490 |
| <b>127.069</b> |       |       | 0.138 |       | 0.097 |       | 0.150 |       | 0.092 |       | 0.087 |       |
| <b>128.040</b> | 0.000 | 0.032 | 0.000 | 0.029 | 0.000 | 0.020 | 0.000 | 0.019 | 0.000 | 0.081 | 0.000 | 0.043 |
| <b>129.019</b> | 0.063 | 0.050 | 0.176 | 0.100 | 0.034 | 0.080 | 0.049 | 0.071 | 0.077 | 0.179 | 0.064 | 0.120 |
| <b>129.054</b> | 0.117 | 0.056 | 0.187 | 0.065 | 0.050 | 0.085 | 0.099 | 0.081 | 0.084 | 0.212 | 0.057 | 0.111 |
| <b>130.054</b> |       | 0.002 |       | 0.007 |       | 0.005 |       | 0.008 |       | 0.022 |       | 0.009 |
| <b>131.036</b> |       | 0.036 |       | 0.088 |       | 0.101 |       | 0.101 |       | 0.220 |       | 0.149 |
| <b>133.050</b> |       | 0.003 |       | 0.016 |       | 0.021 |       | 0.016 |       | 0.033 |       | 0.022 |
| <b>136.039</b> | 1.821 |       | 2.796 | 0.002 | 2.449 | 0.002 | 2.407 | 0.002 | 2.855 | 0.008 | 1.978 | 0.002 |
| <b>138.054</b> | 4.729 |       | 7.419 |       | 2.759 |       | 3.604 |       | 3.391 |       | 2.890 |       |
| <b>139.044</b> | 1.044 | 0.125 | 1.412 | 0.150 | 0.476 | 0.171 | 0.642 | 0.130 | 0.672 | 0.454 | 0.634 | 0.235 |
| <b>139.061</b> | 0.467 |       | 0.681 |       | 0.179 |       | 0.301 |       | 0.350 |       | 0.307 |       |
| <b>139.074</b> |       | 0.005 |       | 0.001 |       | 0.002 |       | 0.002 |       | 0.008 |       | 0.006 |
| <b>140.039</b> | 1.249 | 0.010 | 1.416 | 0.041 | 1.018 | 0.031 | 1.262 | 0.031 | 1.385 | 0.090 | 1.134 | 0.046 |
| <b>140.067</b> | 0.150 |       | 0.251 |       | 0.134 |       | 0.176 |       | 0.200 |       | 0.139 |       |
| <b>141.019</b> | 0.057 | 0.019 | 0.144 | 0.042 | 0.044 | 0.029 | 0.058 | 0.032 | 0.057 | 0.067 | 0.049 | 0.047 |
| <b>141.054</b> | 0.207 | 0.034 | 0.266 | 0.079 | 0.130 | 0.093 | 0.158 | 0.074 | 0.191 | 0.305 | 0.163 | 0.146 |
| <b>141.087</b> |       | 0.012 | 0.403 | 0.003 | 0.210 | 0.003 | 0.229 | 0.006 | 0.231 | 0.009 | 0.207 | 0.003 |
| <b>142.056</b> | 0.070 | 0.008 |       | 0.018 |       | 0.015 |       | 0.010 |       | 0.054 |       | 0.025 |
| <b>143.037</b> | 0.115 | 0.152 | 0.308 | 0.166 | 0.051 | 0.166 | 0.104 | 0.141 | 0.091 | 0.327 | 0.083 | 0.219 |
| <b>143.072</b> | 0.077 | 0.011 | 0.271 | 0.007 | 0.214 | 0.004 | 0.229 | 0.005 | 0.209 | 0.019 | 0.205 | 0.007 |
| <b>144.035</b> |       | 0.003 |       | 0.025 |       | 0.019 |       | 0.023 |       | 0.049 |       | 0.039 |
| <b>145.052</b> |       | 0.027 |       | 0.039 |       | 0.048 |       | 0.091 |       | 0.096 |       | 0.058 |
| <b>147.029</b> |       | 0.008 |       | 0.015 |       | 0.008 |       | 0.010 |       | 0.023 |       | 0.012 |
| <b>149.027</b> |       | 0.009 |       | 0.004 |       | 0.005 |       | 0.022 |       | 0.006 |       | 0.006 |



|                |       |       |       |       |       |       |       |       |       |       |       |       |
|----------------|-------|-------|-------|-------|-------|-------|-------|-------|-------|-------|-------|-------|
| <b>152.034</b> |       | 0.001 |       | 0.010 |       | 0.001 |       | 0.006 |       | 0.040 |       | 0.014 |
| <b>153.056</b> |       | 0.001 |       | 0.000 |       | 0.001 |       | 0.004 |       | 0.007 |       | 0.002 |
| <b>154.052</b> | 3.226 | 0.009 | 6.944 | 0.034 | 5.548 | 0.033 | 4.204 | 0.015 | 5.945 | 0.118 | 4.715 | 0.052 |
| <b>136.044</b> | 0.500 | 0.156 | 0.542 | 0.293 | 0.122 | 0.276 | 0.079 | 0.211 | 0.219 | 0.643 | 0.117 | 0.386 |
| <b>155.058</b> | 0.158 |       | 0.407 |       | 0.460 |       | 0.505 |       | 0.483 |       | 0.368 |       |
| <b>156.029</b> | 0.413 | 0.000 |       | 0.047 |       | 0.029 |       | 0.024 |       | 0.093 |       | 0.050 |
| <b>157.031</b> | 0.079 | 0.056 |       | 0.037 |       | 0.054 |       | 0.035 |       | 0.033 |       | 0.044 |
| <b>157.053</b> | 0.050 | 0.056 | 0.529 | 0.170 | 0.035 | 0.163 | 0.237 | 0.132 | 0.204 | 0.638 | 0.210 | 0.294 |
| <b>158.051</b> |       | 0.005 |       | 0.026 |       | 0.022 |       | 0.018 |       | 0.078 |       | 0.041 |
| <b>159.031</b> |       | 0.034 |       | 0.055 |       | 0.036 |       | 0.041 |       | 0.082 |       | 0.053 |
| <b>159.060</b> |       | 0.000 |       | 0.010 |       | 0.006 |       | 0.010 |       | 0.046 |       | 0.020 |
| <b>161.043</b> |       | 0.003 |       | 0.026 |       | 0.022 |       | 0.034 |       | 0.056 |       | 0.036 |
| <b>168.034</b> | 0.257 | 0.002 | 0.444 | 0.011 | 0.038 | 0.012 | 0.049 | 0.008 | 0.135 | 0.032 | 0.129 | 0.016 |
| <b>169.048</b> |       | 0.000 |       | 0.006 |       | 0.004 |       | 0.008 |       | 0.014 |       | 0.007 |
| <b>170.048</b> |       | 0.004 |       | 0.031 |       | 0.063 |       | 0.060 |       | 0.200 |       | 0.037 |
| <b>171.034</b> | 0.016 | 0.035 | 0.207 | 0.125 | 0.010 | 0.034 | 0.020 | 0.035 | 0.047 | 0.188 | 0.023 | 0.098 |
| <b>171.077</b> | 0.003 | 0.009 | 0.027 | 0.006 | 0.003 | 0.002 | 0.028 | 0.007 | 0.009 | 0.007 | 0.001 | 0.003 |
| <b>173.050</b> |       | 0.034 |       | 0.113 |       | 0.087 |       | 0.059 |       | 0.302 |       | 0.162 |
| <b>174.056</b> |       | 0.003 |       | 0.012 |       | 0.009 |       | 0.008 |       | 0.034 |       | 0.019 |
| <b>175.029</b> |       |       |       | 0.009 |       | 0.005 |       | 0.014 |       | 0.005 |       | 0.005 |
| <b>175.061</b> |       | 0.004 |       | 0.015 |       | 0.007 |       | 0.012 |       | 0.050 |       | 0.024 |
| <b>184.030</b> |       |       |       | 0.012 |       | 0.002 |       | 0.007 |       | 0.020 |       | 0.011 |
| <b>185.036</b> |       |       |       | 0.009 |       | 0.004 |       | 0.009 |       | 0.014 |       | 0.008 |
| <b>186.034</b> |       | 0.004 |       | 0.024 |       | 0.012 |       | 0.007 |       | 0.057 |       | 0.030 |
| <b>186.052</b> |       | 0.004 |       | 0.004 |       | 0.008 |       | 0.009 |       | 0.022 |       | 0.010 |
| <b>187.023</b> |       | 0.003 |       | 0.014 |       | 0.003 |       | 0.005 |       | 0.022 |       | 0.011 |
| <b>187.044</b> |       | 0.002 |       | 0.009 |       | 0.003 |       | 0.020 |       | 0.007 |       | 0.007 |
| <b>189.037</b> |       | 0.016 |       | 0.019 |       | 0.014 |       | 0.012 |       | 0.029 |       | 0.017 |
| <b>189.054</b> |       | 0.002 |       | 0.010 |       | 0.004 |       | 0.012 |       | 0.015 |       | 0.009 |

**Table S10: Final concentrations of simulated secondary species - mechanism development section (in  $\mu\text{g}/\text{m}^3$ ).**

| m/z | species   | MG     |       |         |       | MG-Cr  |       |         |       | MG-Cr-Al |       |         |       |
|-----|-----------|--------|-------|---------|-------|--------|-------|---------|-------|----------|-------|---------|-------|
|     |           | 280 K  |       | 295 K   |       | 280 K  |       | 295 K   |       | 280 K    |       | 295 K   |       |
|     |           | gas    | part. | gas     | part. | gas    | part. | gas     | part. | gas      | part. | gas     | part. |
| 31  | CH2O      | 0.115  | 0     | 0.136   | 0     | 0.117  | 0     | 0.137   | 0     | 4.326    | 0     | 4.321   | 0     |
| 45  | D02000    | 0      | 0     | 0       | 0     | 0      | 0     | 0       | 0     | 4.271    | 0     | 4.33    | 0     |
| 59  | DD2000    | 39.062 | 0     | 39.445  | 0     | 39.283 | 0     | 39.524  | 0     | 30.804   | 0     | 31.045  | 0     |
| 61  | A02000    | 0      | 0     | 0       | 0     | 0      | 0     | 0       | 0     | 0.526    | 0     | 0.543   | 0     |
| 73  | DK3000    | 11.905 | 0     | 13      | 0     | 12.268 | 0     | 13.464  | 0     | 8.098    | 0     | 8.995   | 0     |
| 75  | AD2000    | 0.224  | 0     | 0.703   | 0     | 0.73   | 0     | 0.885   | 0     | 0.711    | 0     | 0.84    | 0     |
| 76  | 3K2000    | 0.022  | 0     | 0.028   | 0     | 0.023  | 0     | 0.028   | 0     | 0.018    | 0     | 0.023   | 0     |
| 76  | radED4001 | 0      | 0     | 0       | 0     | 0      | 0     | 0       | 0     | 0.003    | 0     | 0.003   | 0     |
| 77  | HD2000    | 0      | 0     | 0       | 0     | 0      | 0     | 0       | 0     | 0.062    | 0     | 0.062   | 0     |
| 85  | FURON     | 3.273  | 0     | 3.057   | 0     | 3.283  | 0     | 3.067   | 0     | 0.668    | 0     | 0.606   | 0     |
| 85  | UD4000    | 1.485  | 0     | 1.419   | 0     | 1.531  | 0     | 1.466   | 0     | 1.528    | 0     | 1.458   | 0     |
| 87  | DD3001    | 0.721  | 0     | 0.897   | 0     | 0.719  | 0     | 0.888   | 0     | 0.359    | 0     | 0.443   | 0     |
| 89  | AK3000    | 0      | 0     | 0       | 0     | 0.665  | 0     | 0.738   | 0     | 0.681    | 0     | 0.794   | 0     |
| 89  | DD3000    | 0      | 0     | 0       | 0     | 0      | 0     | 0       | 0     | 1.102    | 0.017 | 1.09    | 0.004 |
| 91  | AA2000    | 0      | 0     | 0       | 0     | 0.575  | 0.003 | 0.741   | 0.001 | 0.535    | 0.002 | 0.659   | 0.001 |
| 93  | TOL       | 245.9  | 0     | 243.416 | 0     | 245.9  | 0     | 243.416 | 0     | 245.9    | 0     | 243.416 | 0     |
| 94  | AR0013    | 0.015  | 0     | 0.017   | 0     | 0.015  | 0     | 0.017   | 0     | 0.015    | 0     | 0.017   | 0     |
| 97  | FURR3     | 0      | 0     | 0       | 0     | 0      | 0     | 0       | 0     | 0.382    | 0     | 0.363   | 0     |
| 99  | MALAHY    | 4.88   | 0     | 4.651   | 0.025 | 5.051  | 0     | 4.824   | 0.025 | 4.535    | 0     | 4.332   | 0.022 |
| 99  | MFUR      | 2.322  | 0     | 2.171   | 0     | 2.36   | 0     | 2.208   | 0     | 0.928    | 0     | 0.858   | 0     |
| 99  | UD5000    | 2.184  | 0     | 2.092   | 0     | 2.361  | 0     | 2.266   | 0     | 2.257    | 0     | 2.154   | 0     |
| 99  | UD5001    | 1.743  | 0     | 1.666   | 0     | 1.743  | 0     | 1.666   | 0     | 1.345    | 0     | 1.282   | 0     |
| 101 | AR0010    | 1.293  | 0     | 1.454   | 0     | 1.283  | 0     | 1.389   | 0     | 0.641    | 0     | 0.689   | 0     |
| 101 | AU4000    | 0      | 0     | 0       | 0     | 0.224  | 0.004 | 0.221   | 0.001 | 0.236    | 0.004 | 0.256   | 0.001 |
| 101 | DK4001    | 0      | 0     | 0       | 0     | 0      | 0     | 0       | 0     | 0.05     | 0     | 0.078   | 0     |
| 102 | 1D4000    | 0      | 0     | 0       | 0     | 0      | 0     | 0       | 0     | 0        | 0     | 0       | 0     |
| 102 | 1D4001    | 0      | 0     | 0       | 0     | 0      | 0     | 0       | 0     | 0        | 0     | 0       | 0     |
| 103 | DK4000    | 1.158  | 0.002 | 1.131   | 0     | 1.158  | 0.002 | 1.131   | 0.001 | 0.673    | 0.002 | 0.693   | 0     |
| 107 | AR0102    | 6.519  | 0     | 6.478   | 0     | 6.52   | 0     | 6.478   | 0     | 6.52     | 0     | 6.478   | 0     |
| 108 | AR0089    | 0      | 0     | 0       | 0     | 0      | 0     | 0       | 0     | 0        | 0     | 0       | 0     |
| 108 | AR0098    | 0.011  | 0     | 0.011   | 0     | 0.011  | 0     | 0.011   | 0     | 0.01     | 0     | 0.01    | 0     |
| 109 | AR0088    | 7.479  | 0.001 | 6.95    | 0     | 7.479  | 0.001 | 6.95    | 0     | 6.956    | 0     | 6.463   | 0     |
| 110 | AR0028    | 0.025  | 0     | 0.032   | 0     | 0.025  | 0     | 0.032   | 0     | 0.025    | 0     | 0.032   | 0     |

|     |         |        |       |        |       |        |       |        |       |        |       |       |       |
|-----|---------|--------|-------|--------|-------|--------|-------|--------|-------|--------|-------|-------|-------|
| 111 | AR0043  | 0.085  | 0     | 0.105  | 0     | 0.085  | 0     | 0.105  | 0     | 0.085  | 0     | 0.105 | 0     |
| 111 | FURR5   | 0      | 0     | 0      | 0     | 0      | 0     | 0      | 0     | 0.777  | 0     | 0.738 | 0     |
| 113 | FURR6   | 0      | 0     | 0      | 0     | 0      | 0     | 0      | 0     | 2.688  | 0.136 | 2.95  | 0.023 |
| 115 | AU5000  | 0      | 0     | 0      | 0     | 0.285  | 0.015 | 0.323  | 0.002 | 0.262  | 0.011 | 0.282 | 0.002 |
| 115 | AU5002  | 1.928  | 0.006 | 2.146  | 0.001 | 1.112  | 0.003 | 1.135  | 0.001 | 1.001  | 0.002 | 1.023 | 0     |
| 115 | UD5002  | 0      | 0     | 0      | 0     | 0.147  | 0.001 | 0.146  | 0     | 0.127  | 0.001 | 0.126 | 0     |
| 117 | AD4000  | 0      | 0     | 0      | 0     | 0.078  | 0.229 | 0.159  | 0.057 | 0.069  | 0.2   | 0.138 | 0.052 |
| 117 | AR0040  | 0.085  | 0     | 0.097  | 0     | 0.085  | 0     | 0.095  | 0     | 0.042  | 0     | 0.048 | 0     |
| 117 | ED4001  | 3.947  | 0     | 4.29   | 0     | 3.947  | 0     | 4.177  | 0     | 0.636  | 0     | 0.636 | 0     |
| 122 | P02000  | 25.798 | 0     | 26.647 | 0     | 26.246 | 0     | 27.052 | 0     | 20.833 | 0     | 21.61 | 0     |
| 123 | AR0127  | 0.704  | 0     | 0.801  | 0     | 0.883  | 0     | 0.894  | 0     | 0.766  | 0     | 0.772 | 0     |
| 123 | AR0132  | 0.103  | 0     | 0.112  | 0     | 0.103  | 0     | 0.112  | 0     | 0.103  | 0     | 0.112 | 0     |
| 123 | BZALDOH | 0      | 0     | 0      | 0     | 0      | 0     | 0      | 0     | 1.068  | 0.001 | 1.045 | 0     |
| 124 | AR0085  | 0.023  | 0     | 0.025  | 0     | 0.023  | 0     | 0.025  | 0     | 0.023  | 0     | 0.025 | 0     |
| 124 | AR0112  | 0.009  | 0     | 0.011  | 0     | 0.009  | 0     | 0.011  | 0     | 0.008  | 0     | 0.009 | 0     |
| 124 | AR0116  | 0.12   | 0     | 0.129  | 0     | 0.019  | 0     | 0.02   | 0     | 0.017  | 0     | 0.017 | 0     |
| 125 | AR0091  | 2.523  | 0     | 2.387  | 0     | 2.523  | 0     | 2.387  | 0     | 2.523  | 0     | 2.387 | 0     |
| 125 | AR0100  | 1.318  | 0     | 1.223  | 0     | 1.318  | 0     | 1.223  | 0     | 1.14   | 0     | 1.057 | 0     |
| 125 | AR0125  | 0.309  | 0     | 0.301  | 0     | 0.309  | 0     | 0.301  | 0     | 0.269  | 0     | 0.263 | 0     |
| 125 | UU7000  | 0      | 0     | 0      | 0     | 0      | 0     | 0      | 0     | 3.415  | 0     | 3.167 | 0     |
| 127 | FUROH   | 0      | 0     | 0      | 0     | 0      | 0     | 0      | 0     | 0.652  | 0.001 | 0.62  | 0     |
| 128 | 1U6000  | 0      | 0     | 0      | 0     | 0      | 0     | 0      | 0     | 0      | 0     | 0     | 0     |
| 129 | UD6000  | 0      | 0     | 0      | 0     | 0      | 0     | 0      | 0     | 0.473  | 0.007 | 0.445 | 0.001 |
| 130 | 3U5000  | 0.002  | 0     | 0.003  | 0     | 0.002  | 0     | 0.003  | 0     | 0.002  | 0     | 0.002 | 0     |
| 130 | 3U5001  | 0.002  | 0     | 0.003  | 0     | 0.002  | 0     | 0.003  | 0     | 0.002  | 0     | 0.002 | 0     |
| 130 | 3U5002  | 0.035  | 0     | 0.04   | 0     | 0.035  | 0     | 0.041  | 0     | 0.033  | 0     | 0.037 | 0     |
| 131 | AD5000  | 0      | 0     | 0      | 0     | 0.21   | 0.235 | 0.336  | 0.046 | 0.201  | 0.224 | 0.299 | 0.043 |
| 131 | DD5002  | 0.324  | 0.026 | 0.399  | 0.004 | 0.386  | 0.043 | 0.447  | 0.01  | 0.308  | 0.041 | 0.358 | 0.01  |
| 131 | DK5000  | 0      | 0     | 0      | 0     | 0.116  | 0.11  | 0.139  | 0.025 | 0.095  | 0.116 | 0.12  | 0.028 |
| 131 | GU5002  | 1.844  | 0     | 1.91   | 0     | 1.866  | 0     | 1.928  | 0     | 1.724  | 0     | 1.776 | 0     |
| 132 | 1D5000  | 0      | 0     | 0      | 0     | 0      | 0     | 0      | 0     | 0      | 0     | 0     | 0     |
| 132 | 1D5001  | 0      | 0     | 0      | 0     | 0      | 0     | 0      | 0     | 0      | 0     | 0     | 0     |
| 132 | 1D5003  | 0      | 0     | 0      | 0     | 0      | 0     | 0      | 0     | 0      | 0     | 0     | 0     |
| 132 | AR0020  | 0.004  | 0     | 0.005  | 0     | 0.004  | 0     | 0.005  | 0     | 0.002  | 0     | 0.002 | 0     |
| 132 | AR0133  | 0      | 0     | 0      | 0     | 0      | 0     | 0      | 0     | 0      | 0     | 0     | 0     |
| 132 | ED5000  | 4.438  | 0.001 | 4.683  | 0     | 4.481  | 0.001 | 4.622  | 0     | 1.578  | 0     | 1.593 | 0     |
| 133 | AD4001  | 0      | 0     | 0      | 0     | 0.008  | 0.369 | 0.013  | 0.569 | 0.011  | 0.363 | 0.013 | 0.51  |
| 133 | AR0039  | 0.12   | 0     | 0.132  | 0     | 0.119  | 0     | 0.129  | 0     | 0.059  | 0     | 0.064 | 0     |

|     |           |       |       |       |       |       |       |       |       |       |       |       |       |
|-----|-----------|-------|-------|-------|-------|-------|-------|-------|-------|-------|-------|-------|-------|
| 134 | 2D4000    | 1.793 | 0     | 1.875 | 0     | 1.831 | 0     | 1.916 | 0     | 1.796 | 0     | 1.878 | 0     |
| 134 | AR0035    | 0.042 | 0     | 0.055 | 0     | 0.042 | 0     | 0.053 | 0     | 0.008 | 0     | 0.01  | 0     |
| 134 | radED5002 | 0     | 0     | 0     | 0     | 0     | 0     | 0     | 0     | 0.009 | 0     | 0.011 | 0     |
| 135 | AR0048    | 0.354 | 4.449 | 1.491 | 2.234 | 0.323 | 4.499 | 1.146 | 2.838 | 0.055 | 0.626 | 0.158 | 0.41  |
| 135 | ED5002OOH | 0     | 0     | 0     | 0     | 0     | 0     | 0     | 0     | 0.672 | 0.007 | 0.717 | 0.002 |
| 138 | AR0120    | 0.005 | 0     | 0.006 | 0     | 0.005 | 0     | 0.006 | 0     | 0.005 | 0     | 0.006 | 0     |
| 138 | NTOL      | 0     | 0     | 0     | 0     | 0     | 0     | 0     | 0     | 3.092 | 0     | 3.131 | 0     |
| 139 | AR0042    | 0.066 | 0     | 0.075 | 0     | 0.067 | 0     | 0.075 | 0     | 0.067 | 0     | 0.075 | 0     |
| 139 | AR0131    | 0.259 | 0     | 0.279 | 0     | 0.259 | 0     | 0.279 | 0     | 0.259 | 0     | 0.279 | 0     |
| 139 | MBQN1OH   | 0     | 0     | 0     | 0     | 0.717 | 0.05  | 0.722 | 0.008 | 0.618 | 0.048 | 0.624 | 0.008 |
| 139 | Me6Cy1U3K | 0     | 0     | 0     | 0     | 0     | 0     | 0     | 0     | 0.025 | 0     | 0.026 | 0     |
| 140 | AR0027    | 2.271 | 0.031 | 2.449 | 0.006 | 2.277 | 0.024 | 2.45  | 0.004 | 2.284 | 0.018 | 2.451 | 0.003 |
| 140 | AR0129    | 0.104 | 0     | 0.138 | 0     | 0.016 | 0     | 0.021 | 0     | 0.014 | 0     | 0.018 | 0     |
| 140 | TOL2OH10  | 0     | 0     | 0     | 0     | 0.003 | 0     | 0.005 | 0     | 0.003 | 0     | 0.005 | 0     |
| 141 | AR0087    | 2.471 | 0.001 | 2.311 | 0     | 2.471 | 0     | 2.311 | 0     | 1.235 | 0     | 1.156 | 0     |
| 141 | AR0144    | 0.968 | 1.211 | 1.199 | 0.172 | 0.143 | 0.14  | 0.177 | 0.018 | 0.133 | 0.095 | 0.154 | 0.012 |
| 141 | TOL3OH    | 0     | 0     | 0     | 0     | 0.539 | 6.485 | 0.847 | 1.1   | 0.597 | 4.19  | 0.734 | 0.539 |
| 143 | AU6000    | 0     | 0     | 0     | 0     | 0     | 0     | 0     | 0     | 0.088 | 0.006 | 0.086 | 0.001 |
| 144 | 2U6000    | 0.001 | 0     | 0.001 | 0     | 0.001 | 0     | 0.001 | 0     | 0.001 | 0     | 0.001 | 0     |
| 147 | AK5000    | 0     | 0     | 0     | 0     | 0.009 | 0.377 | 0.017 | 0.576 | 0.012 | 0.369 | 0.016 | 0.515 |
| 148 | 2D5000    | 0.002 | 0     | 0.003 | 0     | 0.002 | 0     | 0.003 | 0     | 0.002 | 0     | 0.002 | 0     |
| 148 | 2D5001    | 0.002 | 0     | 0.003 | 0     | 0.002 | 0     | 0.003 | 0     | 0.002 | 0     | 0.002 | 0     |
| 148 | 2D5002    | 0     | 0     | 0     | 0     | 0     | 0     | 0     | 0     | 0     | 0     | 0     | 0     |
| 148 | 2D5003    | 0.007 | 0     | 0.008 | 0     | 0.008 | 0     | 0.009 | 0     | 0.007 | 0     | 0.008 | 0     |
| 148 | AR0080    | 0.394 | 0     | 0.405 | 0     | 0.405 | 0     | 0.418 | 0     | 0.358 | 0     | 0.37  | 0     |
| 148 | AR0121    | 0.043 | 0     | 0.056 | 0     | 0.043 | 0     | 0.054 | 0     | 0.017 | 0     | 0.02  | 0     |
| 149 | AA4000    | 0     | 0     | 0     | 0     | 0.002 | 0.109 | 0.003 | 0.167 | 0.003 | 0.11  | 0.003 | 0.156 |
| 149 | AR0134    | 0.383 | 5.482 | 1.821 | 3.089 | 0.352 | 5.569 | 1.378 | 3.804 | 0.128 | 1.829 | 0.434 | 1.298 |
| 149 | HD5000    | 0.099 | 0     | 0.093 | 0     | 0.099 | 0     | 0.093 | 0     | 0.076 | 0     | 0.071 | 0     |
| 149 | HD5001    | 0.045 | 0     | 0.042 | 0     | 0.045 | 0     | 0.042 | 0     | 0.035 | 0     | 0.032 | 0     |
| 153 | AR0126    | 0.001 | 0     | 0.001 | 0     | 0.001 | 0     | 0.001 | 0     | 0.001 | 0     | 0.001 | 0     |
| 154 | AR0090    | 1.083 | 0     | 1.078 | 0     | 1.083 | 0     | 1.078 | 0     | 1.083 | 0     | 1.078 | 0     |
| 154 | AR0113    | 2.086 | 0.063 | 2.212 | 0.01  | 2.103 | 0.041 | 2.215 | 0.006 | 1.84  | 0.024 | 1.929 | 0.004 |
| 155 | MBQN1K10H | 0.017 | 0.051 | 0.052 | 0.014 | 0.019 | 0.067 | 0.046 | 0.024 | 0.015 | 0.063 | 0.036 | 0.023 |
| 155 | MBQN2OH   | 0     | 0     | 0     | 0     | 0.031 | 0.712 | 0.162 | 0.881 | 0.033 | 0.699 | 0.124 | 0.82  |
| 156 | 3U7000    | 0     | 0     | 0     | 0     | 0     | 0     | 0     | 0     | 0.009 | 0     | 0.009 | 0     |
| 156 | AR014010  | 0     | 0     | 0     | 0     | 0     | 0     | 0     | 0     | 0     | 0     | 0     | 0     |
| 156 | TOL2OH20  | 0     | 0     | 0     | 0     | 0.002 | 0     | 0.004 | 0     | 0.002 | 0     | 0.004 | 0     |

|     |            |        |        |        |        |        |       |        |       |        |       |        |       |
|-----|------------|--------|--------|--------|--------|--------|-------|--------|-------|--------|-------|--------|-------|
| 156 | TOL3OH10   | 0      | 0      | 0      | 0      | 0.001  | 0     | 0.001  | 0     | 0.001  | 0     | 0.001  | 0     |
| 157 | AR0104     | 8.981  | 0.047  | 8.321  | 0.006  | 8.985  | 0.043 | 8.315  | 0.008 | 8.299  | 0.04  | 7.641  | 0.008 |
| 157 | AR0107     | 0.03   | 0      | 0.027  | 0      | 0.03   | 0     | 0.027  | 0     | 0.015  | 0     | 0.014  | 0     |
| 157 | TOL2OH0OH  | 0      | 0      | 0      | 0      | 0.007  | 0.119 | 0.013  | 0.184 | 0.008  | 0.117 | 0.013  | 0.154 |
| 157 | TOL4OH     | 0      | 0      | 0      | 0      | 0.137  | 4.321 | 0.215  | 6.767 | 0.166  | 4.063 | 0.209  | 5.678 |
| 157 | UD7000     | 0      | 0      | 0      | 0      | 0      | 0     | 0      | 0     | 0.229  | 0.541 | 0.335  | 0.124 |
| 158 | 1U7000     | 0      | 0      | 0      | 0      | 0      | 0     | 0      | 0     | 0      | 0     | 0      | 0     |
| 158 | AR0092     | 0      | 0      | 0      | 0      | 0      | 0     | 0      | 0     | 0      | 0     | 0      | 0     |
| 160 | AU50DN     | 0      | 0      | 0      | 0      | 0      | 0     | 0      | 0     | 0.071  | 0.019 | 0.234  | 0.008 |
| 162 | 1D6000     | 0      | 0      | 0      | 0      | 0      | 0     | 0      | 0     | 0      | 0     | 0      | 0     |
| 162 | radED5000  | 0      | 0      | 0      | 0      | 0      | 0     | 0      | 0     | 0.007  | 0     | 0.008  | 0     |
| 162 | radFURR6   | 0      | 0      | 0      | 0      | 0      | 0     | 0      | 0     | 0.001  | 0     | 0.001  | 0     |
| 163 | ED5000OH   | 0      | 0      | 0      | 0      | 0      | 0     | 0      | 0     | 0.224  | 0.025 | 0.266  | 0.005 |
| 163 | FURR6OH0OH | 0      | 0      | 0      | 0      | 0      | 0     | 0      | 0     | 0.004  | 0.065 | 0.004  | 0.076 |
| 170 | AR0128     | 2.222  | 23.614 | 9.946  | 14.275 | 0.367  | 2.453 | 1.477  | 1.098 | 0.448  | 1.949 | 1.442  | 0.712 |
| 171 | MBQN3OH    | 0      | 0      | 0      | 0      | 0.005  | 0.291 | 0.009  | 0.446 | 0.007  | 0.294 | 0.009  | 0.414 |
| 172 | AR0095     | 0.004  | 0      | 0.004  | 0      | 0.004  | 0     | 0.004  | 0     | 0.002  | 0     | 0.002  | 0     |
| 172 | AR0140     | 0.004  | 0      | 0.005  | 0      | 0.005  | 0     | 0.005  | 0     | 0.004  | 0     | 0.004  | 0     |
| 172 | TOL3OH2O   | 0      | 0      | 0      | 0      | 0.001  | 0     | 0.001  | 0     | 0.001  | 0     | 0.001  | 0     |
| 173 | AR0106     | 0.076  | 0      | 0.07   | 0      | 0.076  | 0     | 0.07   | 0     | 0.038  | 0     | 0.035  | 0     |
| 173 | AR0124     | 0.313  | 0.359  | 0.804  | 0.087  | 0.292  | 0.455 | 0.631  | 0.152 | 0.151  | 0.278 | 0.302  | 0.088 |
| 173 | AR0140OH   | 0.013  | 0.266  | 0.031  | 0.232  | 0.017  | 0.319 | 0.027  | 0.296 | 0.015  | 0.246 | 0.021  | 0.238 |
| 173 | AU7000     | 0      | 0      | 0      | 0      | 0      | 0     | 0      | 0     | 0.009  | 0.179 | 0.024  | 0.246 |
| 173 | TOL3OH0OH  | 0      | 0      | 0      | 0      | 0.002  | 0.043 | 0.003  | 0.069 | 0.003  | 0.044 | 0.003  | 0.064 |
| 173 | TOL5OH     | 0      | 0      | 0      | 0      | 0.038  | 1.64  | 0.06   | 2.567 | 0.051  | 1.609 | 0.063  | 2.296 |
| 174 | 2U7000     | 0      | 0      | 0      | 0      | 0      | 0     | 0      | 0     | 0.033  | 0     | 0.036  | 0     |
| 174 | AR0086     | 0.294  | 0      | 0.329  | 0      | 0.294  | 0     | 0.329  | 0     | 0.271  | 0     | 0.302  | 0     |
| 174 | AR0108     | 0      | 0      | 0      | 0      | 0      | 0     | 0      | 0     | 0      | 0     | 0      | 0     |
| 174 | AR0114     | 0      | 0      | 0      | 0      | 0      | 0     | 0      | 0     | 0      | 0     | 0      | 0     |
| 174 | BTOL2OH1O  | 0      | 0      | 0      | 0      | 0      | 0     | 0      | 0     | 0      | 0     | 0      | 0     |
| 175 | AR0094     | 7.65   | 1.666  | 7.014  | 0.159  | 7.646  | 1.439 | 7.007  | 0.163 | 7.069  | 1.252 | 6.437  | 0.142 |
| 176 | PU5000     | 2.936  | 0.001  | 3.052  | 0      | 2.936  | 0.001 | 3.052  | 0     | 2.216  | 0     | 2.303  | 0     |
| 176 | PU5001     | 1.384  | 0      | 1.357  | 0      | 1.384  | 0     | 1.357  | 0     | 1.054  | 0     | 1.033  | 0     |
| 176 | PU5002     | 25.823 | 0.014  | 26.398 | 0.003  | 26.133 | 0.01  | 26.643 | 0.002 | 24.131 | 0.009 | 24.549 | 0.002 |
| 178 | 1D6001     | 0      | 0      | 0      | 0      | 0      | 0     | 0      | 0     | 0      | 0     | 0      | 0     |
| 178 | 2D6001     | 0      | 0      | 0      | 0      | 0      | 0     | 0      | 0     | 0.002  | 0     | 0.002  | 0     |
| 178 | AR0038     | 1.715  | 0      | 1.931  | 0      | 1.706  | 0     | 1.889  | 0     | 0.85   | 0     | 0.94   | 0     |
| 180 | 2G5006     | 0.003  | 0      | 0.004  | 0      | 0.003  | 0     | 0.004  | 0     | 0.003  | 0     | 0.003  | 0     |

|     |            |       |       |       |       |       |       |       |       |       |       |       |       |
|-----|------------|-------|-------|-------|-------|-------|-------|-------|-------|-------|-------|-------|-------|
| 180 | 3H5000     | 0     | 0     | 0     | 0     | 0     | 0     | 0     | 0     | 0     | 0     | 0     | 0     |
| 180 | 3H5004     | 0     | 0     | 0     | 0     | 0     | 0     | 0     | 0     | 0     | 0     | 0     | 0     |
| 181 | GH5002     | 0.009 | 0.175 | 0.012 | 0.191 | 0.01  | 0.175 | 0.012 | 0.193 | 0.01  | 0.156 | 0.012 | 0.173 |
| 184 | AR0130     | 3.782 | 0     | 4.145 | 0     | 3.783 | 0     | 4.145 | 0     | 3.783 | 0     | 4.145 | 0     |
| 186 | TOL3OH1NO2 | 0     | 0     | 0     | 0     | 0.017 | 0.797 | 0.031 | 1.223 | 0.022 | 0.775 | 0.034 | 1.087 |
| 188 | C73K1OH2O  | 0.002 | 0     | 0.002 | 0     | 0.002 | 0     | 0.002 | 0     | 0.002 | 0     | 0.002 | 0     |
| 189 | C73K1OHOOH | 0.002 | 0.051 | 0.006 | 0.05  | 0.003 | 0.061 | 0.005 | 0.064 | 0.003 | 0.048 | 0.004 | 0.051 |
| 189 | HOM10      | 0     | 0     | 0     | 0     | 0     | 0     | 0     | 0     | 0.001 | 0.005 | 0.002 | 0.002 |
| 190 | 1D7000     | 0     | 0     | 0     | 0     | 0     | 0     | 0     | 0     | 0     | 0     | 0     | 0     |
| 190 | AR0096     | 0.03  | 0     | 0.033 | 0     | 0.03  | 0     | 0.033 | 0     | 0.015 | 0     | 0.017 | 0     |
| 190 | AR0099     | 0.022 | 0     | 0.032 | 0     | 0.021 | 0     | 0.024 | 0     | 0.018 | 0     | 0.021 | 0     |
| 190 | BTOL3OH1O  | 0     | 0     | 0     | 0     | 0     | 0     | 0     | 0     | 0     | 0     | 0     | 0     |
| 191 | AR0110     | 0.143 | 4.734 | 0.439 | 3.659 | 0.143 | 4.703 | 0.3   | 4.108 | 0.08  | 2.292 | 0.142 | 2.07  |
| 191 | AR0115     | 0.122 | 2.435 | 0.416 | 1.267 | 0.039 | 0.774 | 0.098 | 0.446 | 0.036 | 0.652 | 0.081 | 0.402 |
| 194 | 2D6000     | 0     | 0     | 0     | 0     | 0     | 0     | 0     | 0     | 0     | 0     | 0     | 0     |
| 196 | 3H5009     | 0     | 0     | 0     | 0     | 0     | 0     | 0     | 0     | 0     | 0     | 0     | 0     |
| 199 | AR0138     | 0.014 | 0.084 | 0.069 | 0.045 | 0.019 | 0.08  | 0.078 | 0.036 | 0.02  | 0.066 | 0.073 | 0.026 |
| 202 | TOL4OH1NO2 | 0     | 0     | 0     | 0     | 0.005 | 0.318 | 0.007 | 0.48  | 0.007 | 0.32  | 0.008 | 0.449 |
| 204 | AR0093     | 2.24  | 0.085 | 2.115 | 0.009 | 2.24  | 0.061 | 2.114 | 0.008 | 2.064 | 0.056 | 1.942 | 0.007 |
| 206 | 2D7000     | 0     | 0     | 0     | 0     | 0     | 0     | 0     | 0     | 0.002 | 0     | 0.004 | 0     |
| 206 | BTOL3OH2O  | 0     | 0     | 0     | 0     | 0.01  | 0     | 0.011 | 0     | 0.009 | 0     | 0.01  | 0     |
| 206 | BTOL4OH1O  | 0     | 0     | 0     | 0     | 0     | 0     | 0     | 0     | 0     | 0     | 0     | 0     |
| 206 | radHOM7O   | 0     | 0     | 0     | 0     | 0     | 0     | 0     | 0     | 0.001 | 0     | 0.002 | 0     |
| 207 | BTOL3OHOOH | 0     | 0     | 0     | 0     | 0.012 | 0.327 | 0.011 | 0.335 | 0.012 | 0.268 | 0.01  | 0.277 |
| 207 | HOM10OH    | 0     | 0     | 0     | 0     | 0     | 0     | 0     | 0     | 0     | 0     | 0     | 0     |
| 208 | PK5001     | 0.54  | 0.89  | 1.184 | 0.188 | 0.478 | 1.009 | 1.149 | 0.353 | 0.425 | 0.984 | 1.019 | 0.36  |
| 209 | 1P5006     | 0     | 0     | 0     | 0     | 0     | 0     | 0     | 0     | 0     | 0     | 0     | 0     |
| 217 | AR0141     | 0     | 0     | 0     | 0     | 0     | 0     | 0     | 0     | 0     | 0     | 0     | 0     |
| 218 | AR0105     | 0.973 | 0.009 | 0.923 | 0.001 | 0.973 | 0.006 | 0.922 | 0.001 | 0.487 | 0.003 | 0.461 | 0     |
| 219 | AR0118     | 0     | 0     | 0     | 0     | 0     | 0     | 0     | 0     | 0     | 0     | 0     | 0     |
| 220 | AR0109     | 0.09  | 1.175 | 0.378 | 0.456 | 0.086 | 1.173 | 0.311 | 0.589 | 0.04  | 0.59  | 0.144 | 0.325 |
| 221 | HOM2O      | 0     | 0     | 0     | 0     | 0     | 0     | 0     | 0     | 0.006 | 0.134 | 0.012 | 0.319 |
| 222 | BTOL4OH2O  | 0     | 0     | 0     | 0     | 0.005 | 0     | 0.009 | 0     | 0.005 | 0     | 0.008 | 0     |
| 222 | BTOL5OH1O  | 0     | 0     | 0     | 0     | 0     | 0     | 0     | 0     | 0     | 0     | 0     | 0     |
| 223 | BTOL4OHOOH | 0     | 0     | 0     | 0     | 0.006 | 0.149 | 0.008 | 0.233 | 0.007 | 0.142 | 0.008 | 0.197 |
| 224 | PD5002     | 0.007 | 0     | 0.007 | 0     | 0.007 | 0     | 0.007 | 0     | 0.007 | 0     | 0.007 | 0     |
| 224 | PK5003     | 0.016 | 0.385 | 0.015 | 0.326 | 0.017 | 0.388 | 0.013 | 0.33  | 0.019 | 0.353 | 0.014 | 0.301 |
| 225 | 1P500A     | 0     | 0     | 0     | 0     | 0     | 0     | 0     | 0     | 0     | 0     | 0     | 0     |

|     |            |       |       |       |       |       |       |       |       |       |       |       |       |
|-----|------------|-------|-------|-------|-------|-------|-------|-------|-------|-------|-------|-------|-------|
| 225 | 2P5000     | 0     | 0     | 0     | 0     | 0     | 0     | 0     | 0     | 0     | 0     | 0     | 0     |
| 225 | 2P5006     | 0.037 | 0     | 0.045 | 0     | 0.038 | 0     | 0.046 | 0     | 0.035 | 0     | 0.042 | 0     |
| 225 | 3P400X     | 0     | 0     | 0     | 0     | 0     | 0     | 0     | 0     | 0     | 0     | 0     | 0     |
| 226 | PH5000     | 0.001 | 0.015 | 0.002 | 0.016 | 0.001 | 0.015 | 0.002 | 0.016 | 0.001 | 0.011 | 0.001 | 0.012 |
| 226 | PH5002     | 0.145 | 2.211 | 0.405 | 1.767 | 0.162 | 2.182 | 0.452 | 1.602 | 0.165 | 1.945 | 0.409 | 1.487 |
| 227 | 3P4000     | 0.001 | 0     | 0.001 | 0     | 0.001 | 0     | 0.001 | 0     | 0.001 | 0     | 0.001 | 0     |
| 235 | AR0101     | 0.003 | 0     | 0.003 | 0     | 0.003 | 0     | 0.003 | 0     | 0.003 | 0     | 0.003 | 0     |
| 235 | AR0152     | 0     | 0     | 0     | 0     | 0     | 0     | 0     | 0     | 0     | 0     | 0     | 0     |
| 236 | AR0119     | 0.051 | 0     | 0.047 | 0     | 0.051 | 0     | 0.047 | 0     | 0.047 | 0     | 0.044 | 0     |
| 236 | HOM1ONO2   | 0     | 0     | 0     | 0     | 0     | 0     | 0     | 0     | 0     | 0.002 | 0     | 0.004 |
| 238 | BTOL5OH2O  | 0     | 0     | 0     | 0     | 0.001 | 0     | 0.002 | 0     | 0.002 | 0     | 0.002 | 0     |
| 238 | radHOM90   | 0     | 0     | 0     | 0     | 0     | 0     | 0     | 0     | 0.017 | 0     | 0.038 | 0     |
| 239 | BTOL5OHOOH | 0     | 0     | 0     | 0     | 0.002 | 0.055 | 0.002 | 0.085 | 0.002 | 0.054 | 0.003 | 0.077 |
| 239 | HOM2OOH    | 0     | 0     | 0     | 0     | 0     | 0     | 0     | 0     | 0     | 0     | 0     | 0     |
| 241 | 2P500A     | 0.009 | 0     | 0.01  | 0     | 0.009 | 0     | 0.01  | 0     | 0.008 | 0     | 0.01  | 0     |
| 242 | PH5004     | 0.033 | 0.634 | 0.034 | 0.676 | 0.035 | 0.636 | 0.033 | 0.685 | 0.038 | 0.57  | 0.035 | 0.616 |
| 251 | AR0142     | 0.004 | 0     | 0.021 | 0     | 0.001 | 0     | 0.003 | 0     | 0.001 | 0     | 0.003 | 0     |
| 252 | AR0153     | 0.019 | 0.601 | 0.09  | 1.758 | 0.003 | 0.074 | 0.013 | 0.225 | 0.005 | 0.08  | 0.014 | 0.214 |
| 268 | HOM2ONO2   | 0     | 0     | 0     | 0     | 0     | 0     | 0     | 0     | 0.002 | 0.044 | 0.004 | 0.104 |
| 271 | PP4004     | 0.003 | 0.058 | 0.022 | 0.062 | 0.004 | 0.061 | 0.019 | 0.064 | 0.004 | 0.062 | 0.016 | 0.067 |
| 273 | PP4000     | 0.029 | 0.615 | 0.038 | 0.75  | 0.031 | 0.617 | 0.036 | 0.762 | 0.033 | 0.556 | 0.036 | 0.689 |

**Table S11.1: Final concentrations of simulated secondary species at 280K - partitioning test section ( $\mu\text{g}/\text{m}^3$ )**

|     |           | 280 K  |       |        |       |        |       |        |       |        |       |        |       |
|-----|-----------|--------|-------|--------|-------|--------|-------|--------|-------|--------|-------|--------|-------|
|     |           | T1     |       | T2     |       | T3     |       | T4     |       | T5     |       | T6     |       |
| m/z | species   | gas    | part. |
| 31  | CH2O      | 4.38   | 0     | 4.366  | 0     | 4.326  | 0     | 4.348  | 0     | 4.341  | 0     | 4.341  | 0     |
| 45  | D02000    | 4.271  | 0     | 4.271  | 0     | 4.271  | 0     | 4.271  | 0     | 4.271  | 0     | 4.271  | 0     |
| 59  | DD2000    | 31.264 | 0     | 31.187 | 0     | 30.804 | 0     | 31.183 | 0     | 30.593 | 0     | 30.591 | 0     |
| 61  | A02000    | 0.526  | 0     | 0.526  | 0     | 0.526  | 0     | 0.526  | 0     | 0.526  | 0     | 0.526  | 0     |
| 73  | DK3000    | 8.277  | 0     | 8.119  | 0     | 8.098  | 0     | 8.19   | 0     | 8.156  | 0     | 7.516  | 0.496 |
| 75  | AD2000    | 0.946  | 0     | 0.739  | 0     | 0.711  | 0     | 0.844  | 0     | 0.79   | 0     | 0.788  | 0     |
| 76  | 3K2000    | 0.019  | 0     | 0.019  | 0     | 0.018  | 0     | 0.019  | 0     | 0.018  | 0     | 0.018  | 0     |
| 76  | radED4001 | 0.003  | 0     | 0.003  | 0     | 0.003  | 0     | 0.003  | 0     | 0.003  | 0     | 0.003  | 0     |
| 77  | HD2000    | 0.07   | 0     | 0.068  | 0     | 0.062  | 0     | 0.064  | 0     | 0.064  | 0     | 0.064  | 0     |
| 85  | FURON     | 0.668  | 0     | 0.668  | 0     | 0.668  | 0     | 0.668  | 0     | 0.668  | 0     | 0.668  | 0     |
| 85  | UD4000    | 1.532  | 0     | 1.532  | 0     | 1.528  | 0     | 1.529  | 0     | 1.529  | 0     | 1.529  | 0     |
| 87  | DD3001    | 0.433  | 0     | 0.397  | 0     | 0.359  | 0     | 0.42   | 0     | 0.405  | 0     | 0.405  | 0     |
| 89  | AK3000    | 0.923  | 0     | 0.747  | 0     | 0.681  | 0     | 0.802  | 0     | 0.775  | 0     | 0.774  | 0     |
| 89  | DD3000    | 1.14   | 0     | 1.13   | 0.001 | 1.102  | 0.017 | 1.126  | 0.005 | 1.118  | 0.004 | 1.118  | 0.004 |
| 91  | AA2000    | 0.764  | 0     | 0.475  | 0.015 | 0.535  | 0.002 | 0.651  | 0.004 | 0.613  | 0.006 | 0.611  | 0.005 |
| 93  | TOL       | 245.9  | 0     | 245.9  | 0     | 245.9  | 0     | 245.9  | 0     | 245.9  | 0     | 245.9  | 0     |
| 94  | AR0013    | 0.015  | 0     | 0.015  | 0     | 0.015  | 0     | 0.015  | 0     | 0.015  | 0     | 0.015  | 0     |
| 97  | FURR3     | 0.382  | 0     | 0.382  | 0     | 0.382  | 0     | 0.382  | 0     | 0.382  | 0     | 0.382  | 0     |
| 99  | MALAHY    | 4.541  | 0.004 | 4.542  | 0     | 4.535  | 0     | 4.54   | 0     | 4.41   | 0     | 4.41   | 0     |
| 99  | MFUR      | 0.931  | 0     | 0.93   | 0     | 0.928  | 0     | 0.929  | 0     | 0.929  | 0     | 0.929  | 0     |
| 99  | UD5000    | 2.271  | 0     | 2.268  | 0     | 2.257  | 0     | 2.261  | 0     | 2.26   | 0     | 2.26   | 0     |
| 99  | UD5001    | 1.345  | 0     | 1.345  | 0     | 1.345  | 0     | 1.345  | 0     | 1.345  | 0     | 1.345  | 0     |
| 101 | AR0010    | 0.993  | 0     | 0.851  | 0     | 0.641  | 0     | 0.807  | 0     | 0.764  | 0     | 0.763  | 0     |
| 101 | AU4000    | 0.299  | 0     | 0.275  | 0.001 | 0.236  | 0.004 | 0.268  | 0.002 | 0.257  | 0.001 | 0.257  | 0.001 |
| 101 | DK4001    | 0.101  | 0     | 0.084  | 0     | 0.05   | 0     | 0.083  | 0     | 0.075  | 0     | 0.075  | 0     |
| 102 | 1D4000    | 0      | 0     | 0      | 0     | 0      | 0     | 0      | 0     | 0      | 0     | 0      | 0     |
| 102 | 1D4001    | 0      | 0     | 0      | 0     | 0      | 0     | 0      | 0     | 0      | 0     | 0      | 0     |
| 103 | DK4000    | 0.731  | 0     | 0.713  | 0     | 0.673  | 0.002 | 0.708  | 0     | 0.693  | 0     | 0.693  | 0     |
| 107 | AR0102    | 6.519  | 0     | 6.52   | 0     | 6.52   | 0     | 6.52   | 0     | 6.519  | 0     | 6.519  | 0     |
| 108 | AR0089    | 0      | 0     | 0      | 0     | 0      | 0     | 0      | 0     | 0      | 0     | 0      | 0     |
| 108 | AR0098    | 0.01   | 0     | 0.01   | 0     | 0.01   | 0     | 0.01   | 0     | 0.01   | 0     | 0.01   | 0     |
| 109 | AR0088    | 6.956  | 0     | 6.956  | 0     | 6.956  | 0     | 6.956  | 0     | 6.956  | 0     | 6.956  | 0     |
| 110 | AR0028    | 0.025  | 0     | 0.025  | 0     | 0.025  | 0     | 0.025  | 0     | 0.025  | 0     | 0.025  | 0     |



|     |         |        |       |        |       |        |       |        |       |        |       |        |       |
|-----|---------|--------|-------|--------|-------|--------|-------|--------|-------|--------|-------|--------|-------|
| 111 | AR0043  | 0.085  | 0     | 0.085  | 0     | 0.085  | 0     | 0.085  | 0     | 0.085  | 0     | 0.085  | 0     |
| 111 | FURR5   | 0.777  | 0     | 0.777  | 0     | 0.777  | 0     | 0.777  | 0     | 0.777  | 0     | 0.777  | 0     |
| 113 | FURR6   | 2.835  | 0.004 | 2.829  | 0.001 | 2.688  | 0.136 | 2.816  | 0.017 | 2.692  | 0.011 | 2.692  | 0.011 |
| 115 | AU5000  | 0.316  | 0.001 | 0.247  | 0.001 | 0.262  | 0.011 | 0.29   | 0.005 | 0.272  | 0.004 | 0.271  | 0.004 |
| 115 | AU5002  | 1.06   | 0     | 1.056  | 0     | 1.001  | 0.002 | 1.03   | 0.001 | 1.015  | 0     | 1.014  | 0.001 |
| 115 | UD5002  | 0.139  | 0     | 0.139  | 0     | 0.127  | 0.001 | 0.131  | 0     | 0.13   | 0     | 0.13   | 0     |
| 117 | AD4000  | 0.167  | 0.008 | 0.117  | 0.105 | 0.069  | 0.2   | 0.1    | 0.127 | 0.064  | 0.083 | 0.065  | 0.082 |
| 117 | AR0040  | 0.054  | 0     | 0.049  | 0     | 0.042  | 0     | 0.051  | 0     | 0.049  | 0     | 0.049  | 0     |
| 117 | ED4001  | 0.753  | 0     | 0.725  | 0     | 0.636  | 0     | 0.66   | 0     | 0.653  | 0     | 0.653  | 0     |
| 122 | P02000  | 21.689 | 0     | 21.359 | 0     | 20.833 | 0     | 21.402 | 0     | 21.048 | 0     | 20.691 | 0     |
| 123 | AR0127  | 0.826  | 0     | 0.825  | 0     | 0.766  | 0     | 0.79   | 0     | 0.785  | 0     | 0.785  | 0     |
| 123 | AR0132  | 0.104  | 0     | 0.104  | 0     | 0.103  | 0     | 0.104  | 0     | 0.103  | 0     | 0.103  | 0     |
| 123 | BZALDOH | 1.068  | 0     | 1.068  | 0     | 1.068  | 0.001 | 1.068  | 0     | 1.068  | 0     | 1.068  | 0     |
| 124 | AR0085  | 0.023  | 0     | 0.023  | 0     | 0.023  | 0     | 0.023  | 0     | 0.023  | 0     | 0.023  | 0     |
| 124 | AR0112  | 0.008  | 0     | 0.008  | 0     | 0.008  | 0     | 0.008  | 0     | 0.008  | 0     | 0.008  | 0     |
| 124 | AR0116  | 0.018  | 0     | 0.018  | 0     | 0.017  | 0     | 0.018  | 0     | 0.017  | 0     | 0.017  | 0     |
| 125 | AR0091  | 2.523  | 0     | 2.523  | 0     | 2.523  | 0     | 2.523  | 0     | 2.523  | 0     | 2.523  | 0     |
| 125 | AR0100  | 1.14   | 0     | 1.14   | 0     | 1.14   | 0     | 1.14   | 0     | 1.14   | 0     | 1.14   | 0     |
| 125 | AR0125  | 0.269  | 0     | 0.269  | 0     | 0.269  | 0     | 0.269  | 0     | 0.269  | 0     | 0.269  | 0     |
| 125 | UU7000  | 3.415  | 0     | 3.415  | 0     | 3.415  | 0     | 3.415  | 0     | 3.415  | 0     | 3.415  | 0     |
| 127 | FUROH   | 0.652  | 0     | 0.652  | 0     | 0.652  | 0.001 | 0.652  | 0     | 0.652  | 0     | 0.652  | 0     |
| 128 | 1U6000  | 0      | 0     | 0      | 0     | 0      | 0     | 0      | 0     | 0      | 0     | 0      | 0     |
| 129 | UD6000  | 0.474  | 0     | 0.474  | 0     | 0.473  | 0.007 | 0.473  | 0.001 | 0.473  | 0.001 | 0.473  | 0.001 |
| 130 | 3U5000  | 0.002  | 0     | 0.002  | 0     | 0.002  | 0     | 0.002  | 0     | 0.002  | 0     | 0.002  | 0     |
| 130 | 3U5001  | 0.002  | 0     | 0.002  | 0     | 0.002  | 0     | 0.002  | 0     | 0.002  | 0     | 0.002  | 0     |
| 130 | 3U5002  | 0.033  | 0     | 0.033  | 0     | 0.033  | 0     | 0.033  | 0     | 0.032  | 0     | 0.032  | 0     |
| 131 | AD5000  | 0.395  | 0.007 | 0.222  | 0.054 | 0.201  | 0.224 | 0.277  | 0.141 | 0.19   | 0.102 | 0.191  | 0.1   |
| 131 | DD5002  | 0.37   | 0     | 0.357  | 0.001 | 0.308  | 0.041 | 0.344  | 0.007 | 0.34   | 0.005 | 0.34   | 0.005 |
| 131 | DK5000  | 0.142  | 0.001 | 0.132  | 0.007 | 0.095  | 0.116 | 0.122  | 0.027 | 0.114  | 0.02  | 0.114  | 0.02  |
| 131 | GU5002  | 1.751  | 0     | 1.751  | 0     | 1.724  | 0     | 1.748  | 0     | 1.703  | 0     | 1.703  | 0     |
| 132 | 1D5000  | 0      | 0     | 0      | 0     | 0      | 0     | 0      | 0     | 0      | 0     | 0      | 0     |
| 132 | 1D5001  | 0      | 0     | 0      | 0     | 0      | 0     | 0      | 0     | 0      | 0     | 0      | 0     |
| 132 | 1D5003  | 0      | 0     | 0      | 0     | 0      | 0     | 0      | 0     | 0      | 0     | 0      | 0     |
| 132 | AR0020  | 0.003  | 0     | 0.002  | 0     | 0.002  | 0     | 0.002  | 0     | 0.002  | 0     | 0.002  | 0     |
| 132 | AR0133  | 0      | 0     | 0      | 0     | 0      | 0     | 0      | 0     | 0      | 0     | 0      | 0     |
| 132 | ED5000  | 1.871  | 0     | 1.813  | 0     | 1.578  | 0     | 1.646  | 0     | 1.625  | 0     | 1.624  | 0     |
| 133 | AD4001  | 0.238  | 0.134 | 0.008  | 0.294 | 0.011  | 0.363 | 0.016  | 0.495 | 0.014  | 0.394 | 0.014  | 0.393 |
| 133 | AR0039  | 0.081  | 0     | 0.072  | 0     | 0.059  | 0     | 0.074  | 0     | 0.07   | 0     | 0.07   | 0     |

|     |           |       |       |       |       |       |       |       |       |       |       |       |       |
|-----|-----------|-------|-------|-------|-------|-------|-------|-------|-------|-------|-------|-------|-------|
| 134 | 2D4000    | 1.797 | 0     | 1.797 | 0     | 1.796 | 0     | 1.797 | 0     | 1.796 | 0     | 1.796 | 0     |
| 134 | AR0035    | 0.01  | 0     | 0.01  | 0     | 0.008 | 0     | 0.009 | 0     | 0.009 | 0     | 0.009 | 0     |
| 134 | radED5002 | 0.011 | 0     | 0.01  | 0     | 0.009 | 0     | 0.009 | 0     | 0.009 | 0     | 0.009 | 0     |
| 135 | AR0048    | 0.372 | 0.065 | 0.33  | 0.172 | 0.055 | 0.626 | 0.113 | 0.504 | 0.094 | 0.384 | 0.094 | 0.385 |
| 135 | ED5002OOH | 0.753 | 0     | 0.734 | 0     | 0.672 | 0.007 | 0.71  | 0.001 | 0.7   | 0.001 | 0.7   | 0.001 |
| 138 | AR0120    | 0.005 | 0     | 0.005 | 0     | 0.005 | 0     | 0.005 | 0     | 0.005 | 0     | 0.005 | 0     |
| 138 | NTOL      | 3.092 | 0     | 3.093 | 0     | 3.092 | 0     | 3.093 | 0     | 3.092 | 0     | 3.092 | 0     |
| 139 | AR0042    | 0.067 | 0     | 0.067 | 0     | 0.067 | 0     | 0.067 | 0     | 0.067 | 0     | 0.067 | 0     |
| 139 | AR0131    | 0.259 | 0     | 0.259 | 0     | 0.259 | 0     | 0.259 | 0     | 0.259 | 0     | 0.259 | 0     |
| 139 | MBQN10H   | 0.643 | 0     | 0.643 | 0     | 0.618 | 0.048 | 0.641 | 0.003 | 0.637 | 0.002 | 0.637 | 0.002 |
| 139 | Me6Cy1U3K | 0.027 | 0     | 0.027 | 0     | 0.025 | 0     | 0.026 | 0     | 0.026 | 0     | 0.026 | 0     |
| 140 | AR0027    | 2.3   | 0.001 | 2.3   | 0     | 2.284 | 0.018 | 2.299 | 0.001 | 2.294 | 0.001 | 2.294 | 0.001 |
| 140 | AR0129    | 0.016 | 0     | 0.016 | 0     | 0.014 | 0     | 0.016 | 0     | 0.015 | 0     | 0.015 | 0     |
| 140 | TOL20H10  | 0.006 | 0     | 0.002 | 0     | 0.003 | 0     | 0.004 | 0     | 0.004 | 0     | 0.004 | 0     |
| 141 | AR0087    | 1.235 | 0     | 1.235 | 0     | 1.235 | 0     | 1.235 | 0     | 1.235 | 0     | 1.235 | 0     |
| 141 | AR0144    | 0.165 | 0.004 | 0.165 | 0.008 | 0.133 | 0.095 | 0.164 | 0.008 | 0.139 | 0.004 | 0.139 | 0.005 |
| 141 | TOL30H    | 0.782 | 0.028 | 0.31  | 6.631 | 0.597 | 4.19  | 0.756 | 0.574 | 0.68  | 0.371 | 0.676 | 0.415 |
| 143 | AU6000    | 0.09  | 0.001 | 0.091 | 0     | 0.088 | 0.006 | 0.091 | 0.001 | 0.072 | 0.001 | 0.072 | 0.001 |
| 144 | 2U6000    | 0.001 | 0     | 0.001 | 0     | 0.001 | 0     | 0.001 | 0     | 0.001 | 0     | 0.001 | 0     |
| 147 | AK5000    | 0.178 | 0.094 | 0.008 | 0.295 | 0.012 | 0.369 | 0.018 | 0.47  | 0.016 | 0.362 | 0.015 | 0.361 |
| 148 | 2D5000    | 0.002 | 0     | 0.002 | 0     | 0.002 | 0     | 0.002 | 0     | 0.002 | 0     | 0.002 | 0     |
| 148 | 2D5001    | 0.002 | 0     | 0.002 | 0     | 0.002 | 0     | 0.002 | 0     | 0.002 | 0     | 0.002 | 0     |
| 148 | 2D5002    | 0     | 0     | 0     | 0     | 0     | 0     | 0     | 0     | 0     | 0     | 0     | 0     |
| 148 | 2D5003    | 0.007 | 0     | 0.007 | 0     | 0.007 | 0     | 0.007 | 0     | 0.007 | 0     | 0.007 | 0     |
| 148 | AR0080    | 0.358 | 0     | 0.358 | 0     | 0.358 | 0     | 0.358 | 0     | 0.352 | 0     | 0.352 | 0     |
| 148 | AR0121    | 0.021 | 0     | 0.021 | 0     | 0.017 | 0     | 0.018 | 0     | 0.017 | 0     | 0.017 | 0     |
| 149 | AA4000    | 0.111 | 0.06  | 0.002 | 0.095 | 0.003 | 0.11  | 0.004 | 0.177 | 0.004 | 0.141 | 0.004 | 0.14  |
| 149 | AR0134    | 1.097 | 0.214 | 1.024 | 0.431 | 0.128 | 1.829 | 0.29  | 1.448 | 0.224 | 1.011 | 0.225 | 1.017 |
| 149 | HD5000    | 0.076 | 0     | 0.076 | 0     | 0.076 | 0     | 0.076 | 0     | 0.076 | 0     | 0.076 | 0     |
| 149 | HD5001    | 0.035 | 0     | 0.035 | 0     | 0.035 | 0     | 0.035 | 0     | 0.035 | 0     | 0.035 | 0     |
| 153 | AR0126    | 0.001 | 0     | 0.001 | 0     | 0.001 | 0     | 0.001 | 0     | 0.001 | 0     | 0.001 | 0     |
| 154 | AR0090    | 1.083 | 0     | 1.083 | 0     | 1.083 | 0     | 1.083 | 0     | 1.083 | 0     | 1.083 | 0     |
| 154 | AR0113    | 1.858 | 0.002 | 1.86  | 0     | 1.84  | 0.024 | 1.858 | 0.002 | 1.835 | 0.001 | 1.835 | 0.001 |
| 155 | MBQN1K10H | 0.1   | 0.002 | 0.067 | 0.003 | 0.015 | 0.063 | 0.042 | 0.014 | 0.034 | 0.008 | 0.034 | 0.008 |
| 155 | MBQN20H   | 0.507 | 0.055 | 0.25  | 0.107 | 0.033 | 0.699 | 0.144 | 0.593 | 0.11  | 0.304 | 0.109 | 0.307 |
| 156 | 3U7000    | 0.009 | 0     | 0.009 | 0     | 0.009 | 0     | 0.009 | 0     | 0.009 | 0     | 0.009 | 0     |
| 156 | AR014010  | 0     | 0     | 0     | 0     | 0     | 0     | 0     | 0     | 0     | 0     | 0     | 0     |
| 156 | TOL20H20  | 0.005 | 0     | 0.001 | 0     | 0.002 | 0     | 0.003 | 0     | 0.003 | 0     | 0.003 | 0     |

|     |            |        |       |        |       |        |       |        |       |        |       |        |       |
|-----|------------|--------|-------|--------|-------|--------|-------|--------|-------|--------|-------|--------|-------|
| 156 | TOL3OH10   | 0.004  | 0     | 0.001  | 0     | 0.001  | 0     | 0.001  | 0     | 0.001  | 0     | 0.001  | 0     |
| 157 | AR0104     | 8.421  | 0     | 8.432  | 0     | 8.299  | 0.04  | 8.4    | 0.003 | 8.054  | 0.002 | 8.053  | 0.002 |
| 157 | AR0107     | 0.015  | 0     | 0.015  | 0     | 0.015  | 0     | 0.015  | 0     | 0.015  | 0     | 0.015  | 0     |
| 157 | TOL2OH00H  | 0.049  | 0.02  | 0.006  | 0.081 | 0.008  | 0.117 | 0.014  | 0.123 | 0.013  | 0.091 | 0.013  | 0.092 |
| 157 | TOL4OH     | 0.559  | 0.28  | 0.106  | 2.941 | 0.166  | 4.063 | 0.234  | 4.042 | 0.21   | 3.188 | 0.207  | 3.216 |
| 157 | UD7000     | 0.379  | 0.004 | 0.38   | 0.012 | 0.229  | 0.541 | 0.345  | 0.076 | 0.296  | 0.046 | 0.296  | 0.046 |
| 158 | 1U7000     | 0      | 0     | 0      | 0     | 0      | 0     | 0      | 0     | 0      | 0     | 0      | 0     |
| 158 | AR0092     | 0      | 0     | 0      | 0     | 0      | 0     | 0      | 0     | 0      | 0     | 0      | 0     |
| 160 | AU50DN     | 0.262  | 0.008 | 0.16   | 0.003 | 0.071  | 0.019 | 0.217  | 0.015 | 0.09   | 0.006 | 0.089  | 0.006 |
| 162 | 1D6000     | 0      | 0     | 0      | 0     | 0      | 0     | 0      | 0     | 0      | 0     | 0      | 0     |
| 162 | radED5000  | 0.008  | 0     | 0.008  | 0     | 0.007  | 0     | 0.007  | 0     | 0.007  | 0     | 0.007  | 0     |
| 162 | radFURR6   | 0.001  | 0     | 0.001  | 0     | 0.001  | 0     | 0.001  | 0     | 0.001  | 0     | 0.001  | 0     |
| 163 | ED500000H  | 0.275  | 0     | 0.267  | 0     | 0.224  | 0.025 | 0.253  | 0.007 | 0.249  | 0.007 | 0.248  | 0.007 |
| 163 | FURR6OHO0H | 0.041  | 0.018 | 0.005  | 0.066 | 0.004  | 0.065 | 0.005  | 0.066 | 0.005  | 0.055 | 0.005  | 0.056 |
| 170 | AR0128     | 1.736  | 0.171 | 1.099  | 1.124 | 0.448  | 1.949 | 1.408  | 0.599 | 0.787  | 0.234 | 0.777  | 0.254 |
| 171 | MBQN3OH    | 0.298  | 0.15  | 0.007  | 0.251 | 0.007  | 0.294 | 0.012  | 0.423 | 0.011  | 0.288 | 0.011  | 0.288 |
| 172 | AR0095     | 0.002  | 0     | 0.002  | 0     | 0.002  | 0     | 0.002  | 0     | 0.002  | 0     | 0.002  | 0     |
| 172 | AR0140     | 0.004  | 0     | 0.004  | 0     | 0.004  | 0     | 0.004  | 0     | 0.004  | 0     | 0.004  | 0     |
| 172 | TOL3OH20   | 0.004  | 0     | 0      | 0     | 0.001  | 0     | 0.001  | 0     | 0.001  | 0     | 0.001  | 0     |
| 173 | AR0106     | 0.038  | 0     | 0.038  | 0     | 0.038  | 0     | 0.038  | 0     | 0.038  | 0     | 0.038  | 0     |
| 173 | AR0124     | 0.858  | 0.005 | 0.618  | 0.019 | 0.151  | 0.278 | 0.362  | 0.062 | 0.29   | 0.038 | 0.289  | 0.037 |
| 173 | AR014000H  | 0.055  | 0.019 | 0.041  | 0.15  | 0.015  | 0.246 | 0.023  | 0.179 | 0.022  | 0.138 | 0.022  | 0.14  |
| 173 | AU7000     | 0.084  | 0.04  | 0.035  | 0.236 | 0.009  | 0.179 | 0.021  | 0.212 | 0.018  | 0.14  | 0.017  | 0.143 |
| 173 | TOL3OH00H  | 0.037  | 0.016 | 0.002  | 0.034 | 0.003  | 0.044 | 0.004  | 0.063 | 0.004  | 0.05  | 0.004  | 0.05  |
| 173 | TOL5OH     | 0.417  | 0.221 | 0.037  | 1.281 | 0.051  | 1.609 | 0.078  | 2.339 | 0.07   | 1.942 | 0.068  | 1.933 |
| 174 | 2U7000     | 0.033  | 0     | 0.033  | 0     | 0.033  | 0     | 0.033  | 0     | 0.033  | 0     | 0.033  | 0     |
| 174 | AR0086     | 0.271  | 0     | 0.271  | 0     | 0.271  | 0     | 0.271  | 0     | 0.271  | 0     | 0.271  | 0     |
| 174 | AR0108     | 0      | 0     | 0      | 0     | 0      | 0     | 0      | 0     | 0      | 0     | 0      | 0     |
| 174 | AR0114     | 0      | 0     | 0      | 0     | 0      | 0     | 0      | 0     | 0      | 0     | 0      | 0     |
| 174 | BTOL2OH10  | 0      | 0     | 0      | 0     | 0      | 0     | 0      | 0     | 0      | 0     | 0      | 0     |
| 175 | AR0094     | 7.15   | 0.049 | 7.179  | 0.006 | 7.069  | 1.252 | 7.15   | 0.141 | 6.759  | 0.101 | 6.759  | 0.105 |
| 176 | PU5000     | 2.216  | 0     | 2.216  | 0     | 2.216  | 0     | 2.216  | 0     | 2.216  | 0     | 2.216  | 0     |
| 176 | PU5001     | 1.054  | 0     | 1.054  | 0     | 1.054  | 0     | 1.054  | 0     | 1.054  | 0     | 1.054  | 0     |
| 176 | PU5002     | 24.524 | 0     | 24.525 | 0     | 24.131 | 0.009 | 24.486 | 0.001 | 23.868 | 0.001 | 23.867 | 0.001 |
| 178 | 1D6001     | 0      | 0     | 0      | 0     | 0      | 0     | 0      | 0     | 0      | 0     | 0      | 0     |
| 178 | 2D6001     | 0.002  | 0     | 0.002  | 0     | 0.002  | 0     | 0.002  | 0     | 0.002  | 0     | 0.002  | 0     |
| 178 | AR0038     | 1.146  | 0     | 1.014  | 0     | 0.85   | 0     | 1.051  | 0     | 1.002  | 0     | 1      | 0     |
| 180 | 2G5006     | 0.003  | 0     | 0.003  | 0     | 0.003  | 0     | 0.003  | 0     | 0.003  | 0     | 0.003  | 0     |

|     |            |       |       |       |       |       |       |       |       |       |       |       |       |
|-----|------------|-------|-------|-------|-------|-------|-------|-------|-------|-------|-------|-------|-------|
| 180 | 3H5000     | 0     | 0     | 0     | 0     | 0     | 0     | 0     | 0     | 0     | 0     | 0     | 0     |
| 180 | 3H5004     | 0     | 0     | 0     | 0     | 0     | 0     | 0     | 0     | 0     | 0     | 0     | 0     |
| 181 | GH5002     | 0.047 | 0.021 | 0.025 | 0.117 | 0.01  | 0.156 | 0.012 | 0.144 | 0.012 | 0.122 | 0.011 | 0.123 |
| 184 | AR0130     | 3.783 | 0     | 3.783 | 0     | 3.783 | 0     | 3.783 | 0     | 3.783 | 0     | 3.783 | 0     |
| 186 | TOL3OH1NO2 | 0.679 | 0.323 | 0.016 | 0.633 | 0.022 | 0.775 | 0.037 | 1.015 | 0.033 | 0.71  | 0.032 | 0.713 |
| 188 | C73K1OH2O  | 0.002 | 0     | 0.002 | 0     | 0.002 | 0     | 0.002 | 0     | 0.002 | 0     | 0.002 | 0     |
| 189 | C73K1OHOOH | 0.014 | 0.004 | 0.008 | 0.034 | 0.003 | 0.048 | 0.004 | 0.039 | 0.004 | 0.031 | 0.004 | 0.032 |
| 189 | HOM10      | 0.001 | 0     | 0.001 | 0     | 0.001 | 0.005 | 0.001 | 0.001 | 0.001 | 0     | 0.001 | 0     |
| 190 | 1D7000     | 0     | 0     | 0     | 0     | 0     | 0     | 0     | 0     | 0     | 0     | 0     | 0     |
| 190 | AR0096     | 0.015 | 0     | 0.015 | 0     | 0.015 | 0     | 0.015 | 0     | 0.015 | 0     | 0.015 | 0     |
| 190 | AR0099     | 0.02  | 0     | 0.02  | 0     | 0.018 | 0     | 0.018 | 0     | 0.018 | 0     | 0.018 | 0     |
| 190 | BTOL3OH1O  | 0     | 0     | 0     | 0     | 0     | 0     | 0     | 0     | 0     | 0     | 0     | 0     |
| 191 | AR0110     | 0.448 | 0.16  | 0.373 | 1.173 | 0.08  | 2.292 | 0.125 | 1.479 | 0.114 | 1.087 | 0.114 | 1.101 |
| 191 | AR0115     | 0.13  | 0.036 | 0.148 | 0.044 | 0.036 | 0.652 | 0.065 | 0.36  | 0.057 | 0.26  | 0.057 | 0.264 |
| 194 | 2D6000     | 0     | 0     | 0     | 0     | 0     | 0     | 0     | 0     | 0     | 0     | 0     | 0     |
| 196 | 3H5009     | 0     | 0     | 0     | 0     | 0     | 0     | 0     | 0     | 0     | 0     | 0     | 0     |
| 199 | AR0138     | 0.074 | 0.012 | 0.086 | 0.001 | 0.02  | 0.066 | 0.068 | 0.019 | 0.033 | 0.006 | 0.033 | 0.007 |
| 202 | TOL4OH1NO2 | 0.507 | 0.237 | 0.006 | 0.283 | 0.007 | 0.32  | 0.011 | 0.529 | 0.01  | 0.409 | 0.01  | 0.406 |
| 204 | AR0093     | 2.068 | 0.002 | 2.069 | 0     | 2.064 | 0.056 | 2.068 | 0.004 | 2.06  | 0.003 | 2.06  | 0.003 |
| 206 | 2D7000     | 0.005 | 0     | 0.004 | 0     | 0.002 | 0     | 0.003 | 0     | 0.003 | 0     | 0.003 | 0     |
| 206 | BTOL3OH2O  | 0.01  | 0     | 0.009 | 0     | 0.009 | 0     | 0.009 | 0     | 0.009 | 0     | 0.009 | 0     |
| 206 | BTOL4OH1O  | 0     | 0     | 0     | 0     | 0     | 0     | 0     | 0     | 0     | 0     | 0     | 0     |
| 206 | radHOM7O   | 0.001 | 0     | 0.001 | 0     | 0.001 | 0     | 0.001 | 0     | 0.001 | 0     | 0.001 | 0     |
| 207 | BTOL3OHOOH | 0.035 | 0.016 | 0.014 | 0.251 | 0.012 | 0.268 | 0.013 | 0.207 | 0.013 | 0.175 | 0.013 | 0.176 |
| 207 | HOM10OH    | 0     | 0     | 0     | 0     | 0     | 0     | 0     | 0     | 0     | 0     | 0     | 0     |
| 208 | PK5001     | 2.242 | 0.039 | 2.123 | 0.177 | 0.425 | 0.984 | 1.224 | 0.385 | 0.942 | 0.263 | 0.94  | 0.26  |
| 209 | 1P5006     | 0     | 0     | 0     | 0     | 0     | 0     | 0     | 0     | 0     | 0     | 0     | 0     |
| 217 | AR0141     | 0     | 0     | 0     | 0     | 0     | 0     | 0     | 0     | 0     | 0     | 0     | 0     |
| 218 | AR0105     | 0.487 | 0     | 0.487 | 0     | 0.487 | 0.003 | 0.487 | 0     | 0.487 | 0     | 0.487 | 0     |
| 219 | AR0118     | 0     | 0     | 0     | 0     | 0     | 0     | 0     | 0     | 0     | 0     | 0     | 0     |
| 220 | AR0109     | 0.246 | 0.025 | 0.263 | 0.017 | 0.04  | 0.59  | 0.141 | 0.238 | 0.091 | 0.124 | 0.091 | 0.125 |
| 221 | HOM2O      | 0.015 | 0.007 | 0.007 | 0.126 | 0.006 | 0.134 | 0.006 | 0.088 | 0.006 | 0.073 | 0.006 | 0.074 |
| 222 | BTOL4OH2O  | 0.007 | 0     | 0.003 | 0     | 0.005 | 0     | 0.007 | 0     | 0.006 | 0     | 0.006 | 0     |
| 222 | BTOL5OH1O  | 0     | 0     | 0     | 0     | 0     | 0     | 0     | 0     | 0     | 0     | 0     | 0     |
| 223 | BTOL4OHOOH | 0.027 | 0.012 | 0.005 | 0.102 | 0.007 | 0.142 | 0.01  | 0.172 | 0.009 | 0.143 | 0.009 | 0.143 |
| 224 | PD5002     | 0.037 | 0     | 0.009 | 0     | 0.007 | 0     | 0.009 | 0     | 0.008 | 0     | 0.008 | 0     |
| 224 | PK5003     | 0.237 | 0.096 | 0.025 | 0.351 | 0.019 | 0.353 | 0.023 | 0.35  | 0.022 | 0.285 | 0.022 | 0.286 |
| 225 | 1P500A     | 0     | 0     | 0     | 0     | 0     | 0     | 0     | 0     | 0     | 0     | 0     | 0     |

|     |           |       |       |       |       |       |       |       |       |       |       |       |       |
|-----|-----------|-------|-------|-------|-------|-------|-------|-------|-------|-------|-------|-------|-------|
| 225 | 2P5000    | 0     | 0     | 0     | 0     | 0     | 0     | 0     | 0     | 0     | 0     | 0     | 0     |
| 225 | 2P5006    | 0.035 | 0     | 0.035 | 0     | 0.035 | 0     | 0.035 | 0     | 0.034 | 0     | 0.034 | 0     |
| 225 | 3P400X    | 0     | 0     | 0     | 0     | 0     | 0     | 0     | 0     | 0     | 0     | 0     | 0     |
| 226 | PH5000    | 0.006 | 0.002 | 0.003 | 0.007 | 0.001 | 0.011 | 0.001 | 0.01  | 0.001 | 0.008 | 0.001 | 0.008 |
| 226 | PH5002    | 0.661 | 0.247 | 0.798 | 0.112 | 0.165 | 1.945 | 0.274 | 1.525 | 0.238 | 1.199 | 0.236 | 1.213 |
| 227 | 3P4000    | 0.001 | 0     | 0.001 | 0     | 0.001 | 0     | 0.001 | 0     | 0.001 | 0     | 0.001 | 0     |
| 235 | AR0101    | 0.003 | 0     | 0.003 | 0     | 0.003 | 0     | 0.003 | 0     | 0.003 | 0     | 0.003 | 0     |
| 235 | AR0152    | 0     | 0     | 0     | 0     | 0     | 0     | 0     | 0     | 0     | 0     | 0     | 0     |
| 236 | AR0119    | 0.047 | 0     | 0.047 | 0     | 0.047 | 0     | 0.047 | 0     | 0.047 | 0     | 0.047 | 0     |
| 236 | HOM10NO2  | 0     | 0     | 0     | 0     | 0     | 0.002 | 0     | 0.001 | 0     | 0.001 | 0     | 0.001 |
| 238 | BTOL5OH2O | 0.005 | 0     | 0.001 | 0     | 0.002 | 0     | 0.002 | 0     | 0.002 | 0     | 0.002 | 0     |
| 238 | radHOM90  | 0.017 | 0     | 0.017 | 0     | 0.017 | 0     | 0.017 | 0     | 0.017 | 0     | 0.017 | 0     |
| 239 | BTOL5OHOH | 0.02  | 0.009 | 0.002 | 0.043 | 0.002 | 0.054 | 0.003 | 0.079 | 0.003 | 0.065 | 0.003 | 0.065 |
| 239 | HOM20OH   | 0     | 0     | 0     | 0     | 0     | 0     | 0     | 0     | 0     | 0     | 0     | 0     |
| 241 | 2P500A    | 0.009 | 0     | 0.009 | 0     | 0.008 | 0     | 0.009 | 0     | 0.008 | 0     | 0.008 | 0     |
| 242 | PH5004    | 0.245 | 0.098 | 0.047 | 0.559 | 0.038 | 0.57  | 0.045 | 0.552 | 0.043 | 0.465 | 0.042 | 0.466 |
| 251 | AR0142    | 0.003 | 0     | 0.002 | 0     | 0.001 | 0     | 0.002 | 0     | 0.001 | 0     | 0.001 | 0     |
| 252 | AR0153    | 0.18  | 0.066 | 0.014 | 0.144 | 0.005 | 0.08  | 0.017 | 0.207 | 0.01  | 0.121 | 0.009 | 0.121 |
| 268 | HOM20NO2  | 0.005 | 0.002 | 0.002 | 0.041 | 0.002 | 0.044 | 0.002 | 0.035 | 0.002 | 0.03  | 0.002 | 0.031 |
| 271 | PP4004    | 0.223 | 0.047 | 0.06  | 0.015 | 0.004 | 0.062 | 0.021 | 0.066 | 0.013 | 0.039 | 0.013 | 0.038 |
| 273 | PP4000    | 0.277 | 0.106 | 0.053 | 0.531 | 0.033 | 0.556 | 0.04  | 0.533 | 0.038 | 0.432 | 0.038 | 0.434 |

**Table S11.2: Final concentrations of simulated secondary species at 295K - partitioning test section ( $\mu\text{g}/\text{m}^3$ )**

|     |           | 295 K   |       |         |       |         |       |         |       |         |       |         |       |
|-----|-----------|---------|-------|---------|-------|---------|-------|---------|-------|---------|-------|---------|-------|
|     |           | T1      |       | T2      |       | T3      |       | T4      |       | T5      |       | T6      |       |
| m/z | species   | gas     | part. |
| 31  | CH2O      | 4.365   | 0     | 4.361   | 0     | 4.321   | 0     | 4.355   | 0     | 4.342   | 0     | 4.342   | 0     |
| 45  | D02000    | 4.33    | 0     | 4.33    | 0     | 4.33    | 0     | 4.33    | 0     | 4.33    | 0     | 4.33    | 0     |
| 59  | DD2000    | 31.146  | 0     | 31.074  | 0     | 31.045  | 0     | 31.124  | 0     | 31.067  | 0     | 31.066  | 0     |
| 61  | A02000    | 0.543   | 0     | 0.543   | 0     | 0.543   | 0     | 0.543   | 0     | 0.543   | 0     | 0.543   | 0     |
| 73  | DK3000    | 9.109   | 0     | 8.956   | 0     | 8.995   | 0     | 9.055   | 0     | 9.045   | 0     | 8.315   | 0.481 |
| 75  | AD2000    | 0.974   | 0     | 0.8     | 0     | 0.84    | 0     | 0.918   | 0     | 0.888   | 0     | 0.886   | 0     |
| 76  | 3K2000    | 0.024   | 0     | 0.024   | 0     | 0.023   | 0     | 0.023   | 0     | 0.023   | 0     | 0.022   | 0     |
| 76  | radED4001 | 0.004   | 0     | 0.004   | 0     | 0.003   | 0     | 0.004   | 0     | 0.003   | 0     | 0.003   | 0     |
| 77  | HD2000    | 0.068   | 0     | 0.067   | 0     | 0.062   | 0     | 0.066   | 0     | 0.064   | 0     | 0.064   | 0     |
| 85  | FURON     | 0.606   | 0     | 0.606   | 0     | 0.606   | 0     | 0.606   | 0     | 0.606   | 0     | 0.606   | 0     |
| 85  | UD4000    | 1.46    | 0     | 1.46    | 0     | 1.458   | 0     | 1.46    | 0     | 1.459   | 0     | 1.459   | 0     |
| 87  | DD3001    | 0.516   | 0     | 0.505   | 0     | 0.443   | 0     | 0.514   | 0     | 0.495   | 0     | 0.495   | 0     |
| 89  | AK3000    | 0.978   | 0     | 0.811   | 0     | 0.794   | 0     | 0.912   | 0     | 0.896   | 0     | 0.893   | 0     |
| 89  | DD3000    | 1.108   | 0     | 1.105   | 0     | 1.09    | 0.004 | 1.104   | 0.001 | 1.101   | 0.001 | 1.101   | 0.001 |
| 91  | AA2000    | 0.811   | 0     | 0.527   | 0.003 | 0.659   | 0.001 | 0.737   | 0.002 | 0.728   | 0.004 | 0.725   | 0.003 |
| 93  | TOL       | 243.419 | 0     | 243.416 | 0     | 243.416 | 0     | 243.416 | 0     | 243.416 | 0     | 243.416 | 0     |
| 94  | AR0013    | 0.017   | 0     | 0.017   | 0     | 0.017   | 0     | 0.017   | 0     | 0.017   | 0     | 0.017   | 0     |
| 97  | FURR3     | 0.363   | 0     | 0.363   | 0     | 0.363   | 0     | 0.363   | 0     | 0.363   | 0     | 0.363   | 0     |
| 99  | MALAHY    | 4.359   | 0     | 4.357   | 0     | 4.332   | 0.022 | 4.356   | 0.002 | 4.342   | 0.001 | 4.341   | 0.001 |
| 99  | MFUR      | 0.859   | 0     | 0.859   | 0     | 0.858   | 0     | 0.859   | 0     | 0.859   | 0     | 0.858   | 0     |
| 99  | UD5000    | 2.163   | 0     | 2.16    | 0     | 2.154   | 0     | 2.158   | 0     | 2.157   | 0     | 2.157   | 0     |
| 99  | UD5001    | 1.282   | 0     | 1.282   | 0     | 1.282   | 0     | 1.282   | 0     | 1.282   | 0     | 1.282   | 0     |
| 101 | AR0010    | 0.971   | 0     | 0.953   | 0     | 0.689   | 0     | 0.92    | 0     | 0.864   | 0     | 0.861   | 0     |
| 101 | AU4000    | 0.294   | 0     | 0.282   | 0     | 0.256   | 0.001 | 0.283   | 0     | 0.277   | 0     | 0.276   | 0     |
| 101 | DK4001    | 0.106   | 0     | 0.1     | 0     | 0.078   | 0     | 0.102   | 0     | 0.096   | 0     | 0.096   | 0     |
| 102 | 1D4000    | 0       | 0     | 0       | 0     | 0       | 0     | 0       | 0     | 0       | 0     | 0       | 0     |
| 102 | 1D4001    | 0       | 0     | 0       | 0     | 0       | 0     | 0       | 0     | 0       | 0     | 0       | 0     |
| 103 | DK4000    | 0.729   | 0     | 0.723   | 0     | 0.693   | 0     | 0.721   | 0     | 0.713   | 0     | 0.713   | 0     |
| 107 | AR0102    | 6.478   | 0     | 6.478   | 0     | 6.478   | 0     | 6.478   | 0     | 6.478   | 0     | 6.478   | 0     |
| 108 | AR0089    | 0       | 0     | 0       | 0     | 0       | 0     | 0       | 0     | 0       | 0     | 0       | 0     |
| 108 | AR0098    | 0.01    | 0     | 0.01    | 0     | 0.01    | 0     | 0.01    | 0     | 0.01    | 0     | 0.01    | 0     |
| 109 | AR0088    | 6.463   | 0     | 6.463   | 0     | 6.463   | 0     | 6.463   | 0     | 6.463   | 0     | 6.463   | 0     |
| 110 | AR0028    | 0.032   | 0     | 0.032   | 0     | 0.032   | 0     | 0.032   | 0     | 0.032   | 0     | 0.032   | 0     |

|     |         |        |       |        |       |       |       |        |       |        |       |        |       |
|-----|---------|--------|-------|--------|-------|-------|-------|--------|-------|--------|-------|--------|-------|
| 111 | AR0043  | 0.105  | 0     | 0.105  | 0     | 0.105 | 0     | 0.105  | 0     | 0.105  | 0     | 0.105  | 0     |
| 111 | FURR5   | 0.738  | 0     | 0.738  | 0     | 0.738 | 0     | 0.738  | 0     | 0.738  | 0     | 0.738  | 0     |
| 113 | FURR6   | 2.985  | 0     | 2.98   | 0     | 2.95  | 0.023 | 2.981  | 0.002 | 2.964  | 0.001 | 2.964  | 0.001 |
| 115 | AU5000  | 0.303  | 0     | 0.244  | 0     | 0.282 | 0.002 | 0.288  | 0.001 | 0.284  | 0     | 0.284  | 0.001 |
| 115 | AU5002  | 1.055  | 0     | 1.054  | 0     | 1.023 | 0     | 1.05   | 0     | 1.04   | 0     | 1.039  | 0     |
| 115 | UD5002  | 0.132  | 0     | 0.132  | 0     | 0.126 | 0     | 0.131  | 0     | 0.129  | 0     | 0.129  | 0     |
| 117 | AD4000  | 0.169  | 0     | 0.153  | 0.018 | 0.138 | 0.052 | 0.147  | 0.025 | 0.12   | 0.017 | 0.12   | 0.017 |
| 117 | AR0040  | 0.058  | 0     | 0.057  | 0     | 0.048 | 0     | 0.058  | 0     | 0.055  | 0     | 0.055  | 0     |
| 117 | ED4001  | 0.718  | 0     | 0.714  | 0     | 0.636 | 0     | 0.684  | 0     | 0.664  | 0     | 0.662  | 0     |
| 122 | P02000  | 22.202 | 0     | 22.071 | 0     | 21.61 | 0     | 22.128 | 0     | 21.973 | 0     | 21.613 | 0     |
| 123 | AR0127  | 0.809  | 0     | 0.809  | 0     | 0.772 | 0     | 0.802  | 0     | 0.791  | 0     | 0.79   | 0     |
| 123 | AR0132  | 0.112  | 0     | 0.112  | 0     | 0.112 | 0     | 0.112  | 0     | 0.112  | 0     | 0.112  | 0     |
| 123 | BZALDOH | 1.046  | 0     | 1.046  | 0     | 1.045 | 0     | 1.046  | 0     | 1.046  | 0     | 1.046  | 0     |
| 124 | AR0085  | 0.025  | 0     | 0.025  | 0     | 0.025 | 0     | 0.025  | 0     | 0.025  | 0     | 0.025  | 0     |
| 124 | AR0112  | 0.009  | 0     | 0.009  | 0     | 0.009 | 0     | 0.009  | 0     | 0.009  | 0     | 0.009  | 0     |
| 124 | AR0116  | 0.018  | 0     | 0.018  | 0     | 0.017 | 0     | 0.018  | 0     | 0.017  | 0     | 0.017  | 0     |
| 125 | AR0091  | 2.387  | 0     | 2.387  | 0     | 2.387 | 0     | 2.387  | 0     | 2.387  | 0     | 2.387  | 0     |
| 125 | AR0100  | 1.057  | 0     | 1.057  | 0     | 1.057 | 0     | 1.057  | 0     | 1.057  | 0     | 1.057  | 0     |
| 125 | AR0125  | 0.263  | 0     | 0.263  | 0     | 0.263 | 0     | 0.263  | 0     | 0.263  | 0     | 0.263  | 0     |
| 125 | UU7000  | 3.167  | 0     | 3.167  | 0     | 3.167 | 0     | 3.167  | 0     | 3.167  | 0     | 3.167  | 0     |
| 127 | FUROH   | 0.62   | 0     | 0.62   | 0     | 0.62  | 0     | 0.62   | 0     | 0.62   | 0     | 0.62   | 0     |
| 128 | 1U6000  | 0      | 0     | 0      | 0     | 0     | 0     | 0      | 0     | 0      | 0     | 0      | 0     |
| 129 | UD6000  | 0.445  | 0     | 0.445  | 0     | 0.445 | 0.001 | 0.445  | 0     | 0.445  | 0     | 0.445  | 0     |
| 130 | 3U5000  | 0.002  | 0     | 0.002  | 0     | 0.002 | 0     | 0.002  | 0     | 0.002  | 0     | 0.002  | 0     |
| 130 | 3U5001  | 0.002  | 0     | 0.002  | 0     | 0.002 | 0     | 0.002  | 0     | 0.002  | 0     | 0.002  | 0     |
| 130 | 3U5002  | 0.037  | 0     | 0.037  | 0     | 0.037 | 0     | 0.037  | 0     | 0.037  | 0     | 0.037  | 0     |
| 131 | AD5000  | 0.39   | 0     | 0.235  | 0.008 | 0.299 | 0.043 | 0.322  | 0.024 | 0.305  | 0.019 | 0.302  | 0.019 |
| 131 | DD5002  | 0.397  | 0     | 0.393  | 0     | 0.358 | 0.01  | 0.388  | 0.001 | 0.382  | 0.001 | 0.382  | 0.001 |
| 131 | DK5000  | 0.137  | 0     | 0.128  | 0.001 | 0.12  | 0.028 | 0.127  | 0.004 | 0.128  | 0.002 | 0.127  | 0.002 |
| 131 | GU5002  | 1.78   | 0     | 1.78   | 0     | 1.776 | 0     | 1.78   | 0     | 1.776  | 0     | 1.776  | 0     |
| 132 | 1D5000  | 0      | 0     | 0      | 0     | 0     | 0     | 0      | 0     | 0      | 0     | 0      | 0     |
| 132 | 1D5001  | 0      | 0     | 0      | 0     | 0     | 0     | 0      | 0     | 0      | 0     | 0      | 0     |
| 132 | 1D5003  | 0      | 0     | 0      | 0     | 0     | 0     | 0      | 0     | 0      | 0     | 0      | 0     |
| 132 | AR0020  | 0.003  | 0     | 0.003  | 0     | 0.002 | 0     | 0.003  | 0     | 0.003  | 0     | 0.003  | 0     |
| 132 | AR0133  | 0      | 0     | 0      | 0     | 0     | 0     | 0      | 0     | 0      | 0     | 0      | 0     |
| 132 | ED5000  | 1.818  | 0     | 1.808  | 0     | 1.593 | 0     | 1.732  | 0     | 1.666  | 0     | 1.663  | 0     |
| 133 | AD4001  | 0.329  | 0.027 | 0.009  | 0.33  | 0.013 | 0.51  | 0.018  | 0.529 | 0.017  | 0.392 | 0.017  | 0.396 |
| 133 | AR0039  | 0.082  | 0     | 0.081  | 0     | 0.064 | 0     | 0.081  | 0     | 0.077  | 0     | 0.077  | 0     |

|     |           |       |       |       |       |       |       |       |       |       |       |       |       |
|-----|-----------|-------|-------|-------|-------|-------|-------|-------|-------|-------|-------|-------|-------|
| 134 | 2D4000    | 1.879 | 0     | 1.879 | 0     | 1.878 | 0     | 1.879 | 0     | 1.878 | 0     | 1.878 | 0     |
| 134 | AR0035    | 0.012 | 0     | 0.012 | 0     | 0.01  | 0     | 0.011 | 0     | 0.01  | 0     | 0.01  | 0     |
| 134 | radED5002 | 0.013 | 0     | 0.012 | 0     | 0.011 | 0     | 0.012 | 0     | 0.011 | 0     | 0.011 | 0     |
| 135 | AR0048    | 0.387 | 0.001 | 0.376 | 0.023 | 0.158 | 0.41  | 0.268 | 0.18  | 0.197 | 0.096 | 0.197 | 0.101 |
| 135 | ED500200H | 0.779 | 0     | 0.775 | 0     | 0.717 | 0.002 | 0.768 | 0     | 0.748 | 0     | 0.747 | 0     |
| 138 | AR0120    | 0.006 | 0     | 0.006 | 0     | 0.006 | 0     | 0.006 | 0     | 0.006 | 0     | 0.006 | 0     |
| 138 | NTOL      | 3.131 | 0     | 3.131 | 0     | 3.131 | 0     | 3.131 | 0     | 3.131 | 0     | 3.131 | 0     |
| 139 | AR0042    | 0.076 | 0     | 0.076 | 0     | 0.075 | 0     | 0.076 | 0     | 0.076 | 0     | 0.076 | 0     |
| 139 | AR0131    | 0.279 | 0     | 0.279 | 0     | 0.279 | 0     | 0.279 | 0     | 0.279 | 0     | 0.279 | 0     |
| 139 | MBQN10H   | 0.628 | 0     | 0.628 | 0     | 0.624 | 0.008 | 0.628 | 0     | 0.628 | 0     | 0.628 | 0     |
| 139 | Me6Cy1U3K | 0.027 | 0     | 0.027 | 0     | 0.026 | 0     | 0.027 | 0     | 0.027 | 0     | 0.027 | 0     |
| 140 | AR0027    | 2.455 | 0     | 2.454 | 0     | 2.451 | 0.003 | 2.454 | 0     | 2.454 | 0     | 2.454 | 0     |
| 140 | AR0129    | 0.019 | 0     | 0.019 | 0     | 0.018 | 0     | 0.019 | 0     | 0.018 | 0     | 0.018 | 0     |
| 140 | TOL20H10  | 0.006 | 0     | 0.003 | 0     | 0.005 | 0     | 0.005 | 0     | 0.005 | 0     | 0.005 | 0     |
| 141 | AR0087    | 1.156 | 0     | 1.156 | 0     | 1.156 | 0     | 1.156 | 0     | 1.156 | 0     | 1.156 | 0     |
| 141 | AR0144    | 0.158 | 0     | 0.157 | 0.001 | 0.154 | 0.012 | 0.158 | 0     | 0.154 | 0     | 0.154 | 0     |
| 141 | TOL30H    | 0.734 | 0     | 0.389 | 6.144 | 0.734 | 0.539 | 0.731 | 0.032 | 0.715 | 0.014 | 0.715 | 0.018 |
| 143 | AU6000    | 0.087 | 0     | 0.087 | 0     | 0.086 | 0.001 | 0.087 | 0     | 0.084 | 0     | 0.084 | 0     |
| 144 | 2U6000    | 0.001 | 0     | 0.001 | 0     | 0.001 | 0     | 0.001 | 0     | 0.001 | 0     | 0.001 | 0     |
| 147 | AK5000    | 0.234 | 0.012 | 0.014 | 0.321 | 0.016 | 0.515 | 0.024 | 0.436 | 0.022 | 0.287 | 0.022 | 0.296 |
| 148 | 2D5000    | 0.002 | 0     | 0.002 | 0     | 0.002 | 0     | 0.002 | 0     | 0.002 | 0     | 0.002 | 0     |
| 148 | 2D5001    | 0.002 | 0     | 0.002 | 0     | 0.002 | 0     | 0.002 | 0     | 0.002 | 0     | 0.002 | 0     |
| 148 | 2D5002    | 0     | 0     | 0     | 0     | 0     | 0     | 0     | 0     | 0     | 0     | 0     | 0     |
| 148 | 2D5003    | 0.008 | 0     | 0.008 | 0     | 0.008 | 0     | 0.008 | 0     | 0.008 | 0     | 0.008 | 0     |
| 148 | AR0080    | 0.371 | 0     | 0.371 | 0     | 0.37  | 0     | 0.371 | 0     | 0.37  | 0     | 0.37  | 0     |
| 148 | AR0121    | 0.024 | 0     | 0.024 | 0     | 0.02  | 0     | 0.022 | 0     | 0.021 | 0     | 0.021 | 0     |
| 149 | AA4000    | 0.153 | 0.013 | 0.002 | 0.105 | 0.003 | 0.156 | 0.005 | 0.236 | 0.005 | 0.205 | 0.005 | 0.202 |
| 149 | AR0134    | 1.211 | 0.005 | 1.183 | 0.058 | 0.434 | 1.298 | 0.792 | 0.566 | 0.532 | 0.258 | 0.527 | 0.276 |
| 149 | HD5000    | 0.071 | 0     | 0.071 | 0     | 0.071 | 0     | 0.071 | 0     | 0.071 | 0     | 0.071 | 0     |
| 149 | HD5001    | 0.032 | 0     | 0.032 | 0     | 0.032 | 0     | 0.032 | 0     | 0.032 | 0     | 0.032 | 0     |
| 153 | AR0126    | 0.001 | 0     | 0.001 | 0     | 0.001 | 0     | 0.001 | 0     | 0.001 | 0     | 0.001 | 0     |
| 154 | AR0090    | 1.078 | 0     | 1.078 | 0     | 1.078 | 0     | 1.078 | 0     | 1.078 | 0     | 1.078 | 0     |
| 154 | AR0113    | 1.932 | 0     | 1.932 | 0     | 1.929 | 0.004 | 1.932 | 0     | 1.929 | 0     | 1.929 | 0     |
| 155 | MBQN1K10H | 0.106 | 0     | 0.101 | 0.001 | 0.036 | 0.023 | 0.087 | 0.002 | 0.08  | 0.001 | 0.078 | 0.001 |
| 155 | MBQN20H   | 0.545 | 0.001 | 0.318 | 0.016 | 0.124 | 0.82  | 0.456 | 0.114 | 0.361 | 0.024 | 0.356 | 0.031 |
| 156 | 3U7000    | 0.009 | 0     | 0.009 | 0     | 0.009 | 0     | 0.009 | 0     | 0.009 | 0     | 0.009 | 0     |
| 156 | AR014010  | 0     | 0     | 0     | 0     | 0     | 0     | 0     | 0     | 0     | 0     | 0     | 0     |
| 156 | TOL20H20  | 0.006 | 0     | 0.002 | 0     | 0.004 | 0     | 0.005 | 0     | 0.005 | 0     | 0.005 | 0     |



|     |            |        |       |        |       |        |       |        |       |        |       |        |       |
|-----|------------|--------|-------|--------|-------|--------|-------|--------|-------|--------|-------|--------|-------|
| 156 | TOL3OH10   | 0.005  | 0     | 0.001  | 0     | 0.001  | 0     | 0.002  | 0     | 0.002  | 0     | 0.002  | 0     |
| 157 | AR0104     | 7.654  | 0     | 7.654  | 0     | 7.641  | 0.008 | 7.651  | 0     | 7.627  | 0     | 7.627  | 0     |
| 157 | AR0107     | 0.014  | 0     | 0.014  | 0     | 0.014  | 0     | 0.014  | 0     | 0.014  | 0     | 0.014  | 0     |
| 157 | TOL2OHOOH  | 0.057  | 0.002 | 0.007  | 0.092 | 0.013  | 0.154 | 0.039  | 0.04  | 0.035  | 0.014 | 0.034  | 0.018 |
| 157 | TOL4OH     | 0.604  | 0.03  | 0.122  | 3.455 | 0.209  | 5.678 | 0.293  | 2.68  | 0.286  | 1.631 | 0.275  | 1.816 |
| 157 | UD7000     | 0.362  | 0     | 0.362  | 0.002 | 0.335  | 0.124 | 0.358  | 0.007 | 0.354  | 0.002 | 0.354  | 0.003 |
| 158 | 1U7000     | 0      | 0     | 0      | 0     | 0      | 0     | 0      | 0     | 0      | 0     | 0      | 0     |
| 158 | AR0092     | 0      | 0     | 0      | 0     | 0      | 0     | 0      | 0     | 0      | 0     | 0      | 0     |
| 160 | AU50DN     | 0.319  | 0     | 0.283  | 0.001 | 0.234  | 0.008 | 0.306  | 0.003 | 0.229  | 0.002 | 0.229  | 0.002 |
| 162 | 1D6000     | 0      | 0     | 0      | 0     | 0      | 0     | 0      | 0     | 0      | 0     | 0      | 0     |
| 162 | radED5000  | 0.009  | 0     | 0.009  | 0     | 0.008  | 0     | 0.008  | 0     | 0.008  | 0     | 0.008  | 0     |
| 162 | radFURR6   | 0.001  | 0     | 0.001  | 0     | 0.001  | 0     | 0.001  | 0     | 0.001  | 0     | 0.001  | 0     |
| 163 | ED5000OOH  | 0.293  | 0     | 0.292  | 0     | 0.266  | 0.005 | 0.288  | 0.002 | 0.28   | 0.002 | 0.28   | 0.002 |
| 163 | FURR6OHOOH | 0.059  | 0.004 | 0.005  | 0.075 | 0.004  | 0.076 | 0.005  | 0.073 | 0.005  | 0.059 | 0.005  | 0.06  |
| 170 | AR0128     | 1.948  | 0.004 | 1.785  | 0.248 | 1.442  | 0.712 | 1.908  | 0.051 | 1.395  | 0.015 | 1.391  | 0.02  |
| 171 | MBQN3OH    | 0.413  | 0.025 | 0.016  | 0.259 | 0.009  | 0.414 | 0.019  | 0.459 | 0.023  | 0.227 | 0.02   | 0.239 |
| 172 | AR0095     | 0.002  | 0     | 0.002  | 0     | 0.002  | 0     | 0.002  | 0     | 0.002  | 0     | 0.002  | 0     |
| 172 | AR0140     | 0.005  | 0     | 0.005  | 0     | 0.004  | 0     | 0.005  | 0     | 0.005  | 0     | 0.005  | 0     |
| 172 | TOL3OH2O   | 0.005  | 0     | 0.001  | 0     | 0.001  | 0     | 0.002  | 0     | 0.001  | 0     | 0.001  | 0     |
| 173 | AR0106     | 0.035  | 0     | 0.035  | 0     | 0.035  | 0     | 0.035  | 0     | 0.035  | 0     | 0.035  | 0     |
| 173 | AR0124     | 0.865  | 0     | 0.844  | 0.004 | 0.302  | 0.088 | 0.668  | 0.011 | 0.586  | 0.004 | 0.577  | 0.005 |
| 173 | AR0140OOH  | 0.062  | 0.001 | 0.06   | 0.027 | 0.021  | 0.238 | 0.047  | 0.049 | 0.043  | 0.017 | 0.042  | 0.021 |
| 173 | AU7000     | 0.102  | 0.006 | 0.09   | 0.072 | 0.024  | 0.246 | 0.071  | 0.065 | 0.056  | 0.019 | 0.055  | 0.024 |
| 173 | TOL3OHOOH  | 0.045  | 0.003 | 0.002  | 0.039 | 0.003  | 0.064 | 0.005  | 0.068 | 0.005  | 0.052 | 0.005  | 0.052 |
| 173 | TOL5OH     | 0.488  | 0.045 | 0.041  | 1.455 | 0.063  | 2.296 | 0.096  | 2.584 | 0.095  | 2.122 | 0.09   | 2.125 |
| 174 | 2U7000     | 0.036  | 0     | 0.036  | 0     | 0.036  | 0     | 0.036  | 0     | 0.036  | 0     | 0.036  | 0     |
| 174 | AR0086     | 0.302  | 0     | 0.302  | 0     | 0.302  | 0     | 0.302  | 0     | 0.302  | 0     | 0.302  | 0     |
| 174 | AR0108     | 0      | 0     | 0      | 0     | 0      | 0     | 0      | 0     | 0      | 0     | 0      | 0     |
| 174 | AR0114     | 0      | 0     | 0      | 0     | 0      | 0     | 0      | 0     | 0      | 0     | 0      | 0     |
| 174 | BTOL2OH10  | 0      | 0     | 0      | 0     | 0      | 0     | 0      | 0     | 0      | 0     | 0      | 0     |
| 175 | AR0094     | 6.448  | 0.001 | 6.448  | 0.001 | 6.437  | 0.142 | 6.445  | 0.01  | 6.417  | 0.004 | 6.417  | 0.005 |
| 176 | PU5000     | 2.303  | 0     | 2.303  | 0     | 2.303  | 0     | 2.303  | 0     | 2.303  | 0     | 2.303  | 0     |
| 176 | PU5001     | 1.033  | 0     | 1.033  | 0     | 1.033  | 0     | 1.033  | 0     | 1.033  | 0     | 1.033  | 0     |
| 176 | PU5002     | 24.601 | 0     | 24.599 | 0     | 24.549 | 0.002 | 24.598 | 0     | 24.548 | 0     | 24.547 | 0     |
| 178 | 1D6001     | 0      | 0     | 0      | 0     | 0      | 0     | 0      | 0     | 0      | 0     | 0      | 0     |
| 178 | 2D6001     | 0.002  | 0     | 0.002  | 0     | 0.002  | 0     | 0.002  | 0     | 0.002  | 0     | 0.002  | 0     |
| 178 | AR0038     | 1.197  | 0     | 1.17   | 0     | 0.94   | 0     | 1.179  | 0     | 1.115  | 0     | 1.114  | 0     |
| 180 | 2G5006     | 0.003  | 0     | 0.003  | 0     | 0.003  | 0     | 0.003  | 0     | 0.003  | 0     | 0.003  | 0     |

|     |            |       |       |       |       |       |       |       |       |       |       |       |       |
|-----|------------|-------|-------|-------|-------|-------|-------|-------|-------|-------|-------|-------|-------|
| 180 | 3H5000     | 0     | 0     | 0     | 0     | 0     | 0     | 0     | 0     | 0     | 0     | 0     | 0     |
| 180 | 3H5004     | 0     | 0     | 0     | 0     | 0     | 0     | 0     | 0     | 0     | 0     | 0     | 0     |
| 181 | GH5002     | 0.06  | 0.004 | 0.057 | 0.027 | 0.012 | 0.173 | 0.014 | 0.137 | 0.014 | 0.102 | 0.013 | 0.106 |
| 184 | AR0130     | 4.145 | 0     | 4.145 | 0     | 4.145 | 0     | 4.145 | 0     | 4.145 | 0     | 4.145 | 0     |
| 186 | TOL3OH1NO2 | 0.973 | 0.056 | 0.018 | 0.713 | 0.034 | 1.087 | 0.155 | 0.977 | 0.13  | 0.428 | 0.116 | 0.471 |
| 188 | C73K10H2O  | 0.002 | 0     | 0.002 | 0     | 0.002 | 0     | 0.002 | 0     | 0.002 | 0     | 0.002 | 0     |
| 189 | C73K10HOOH | 0.017 | 0     | 0.016 | 0.009 | 0.004 | 0.051 | 0.01  | 0.02  | 0.009 | 0.009 | 0.009 | 0.01  |
| 189 | HOM10      | 0.002 | 0     | 0.002 | 0     | 0.002 | 0.002 | 0.002 | 0     | 0.002 | 0     | 0.002 | 0     |
| 190 | 1D7000     | 0     | 0     | 0     | 0     | 0     | 0     | 0     | 0     | 0     | 0     | 0     | 0     |
| 190 | AR0096     | 0.017 | 0     | 0.017 | 0     | 0.017 | 0     | 0.017 | 0     | 0.017 | 0     | 0.017 | 0     |
| 190 | AR0099     | 0.022 | 0     | 0.022 | 0     | 0.021 | 0     | 0.022 | 0     | 0.021 | 0     | 0.021 | 0     |
| 190 | BTOL3OH10  | 0     | 0     | 0     | 0     | 0     | 0     | 0     | 0     | 0     | 0     | 0     | 0     |
| 191 | AR0110     | 0.498 | 0.006 | 0.497 | 0.163 | 0.142 | 2.07  | 0.294 | 0.546 | 0.245 | 0.225 | 0.241 | 0.253 |
| 191 | AR0115     | 0.136 | 0.001 | 0.136 | 0.004 | 0.081 | 0.402 | 0.116 | 0.063 | 0.096 | 0.024 | 0.095 | 0.028 |
| 194 | 2D6000     | 0     | 0     | 0     | 0     | 0     | 0     | 0     | 0     | 0     | 0     | 0     | 0     |
| 196 | 3H5009     | 0     | 0     | 0     | 0     | 0     | 0     | 0     | 0     | 0     | 0     | 0     | 0     |
| 199 | AR0138     | 0.099 | 0     | 0.099 | 0     | 0.073 | 0.026 | 0.097 | 0.002 | 0.058 | 0     | 0.058 | 0     |
| 202 | TOL4OH1NO2 | 0.726 | 0.054 | 0.006 | 0.309 | 0.008 | 0.449 | 0.014 | 0.689 | 0.014 | 0.472 | 0.013 | 0.472 |
| 204 | AR0093     | 1.943 | 0     | 1.943 | 0     | 1.942 | 0.007 | 1.943 | 0     | 1.942 | 0     | 1.942 | 0     |
| 206 | 2D7000     | 0.006 | 0     | 0.006 | 0     | 0.004 | 0     | 0.005 | 0     | 0.005 | 0     | 0.005 | 0     |
| 206 | BTOL3OH2O  | 0.011 | 0     | 0.01  | 0     | 0.01  | 0     | 0.01  | 0     | 0.01  | 0     | 0.01  | 0     |
| 206 | BTOL4OH10  | 0     | 0     | 0     | 0     | 0     | 0     | 0     | 0     | 0     | 0     | 0     | 0     |
| 206 | radHOM7O   | 0.002 | 0     | 0.002 | 0     | 0.002 | 0     | 0.002 | 0     | 0.002 | 0     | 0.002 | 0     |
| 207 | BTOL3OHOOH | 0.036 | 0.003 | 0.016 | 0.242 | 0.01  | 0.277 | 0.012 | 0.151 | 0.012 | 0.101 | 0.012 | 0.108 |
| 207 | HOM100H    | 0     | 0     | 0     | 0     | 0     | 0     | 0     | 0     | 0     | 0     | 0     | 0     |
| 208 | PK5001     | 2.077 | 0.001 | 2.058 | 0.025 | 1.019 | 0.36  | 1.735 | 0.072 | 1.536 | 0.039 | 1.518 | 0.042 |
| 209 | 1P5006     | 0     | 0     | 0     | 0     | 0     | 0     | 0     | 0     | 0     | 0     | 0     | 0     |
| 217 | AR0141     | 0     | 0     | 0     | 0     | 0     | 0     | 0     | 0     | 0     | 0     | 0     | 0     |
| 218 | AR0105     | 0.461 | 0     | 0.461 | 0     | 0.461 | 0     | 0.461 | 0     | 0.461 | 0     | 0.461 | 0     |
| 219 | AR0118     | 0     | 0     | 0     | 0     | 0     | 0     | 0     | 0     | 0     | 0     | 0     | 0     |
| 220 | AR0109     | 0.257 | 0     | 0.257 | 0.002 | 0.144 | 0.325 | 0.234 | 0.036 | 0.197 | 0.013 | 0.196 | 0.016 |
| 221 | HOM2O      | 0.037 | 0.003 | 0.017 | 0.276 | 0.012 | 0.319 | 0.014 | 0.145 | 0.015 | 0.093 | 0.014 | 0.101 |
| 222 | BTOL4OH2O  | 0.008 | 0     | 0.004 | 0     | 0.008 | 0     | 0.008 | 0     | 0.008 | 0     | 0.008 | 0     |
| 222 | BTOL5OH10  | 0     | 0     | 0     | 0     | 0     | 0     | 0     | 0     | 0     | 0     | 0     | 0     |
| 223 | BTOL4OHOOH | 0.028 | 0.002 | 0.005 | 0.118 | 0.008 | 0.197 | 0.009 | 0.16  | 0.009 | 0.128 | 0.009 | 0.131 |
| 224 | PD5002     | 0.039 | 0     | 0.008 | 0     | 0.007 | 0     | 0.01  | 0     | 0.01  | 0     | 0.01  | 0     |
| 224 | PK5003     | 0.252 | 0.012 | 0.028 | 0.284 | 0.014 | 0.301 | 0.018 | 0.285 | 0.018 | 0.2   | 0.018 | 0.205 |
| 225 | 1P500A     | 0     | 0     | 0     | 0     | 0     | 0     | 0     | 0     | 0     | 0     | 0     | 0     |

|     |            |       |       |       |       |       |       |       |       |       |       |       |       |
|-----|------------|-------|-------|-------|-------|-------|-------|-------|-------|-------|-------|-------|-------|
| 225 | 2P5000     | 0     | 0     | 0     | 0     | 0     | 0     | 0     | 0     | 0     | 0     | 0     | 0     |
| 225 | 2P5006     | 0.042 | 0     | 0.042 | 0     | 0.042 | 0     | 0.042 | 0     | 0.042 | 0     | 0.042 | 0     |
| 225 | 3P400X     | 0     | 0     | 0     | 0     | 0     | 0     | 0     | 0     | 0     | 0     | 0     | 0     |
| 226 | PH5000     | 0.008 | 0     | 0.007 | 0.002 | 0.001 | 0.012 | 0.002 | 0.008 | 0.002 | 0.005 | 0.002 | 0.005 |
| 226 | PH5002     | 0.817 | 0.024 | 0.829 | 0.01  | 0.409 | 1.487 | 0.611 | 0.596 | 0.466 | 0.322 | 0.462 | 0.358 |
| 227 | 3P4000     | 0.001 | 0     | 0.001 | 0     | 0.001 | 0     | 0.001 | 0     | 0.001 | 0     | 0.001 | 0     |
| 235 | AR0101     | 0.003 | 0     | 0.003 | 0     | 0.003 | 0     | 0.003 | 0     | 0.003 | 0     | 0.003 | 0     |
| 235 | AR0152     | 0     | 0     | 0     | 0     | 0     | 0     | 0     | 0     | 0     | 0     | 0     | 0     |
| 236 | AR0119     | 0.044 | 0     | 0.044 | 0     | 0.044 | 0     | 0.044 | 0     | 0.044 | 0     | 0.044 | 0     |
| 236 | HOM10NO2   | 0.001 | 0     | 0.001 | 0     | 0     | 0.004 | 0.001 | 0     | 0     | 0     | 0     | 0     |
| 238 | BTOL5OH2O  | 0.007 | 0     | 0.001 | 0     | 0.002 | 0     | 0.003 | 0     | 0.003 | 0     | 0.003 | 0     |
| 238 | radHOM90   | 0.038 | 0     | 0.038 | 0     | 0.038 | 0     | 0.038 | 0     | 0.038 | 0     | 0.038 | 0     |
| 239 | BTOL5OHOOH | 0.023 | 0.002 | 0.002 | 0.049 | 0.003 | 0.077 | 0.004 | 0.105 | 0.004 | 0.094 | 0.004 | 0.093 |
| 239 | HOM200H    | 0     | 0     | 0     | 0     | 0     | 0     | 0     | 0     | 0     | 0     | 0     | 0     |
| 241 | 2P500A     | 0.01  | 0     | 0.01  | 0     | 0.01  | 0     | 0.01  | 0     | 0.01  | 0     | 0.01  | 0     |
| 242 | PH5004     | 0.293 | 0.02  | 0.042 | 0.6   | 0.035 | 0.616 | 0.042 | 0.534 | 0.042 | 0.403 | 0.041 | 0.414 |
| 251 | AR0142     | 0.004 | 0     | 0.004 | 0     | 0.003 | 0     | 0.004 | 0     | 0.003 | 0     | 0.003 | 0     |
| 252 | AR0153     | 0.264 | 0.016 | 0.021 | 0.247 | 0.014 | 0.214 | 0.023 | 0.267 | 0.017 | 0.179 | 0.017 | 0.181 |
| 268 | HOM20NO2   | 0.014 | 0.001 | 0.005 | 0.099 | 0.004 | 0.104 | 0.005 | 0.054 | 0.005 | 0.038 | 0.005 | 0.04  |
| 271 | PP4004     | 0.356 | 0.002 | 0.162 | 0.005 | 0.016 | 0.067 | 0.116 | 0.047 | 0.076 | 0.019 | 0.072 | 0.02  |
| 273 | PP4000     | 0.386 | 0.02  | 0.17  | 0.447 | 0.036 | 0.689 | 0.055 | 0.571 | 0.053 | 0.381 | 0.052 | 0.397 |

## References

- Bosque, R.; Sales, J. J. *Chem. Inf. Comput. Sci.* 2002, 42 (5), 1154–1163.
- De Haan, D. O., Jimenez, N. G., de Loera, A., Cazaunau, M., Gratien, A., Pangui, E., and Doussin, J.-F.: Methylglyoxal Uptake Coefficients on Aqueous Aerosol Surfaces, *J. Phys. Chem. A*, 122, 4854–4860, <https://doi.org/10.1021/acs.jpca.8b00533>, 2018.
- Eichler, P., Müller, M., D'Anna, B., and Wisthaler, A.: A novel inlet system for online chemical analysis of semi-volatile submicron particulate matter, *Atmos. Meas. Tech.*, 8, 1353–1360, <https://doi.org/10.5194/AMT-8-1353-2015>, 2015.
- Ellis, A. M.; Mayhew, C. A. *Proton Transfer Reaction Mass Spectrometry*; John Wiley & Sons, Ltd: Hoboken, NJ, 2014; pp 25–48.
- Gioumousis, G.; Stevenson, D. P. *J. Chem. Phys.* 1958, 29, 294–299.
- Hu, J., Chen, Z., Qin, X., and Dong, P.: Reversible and irreversible gas-particle partitioning of dicarbonyl compounds observed in the real atmosphere, *Atmos. Chem. Phys.*, 22, 6971–6987, <https://doi.org/10.5194/acp-22-6971-2022>, 2022.
- Huang, Y., Zhao, R., Charan, S. M., Kenseth, C. M., Zhang, X., and Seinfeld, J. H.: Unified Theory of Vapor-Wall Mass Transport in Teflon-Walled Environmental Chambers, *Environ. Sci. Technol.*, 52, 2134–2142, <https://doi.org/10.1021/acs.est.7b05575>, 2018.
- Krechmer, J. E., Pagonis, D., Ziemann, P. J., and Jimenez, J. L.: Quantification of Gas-Wall Partitioning in Teflon Environmental Chambers Using Rapid Bursts of Low-Volatility Oxidized Species Generated in Situ, *Environ. Sci. Technol.*, 50, 5757–5765, <https://doi.org/10.1021/acs.est.6b00606>, 2016.
- Langevin, P. *J. Chim. Phys. Phys. Chim. Biol.* 1903, 28, 433–530.
- Müller, M., Mikoviny, T., Jud, W., D'Anna, B., and Wisthaler, A.: A new software tool for the analysis of high resolution PTR-TOF mass spectra, *Chemom. Intell. Lab. Syst.*, 127, 158–165, <https://doi.org/10.1016/J.CHEMOLAB.2013.06.011>, 2013.
- Su, T.; Chesnavich, W. *J. Chem. Phys.* 1982, 76, 5183–5185.
- Zhang, X., Schwantes, R. H., McVay, R. C., Lignell, H., Coggon, M. M., Flagan, R. C., and Seinfeld, J. H.: Vapor wall deposition in Teflon chambers, *Atmos. Chem. Phys.*, 15, 4197–4214, <https://doi.org/10.5194/ACP-15-4197-2015>, 2015.
